# Supplementary material for: SC83288 is a clinical development candidate for the treatment of severe malaria
Source: PubMed Central journal article supplement (PMC5290327; doi:10.1038/ncomms14193), 2017-01-31
Supplement: ncomms14193-s1.pdf [file ncomms14193-s1.pdf]

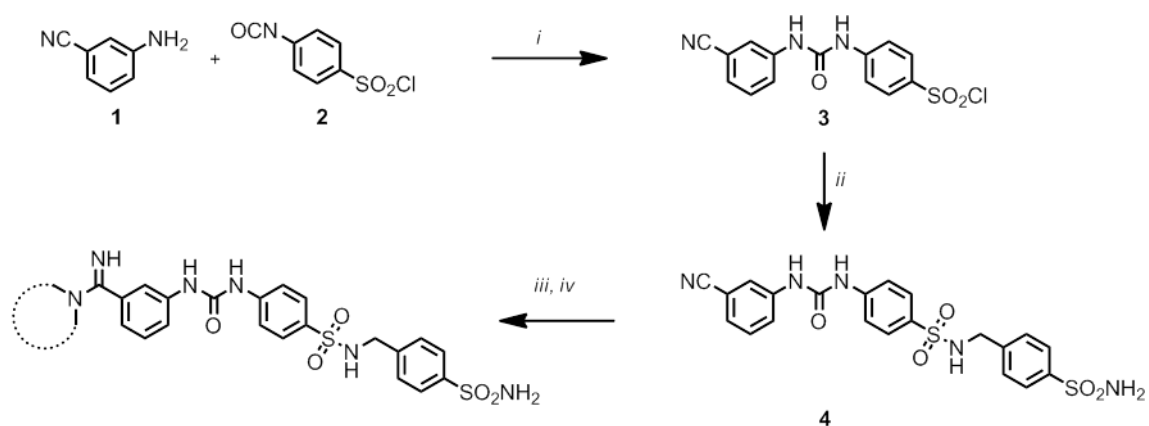

**Supplementary Figure 1: Synthesis of SC81458 and SC83288.** Scheme of the 4 step synthesis. Reagents and conditions: (i) acetonitrile, RT; (ii) 4-(aminomethyl)benzenesulfonamide, diisopropyletylamine, dimethylformamide; (iii) 4M HCl in dioxane, methanol; (iv) secondary amine, diisopropyletylamine, dimethylformamide, 70°C. Further detail is provided in the Materials and Methods section.

**a**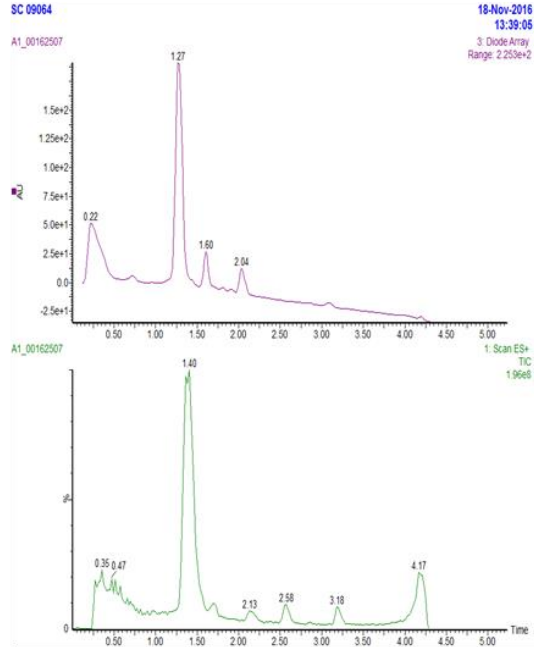**b**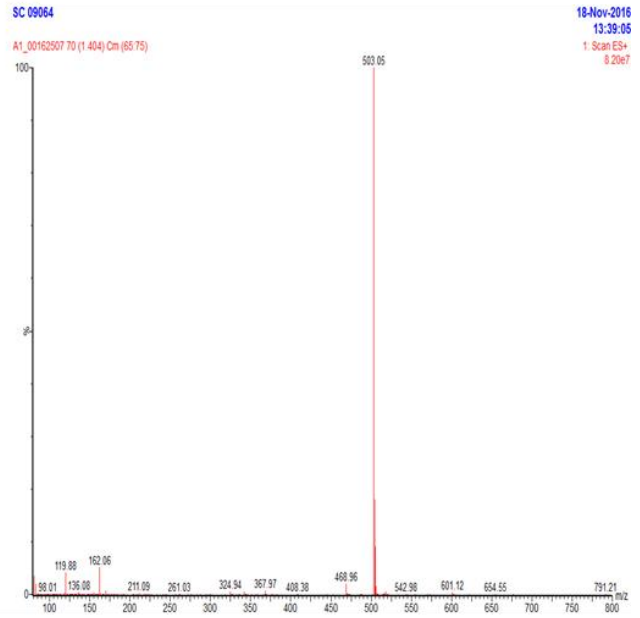**c**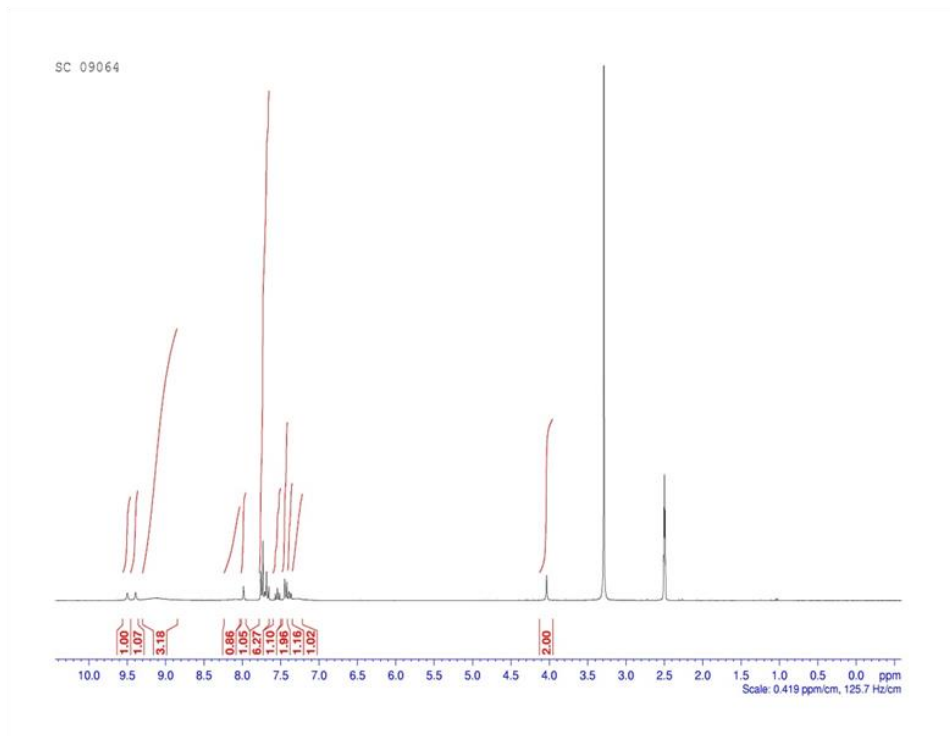

d

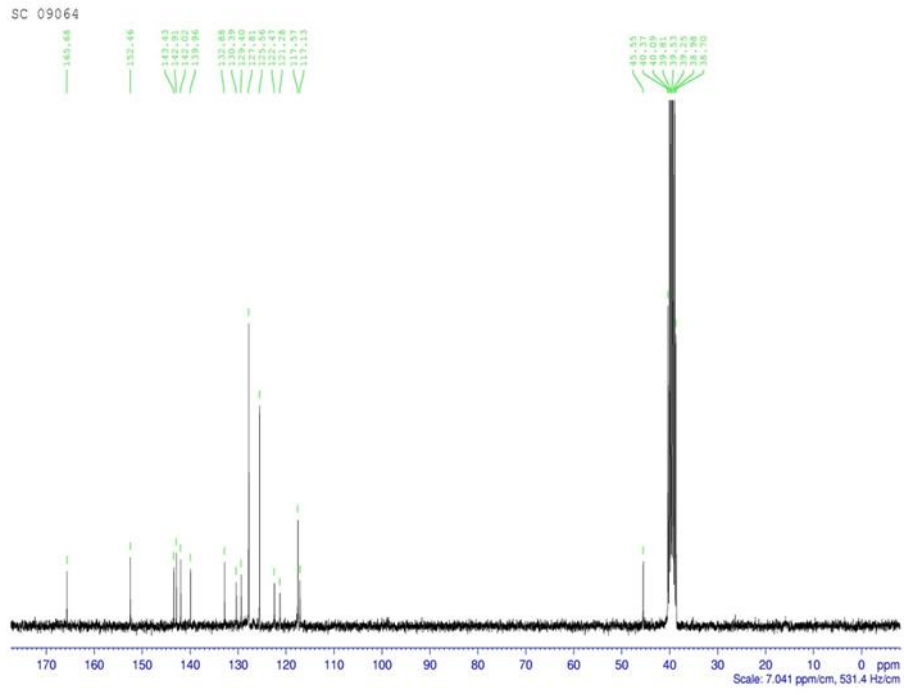

e

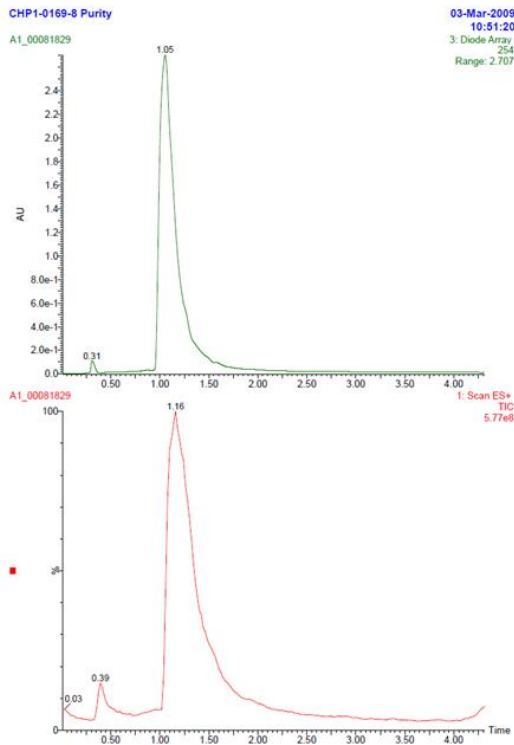

f

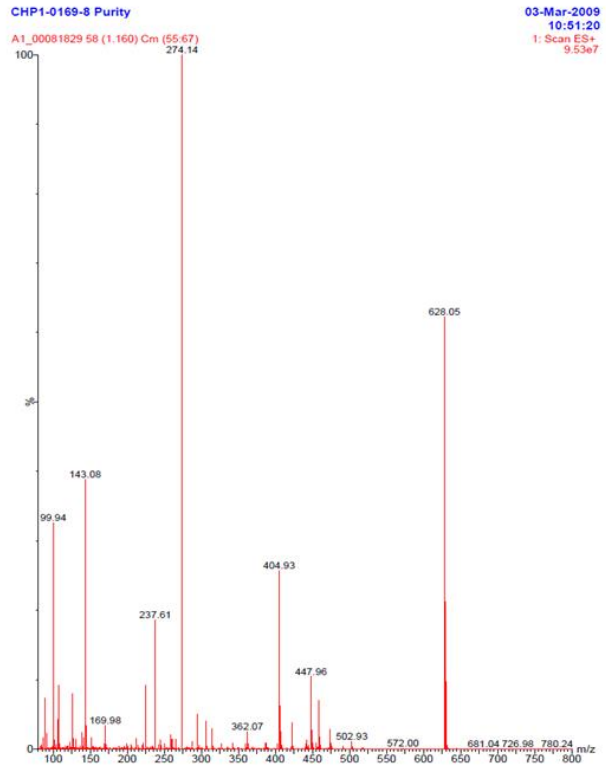

g

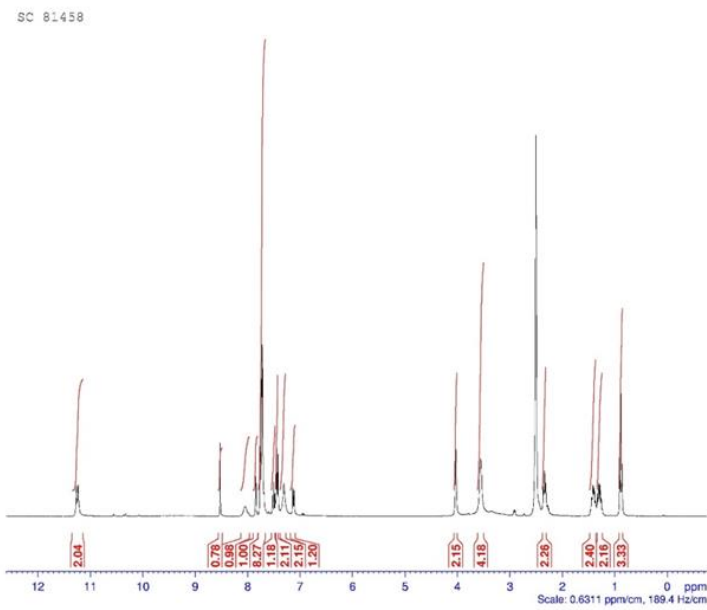

**h**

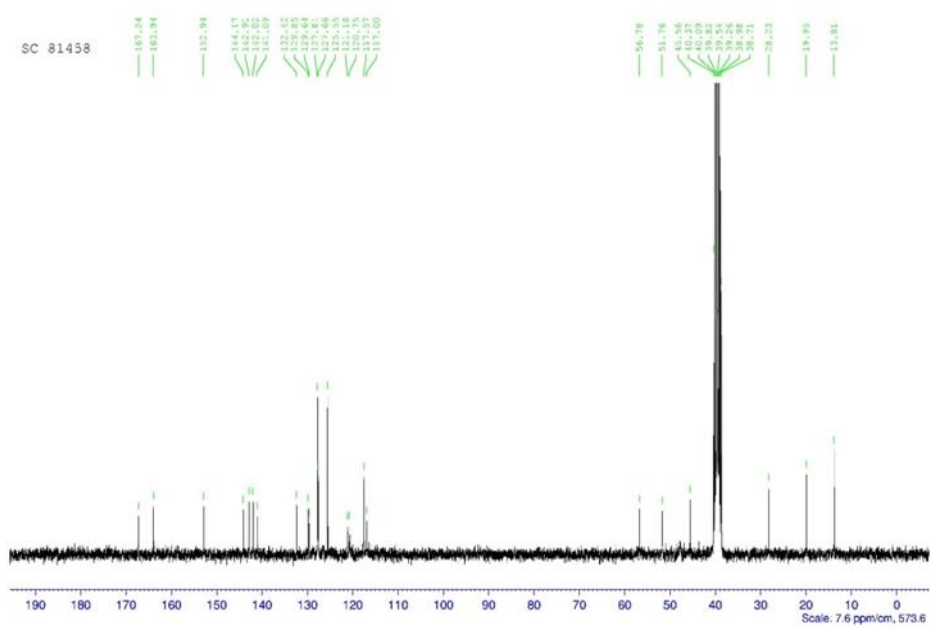

i

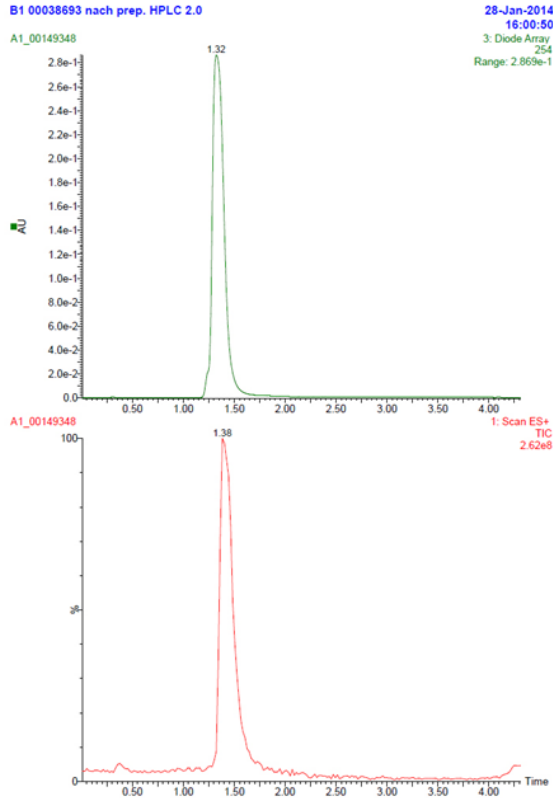

j

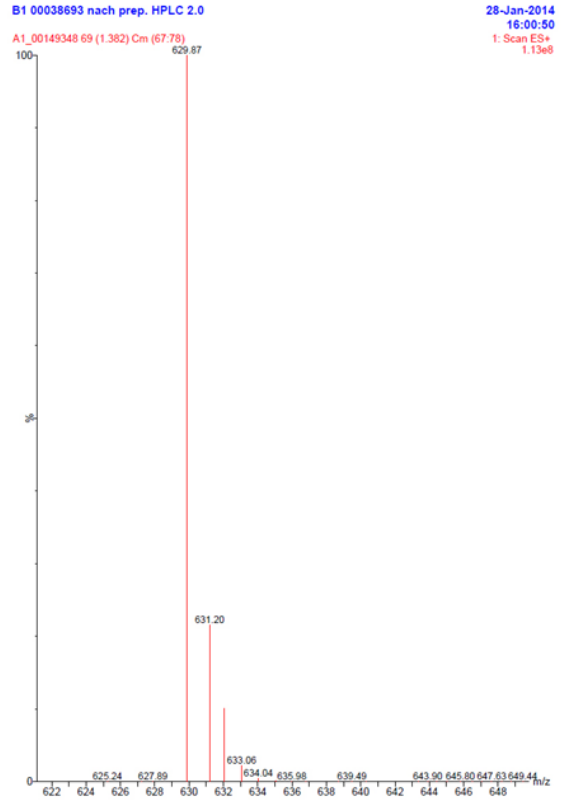

k

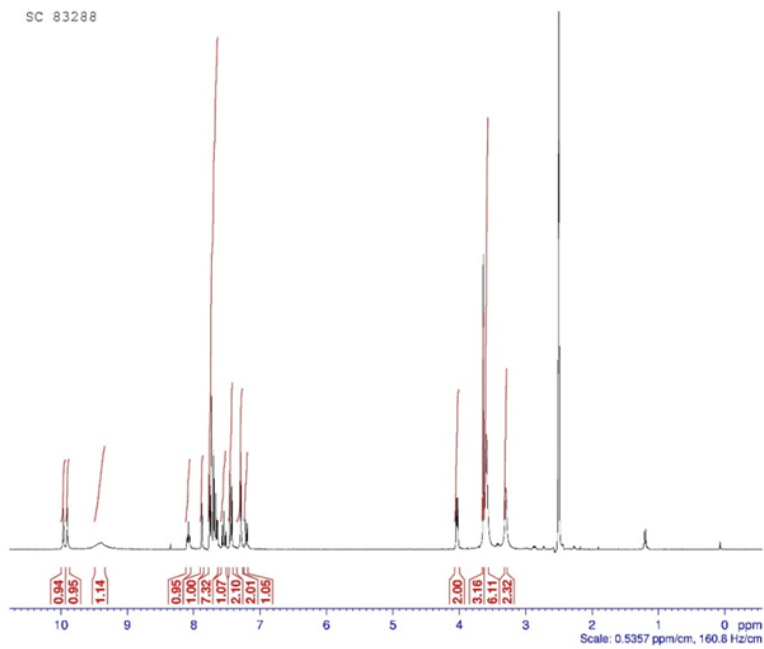

I

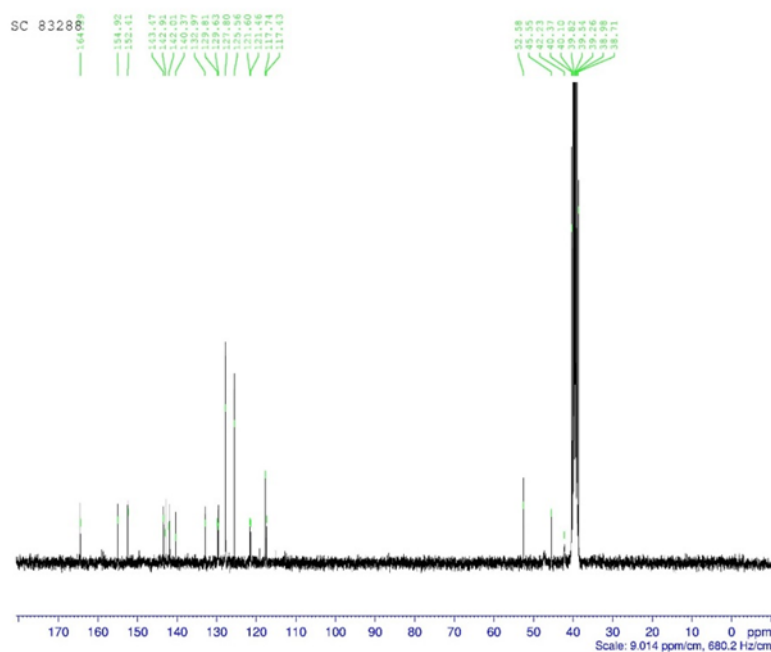

**Supplementary Figure 2: Characterization of SC09064, SC81458 and SC83288.** MS chromatogram (a), MS spectrum (b),  $^1\text{H}$  NMR spectrum (c) and  $^{13}\text{C}$  NMR spectrum (d) of the hit compound SC09064. MS chromatogram (e), MS spectrum (f),  $^1\text{H}$  NMR spectrum (g) and  $^{13}\text{C}$  NMR spectrum (h) of the lead compound SC81458. MS chromatogram (i), MS spectrum (j),  $^1\text{H}$  NMR spectrum (k) and  $^{13}\text{C}$  NMR spectrum (l) of the lead compound SC83288.

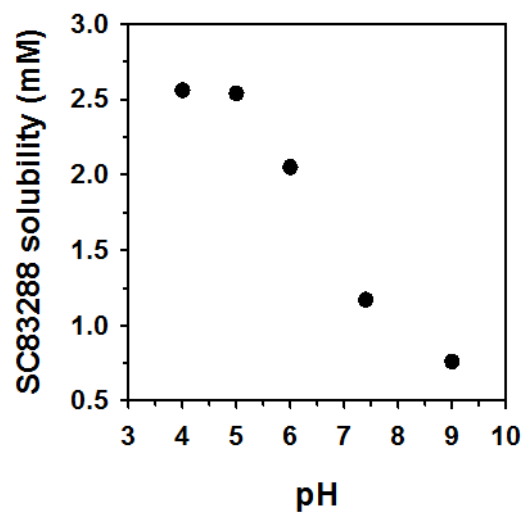

**Supplementary Figure 3: Solubility profile of SC83288 in phosphate buffered saline at different pH.**



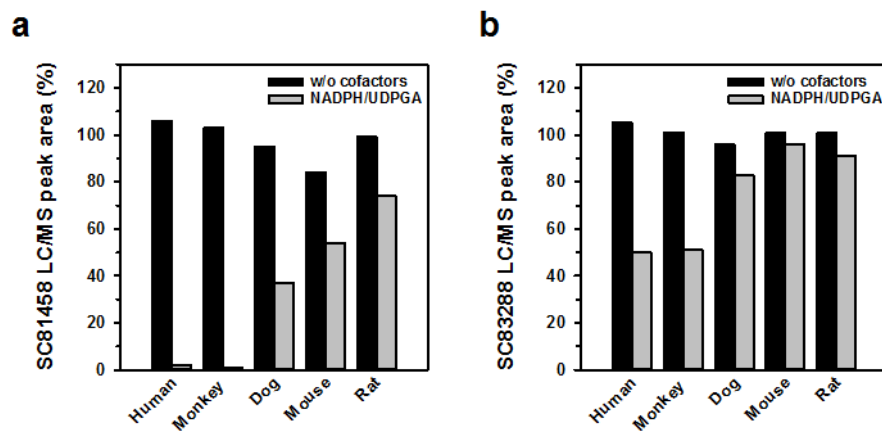

**Supplementary Figure 4: Stability of SC81458 and SC83288 in microsomal extracts from different species.** Relative LC/MS peak areas of SC81458 (a) or SC83288 (b) after 60 min of incubation at 37°C with (gray) and without (black) cofactors in microsomal extracts from human, monkey, dog, mouse, and rat.

**a**

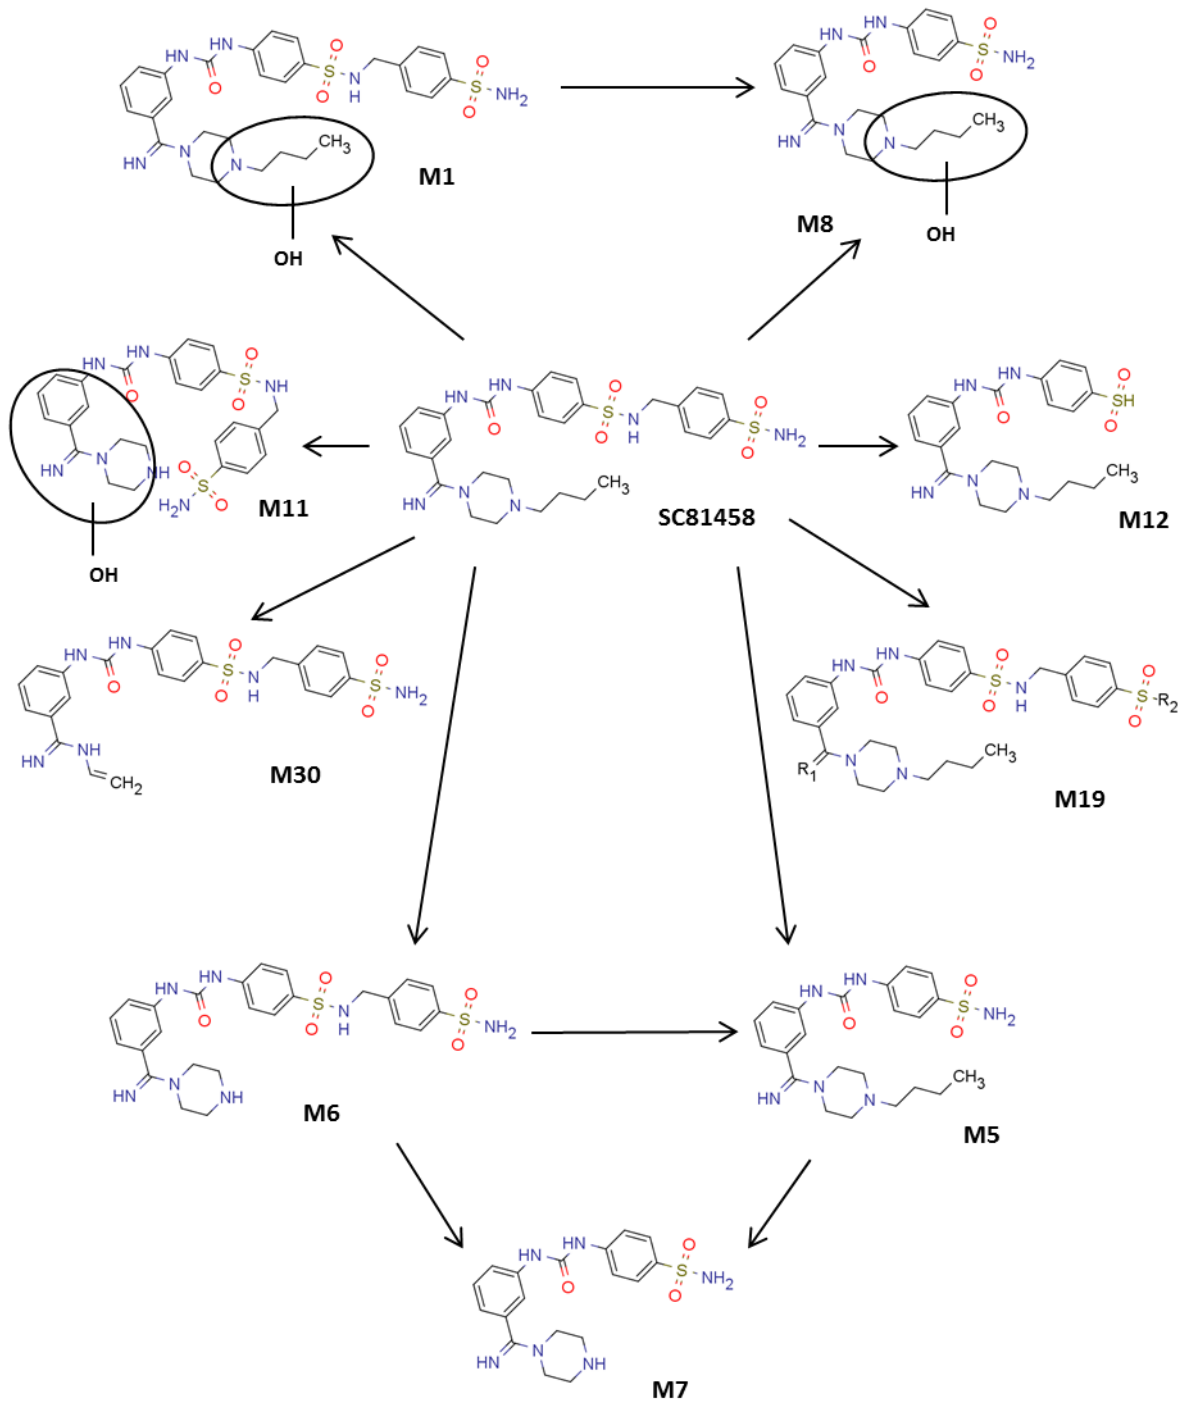

**b**

| Metabolite identification |                                                                                                          | m/z found                        | m/z calc.                        | Time (min) |
|---------------------------|----------------------------------------------------------------------------------------------------------|----------------------------------|----------------------------------|------------|
| SC81458                   | Parent                                                                                                   | 628.2374                         | 628.2376                         | 2.77       |
| M1                        | Hydroxylation in the butyl side chain or in piperazine ring                                              | 644.2320<br>529.1321<br>303.1822 | 644.2325<br>529.1325<br>303.1821 | 2.58       |
| M2                        | Hydroxylation (or N-oxidation)                                                                           | 644.2316                         | 644.2325                         | 2.49       |
| M3                        | Dehydrogenation                                                                                          | 626.2216                         | 626.2219                         | 2.72       |
| M4                        | Dehydrogenation + hydroxylation (or N-oxidation)                                                         | 642.2173                         | 642.2169                         | 2.6        |
| M5                        | N-dealkylation (loss of C7H7NSO2)                                                                        | 459.2179<br>3601132              | 459.2178<br>3601130              | 2.65       |
| M6                        | N-dealkylation (loss of C4H8)                                                                            | 572.1779                         | 572.1750                         | 2.38       |
| M7                        | N-dealkylation (loss of C4H8) + N-dealkylation (loss of C7H7NSO2)                                        | 403.1541                         | 403.1552                         | 1.35       |
| M8                        | Hydroxylation in the butyl side chain or in piperazine ring + N-dealkylation (loss of C7H7NSO2)          | 475.2127<br>360.1097             | 475.2128<br>360.1130             | 2          |
| M9                        | Dihydroxylation (/N-oxidation)                                                                           | 660.2282                         | 660.2274                         | 2.44       |
| M10                       | Dihydroxylation (/N-oxidation)                                                                           | 660.2292                         | 660.2274                         | 2.62       |
| M11                       | Hydroxylation/N-oxidation in area from piperazine ring to carbamide bond + N-dealkylation (loss of C4H8) | 588.1708<br>247.1183             | 588.1699<br>247.1195             | 2.47       |
| M12                       | S-N bond dissociation (loss of C7H8N2SO2)                                                                | 444.2072<br>287.1884<br>143.1554 | 444.2069<br>287.1872<br>143.1548 | 2.43       |
| M13                       | Dehydrogenation + (N-dealkylation (loss of C7H7NSO2)                                                     | 457.2025                         | 457.2022                         | 2.59       |
| M14                       | Dehydrogenation + (N-dealkylation (loss of C7H7NSO2)                                                     | 457.2033                         | 457.2022                         | 2.79       |
| M15                       | Hydroxylation (or N-oxidation)+ dehydrogenation + N-dealkylation (loss of C7H7NSO2)                      | 473.1971                         | 473.1971                         | 2.03       |
| M16                       | Hydroxylation (or N-oxidation)+ dehydrogenation + N-dealkylation (loss of C7H7NSO2)                      | 473.1977                         | 473.1971                         | 2.37       |
| M17                       | Hydroxylation (or N-oxidation)+ dehydrogenation + N-dealkylation (loss of C7H7NSO2)                      | 473.1974                         | 473.1971                         | 2.47       |
| M18                       | Hydroxylation (or N-oxidation)+ dehydrogenation + N-dealkylation (loss of C7H7NSO2)                      | 473.1982                         | 473.1971                         | 2.79       |
| M19                       | oxidative deamination                                                                                    | 629.222                          | 629.2216                         | 2.69       |
| M20                       | Dihydroxylation (or N-oxidation)+dehydrogenation                                                         | 658.2108                         | 658.2118                         | 2.32       |
| M21                       | Dihydroxylation (or N-oxidation)+dehydrogenation                                                         | 658.2114                         | 658.2118                         | 2.5        |
| M22                       | Dihydroxylation (or N-oxidation)+ dehydrogenation + N-dealkylation (loss of C7H7NSO2)                    | 489.1924                         | 489.1920                         | 1.39       |
| M23                       | Dihydroxylation (or N-oxidation)+ dehydrogenation + N-dealkylation (loss of C7H7NSO2)                    | 489.1921                         | 489.1920                         | 1.65       |
| M24                       | Dihydroxylation (or N-oxidation)+ dehydrogenation + N-dealkylation (loss of C7H7NSO2)                    | 489.1921                         | 489.1920                         | 1.74       |
| M25                       | Dihydroxylation (or N-oxidation)+ dehydrogenation + N-dealkylation (loss of C7H7NSO2)                    | 489.1925                         | 489.1920                         | 1.86       |
| M26                       | N-dealkylation (loss of C4H8)+ N-dealkylation (loss of C7H7NSO2)+acetylation                             | 447.1826                         | 447.1815                         | 1.6        |
| M27                       | Dehydrogenation + hydroxylation (or N-oxidation)                                                         | 642.2162                         | 642.2169                         | 2.65       |
| M28                       | Dehydrogenation                                                                                          | 626.2193                         | 626.2219                         | 2.87       |
| M29                       | dehydrogenation + hydroxylation (or N-oxidation)                                                         | 642.2173                         | 642.2169                         | 2.87       |
| M30                       | N-dealkylation (loss of C4H8NC2H5)                                                                       | 529.1328                         | 529.1328                         | 2.57       |

**C**

|         | Human (%)   | Monkey (%)  | Dog (%)     | Mouse (%)   | Rat (%)     |
|---------|-------------|-------------|-------------|-------------|-------------|
| SC81458 |             |             |             |             |             |
| M1      | <b>15</b>   | <b>29.2</b> | <b>24.7</b> | <b>18.8</b> | <b>41.9</b> |
| M2      | 0.1         | 0.2         | 0.2         | 1           | 0.4         |
| M3      | 0.1         |             | 1.3         | 0.5         | 1.3         |
| M4      | 2.4         | <b>8.7</b>  | 1.3         | 0.7         | 1.1         |
| M5      | <b>51.4</b> | 0.1         | 3.1         | <b>49</b>   | <b>23.3</b> |
| M6      | <b>7</b>    | <b>10.5</b> | <b>63.6</b> | <b>22.2</b> | <b>27.8</b> |
| M7      | 4.7         | <b>7.6</b>  | 1.6         | -           | 0.3         |
| M8      | <b>16.3</b> | <b>25.9</b> | 0.5         | 0.2         | 0.5         |
| M9      | 0.1         | 0.3         | 0.1         | -           | -           |
| M10     | 0.1         |             | 0.1         | -           | 0.4         |
| M11     | 0.1         | 0.3         | 3.1         | 3.8         | 1.8         |
| M12     | 0.2         | 0.1         | 0.1         | 0.5         | 0.3         |
| M13     | 1.3         |             | 0.1         | -           | 0.1         |
| M14     | 0.2         |             | -           | -           | -           |
| M15     | 0.6         | <b>10.5</b> | -           | -           | -           |
| M16     | 0.1         |             | -           | -           | -           |
| M17     | 0.1         |             | -           | -           | -           |
| M18     | 0.1         |             | -           | -           | -           |
| M19     | 0.2         | 0.1         | 0.3         | 0.6         | 0.4         |
| M20     | -           | .1          | 0.1         | -           | -           |
| M21     | -           | 1.7         | -           | -           | -           |
| M22     | -           | 0.2         | -           | -           | -           |
| M23     | -           | 0.2         | -           | -           | -           |
| M24     | -           | 0.2         | -           | -           | -           |
| M25     | -           | 0.8         | -           | -           | -           |
| M26     | -           | 2.5         | -           | -           | -           |
| M27     | -           | -           | -           | -           | 0.3         |
| M28     | -           | -           | -           | 0.5         | -           |
| M29     | -           | -           | -           | 0.4         | -           |
| M30     | -           | -           | -           | 1.8         | -           |

**Supplementary Figure 5: Metabolites and biotransformation of SC81458 in microsomal extracts.** (a) Suggested metabolic reactions and biotransformation sites of SC81458. (b) Description of the biotransformations leading to detected fragments by LC/ESI/TOF-MS analysis. (c) Shares of each SC81458 metabolite from the total combined metabolite peak area in each studied species. Main metabolites having share of 5% or more of the total combined peak area of all metabolites are bolded.

**A**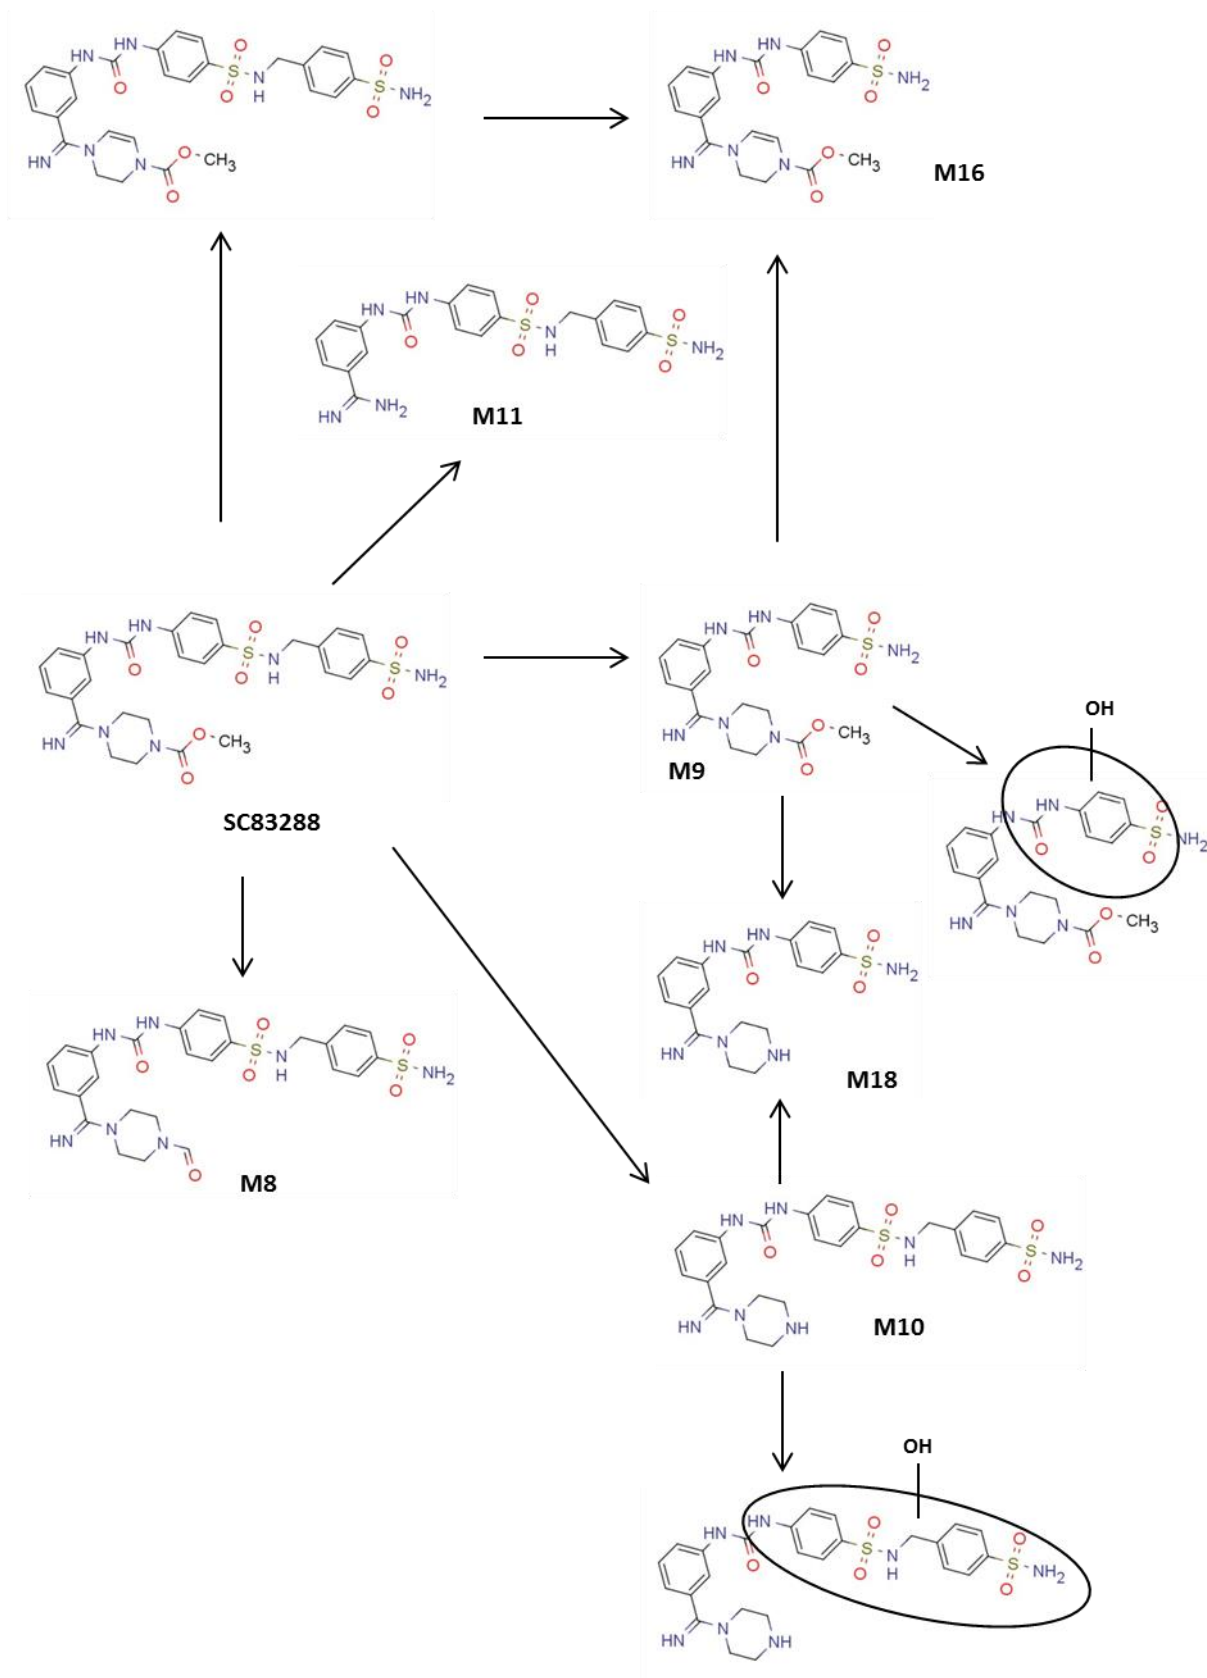

**b**

| Metabolite identification |                                                                                                                                                                                                                                                                                                | m/z found                        | m/z calc.                        | Time (min) |
|---------------------------|------------------------------------------------------------------------------------------------------------------------------------------------------------------------------------------------------------------------------------------------------------------------------------------------|----------------------------------|----------------------------------|------------|
| SC83288                   | Parent                                                                                                                                                                                                                                                                                         | 630.1797                         | 630.1805                         | 2.80       |
| M1                        | Hydroxylation/N-oxidation                                                                                                                                                                                                                                                                      | 646.1724                         | 646.1754                         | 3.16       |
| M2                        | Hydroxylation/N-oxidation                                                                                                                                                                                                                                                                      | 646.1727                         | 646.1754                         | 2.83       |
| M3                        | Hydroxylation/N-oxidation                                                                                                                                                                                                                                                                      | 646.1755                         | 646.1754                         | 2.79       |
| M4                        | Hydroxylation/N-oxidation                                                                                                                                                                                                                                                                      | 646.1756                         | 646.1754                         | 2.72       |
| M5                        | Dehydrogenation                                                                                                                                                                                                                                                                                | 628.1612                         | 628.1648                         | 2.86       |
| M6                        | 2 × Hydroxylation/N-oxidation                                                                                                                                                                                                                                                                  | 662.1668                         | 662.1703                         | 2.72       |
| M7                        | 2 × Hydroxylation/N-oxidation + hydrogenation                                                                                                                                                                                                                                                  | 664.1833                         | 664.1859                         | 2.68       |
| M8                        | Cleavage of CH <sub>2</sub> O                                                                                                                                                                                                                                                                  | 600.1713                         | 600.1699                         | 2.62       |
| M9                        | N-dealkylation (loss of C <sub>7</sub> H <sub>7</sub> NO <sub>2</sub> S)<br>Fragment (loss of C <sub>6</sub> H <sub>8</sub> N <sub>2</sub> O <sub>2</sub> S)                                                                                                                                   | 461.1611<br>289.1302             | 461.1607<br>289.1301             | 2.57       |
| M10                       | N-dealkylation (loss of C <sub>2</sub> H <sub>2</sub> O <sub>2</sub> )<br>Fragment (loss of C <sub>7</sub> H <sub>7</sub> NO <sub>2</sub> S)<br>Fragment (loss of C <sub>13</sub> H <sub>15</sub> N <sub>3</sub> O <sub>4</sub> S <sub>2</sub> )                                               | 572.1750<br>403.1552<br>231.1251 | 572.1750<br>403.1552<br>231.1246 | 2.30       |
| M11                       | Piperazine ring opening followed by N-dealkylation (loss of C <sub>6</sub> H <sub>9</sub> NO <sub>2</sub> )                                                                                                                                                                                    | 503.1166                         | 503.1171                         | 2.48       |
| M12                       | Hydroxylation/N-oxidation (to C <sub>6</sub> H <sub>7</sub> N <sub>2</sub> O <sub>2</sub> S -area) + N-dealkylation (loss of C <sub>7</sub> H <sub>7</sub> NO <sub>2</sub> S)<br>Fragment (loss of C <sub>6</sub> H <sub>8</sub> N <sub>2</sub> O <sub>3</sub> S)                              | 477.1537<br>289.1313             | 477.1556<br>289.1301             | 2.92       |
| M13                       | Hydroxylation/N-oxidation + N-dealkylation (loss of C <sub>7</sub> H <sub>7</sub> NO <sub>2</sub> S)                                                                                                                                                                                           | 477.1527                         | 477.1556                         | 2.47       |
| M14                       | Hydroxylation/N-oxidation + N-dealkylation (loss of C <sub>7</sub> H <sub>7</sub> NO <sub>2</sub> S)                                                                                                                                                                                           | 477.1547                         | 477.1556                         | 2.41       |
| M15                       | Hydroxylation/N-oxidation (to C <sub>13</sub> H <sub>14</sub> N <sub>3</sub> O <sub>4</sub> S <sub>2</sub> -area) + N-dealkylation (loss of C <sub>2</sub> H <sub>2</sub> O <sub>2</sub> )<br>Fragment (loss of C <sub>11</sub> H <sub>13</sub> N <sub>3</sub> O <sub>3</sub> S <sub>2</sub> ) | 588.1703<br>289.1305             | 588.1699<br>289.1301             | 2.63       |
| M16                       | Dehydrogenation + N-dealkylation (loss of C <sub>7</sub> H <sub>7</sub> NO <sub>2</sub> S)                                                                                                                                                                                                     | 459.1466                         | 459.1451                         | 2.63       |
| M17                       | 2 × Hydroxylation/N-oxidation + hydrogenation + N-dealkylation (loss of C <sub>7</sub> H <sub>7</sub> NO <sub>2</sub> S)                                                                                                                                                                       | 495.1657                         | 495.1662                         | 2.42       |
| M18                       | N-dealkylation (loss of C <sub>7</sub> H <sub>7</sub> NO <sub>2</sub> S) + N-dealkylation (loss of C <sub>2</sub> H <sub>2</sub> O <sub>2</sub> )<br>Fragment (loss of C <sub>6</sub> H <sub>8</sub> N <sub>2</sub> O <sub>2</sub> S)                                                          | 4031.548<br>231.1251             | 403.1552<br>231.1246             | 0.57       |
| M19                       | Hydroxylation/N-oxidation + N-dealkylation (loss of C <sub>7</sub> H <sub>7</sub> NO <sub>2</sub> S) + N-dealkylation (loss of C <sub>2</sub> H <sub>2</sub> O <sub>2</sub> )                                                                                                                  | 419.1515                         | 419.1502                         | 2.32       |
| M20                       | 2 × Hydroxylation/N-oxidation + N-dealkylation (loss of C <sub>7</sub> H <sub>7</sub> NO <sub>2</sub> S) + N-dealkylation (loss of C <sub>2</sub> H <sub>2</sub> O <sub>2</sub> )                                                                                                              | 435.1467                         | 435.1451                         | 2.44       |

**c**

|         | Human (%)   | Monkey (%)  | Dog (%)     | Mouse (%)   | Rat (%)     |
|---------|-------------|-------------|-------------|-------------|-------------|
| SC83288 |             |             |             |             |             |
| M1      | -           | -           | -           | -           | 0.7         |
| M2      | -           | 0.2         | -           | -           | 0.7         |
| M3      | -           | -           | -           | -           | 1.1         |
| M4      | 1.2         | 1.4         | 1.1         | <b>14.3</b> | 3.5         |
| M5      | 0.2         | 0.4         | -           | 2.2         | 0.3         |
| M6      | 0.1         | 0.2         | -           | 2.6         | 0.6         |
| M7      | 0.4         | 0.6         | -           | 3.4         | 0.9         |
| M8      | 0.1         | 0.2         | 0.5         | 0.9         | 0.6         |
| M9      | <b>82</b>   | <b>72.3</b> | 4.8         | <b>69.9</b> | <b>69</b>   |
| M10     | <b>13.3</b> | <b>16.2</b> | <b>87.3</b> | <b>5</b>    | <b>19.7</b> |
| M11     | 0.9         | 1.1         | -           | -           | -           |
| M12     | 0.2         | 0.1         | -           | 0.5         | 0.6         |
| M13     | 0.3         | 0.3         | -           | -           | -           |
| M14     | 0.2         | 0.3         | -           | -           | -           |
| M15     | 0.2         | 0.6         | <b>6.3</b>  | 1.5         | 2           |
| M16     | 0.2         | 0.2         | -           | -           | -           |
| M17     | 0.1         | 0.2         | -           | -           | -           |
| M18     | 0.3         | <b>5.4</b>  | -           | -           | 0.3         |
| M19     | -           | 0.2         | -           | -           | -           |
| M20     | 0.2         | 0.2         | -           | -           | -           |

**Supplementary Figure 6: Metabolites and biotransformation of SC83288 in microsomal extracts.** (a) Suggested metabolic reactions and biotransformation sites of SC83288. (b) Description of the biotransformations leading to the detected fragments by LC/ESI/TOF-MS analysis. (c) Shares of each SC83288 metabolite from the total combined metabolite peak area in each studied species. Main metabolites having share of 5% or more of the total combined peak area of all metabolites are bolded.

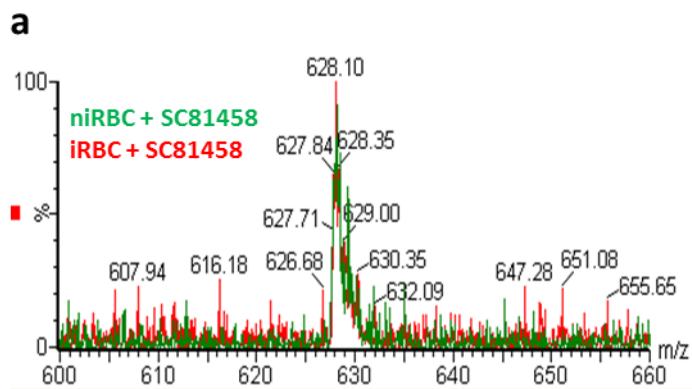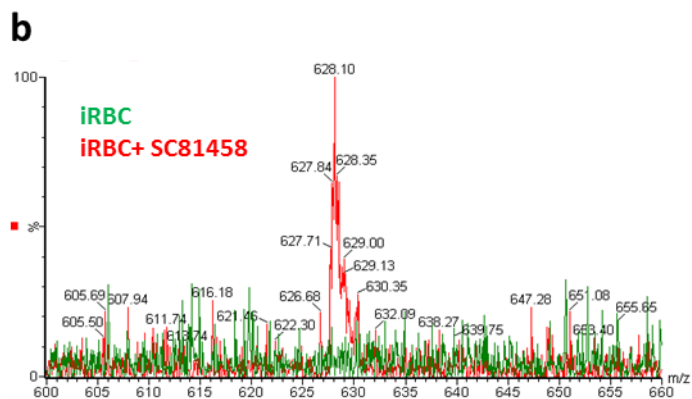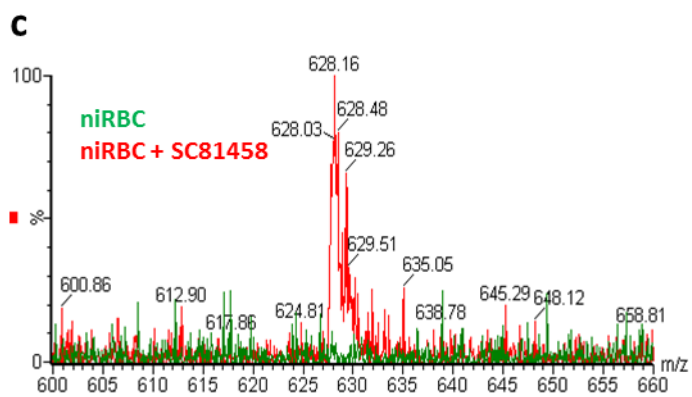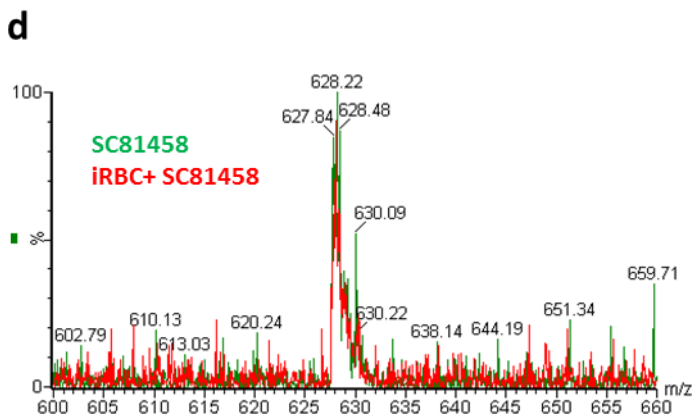



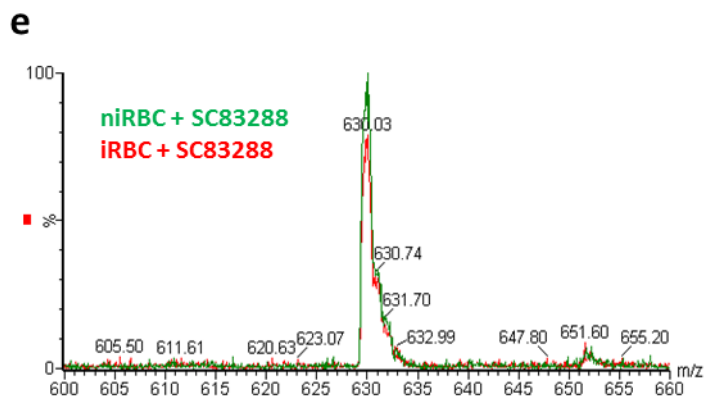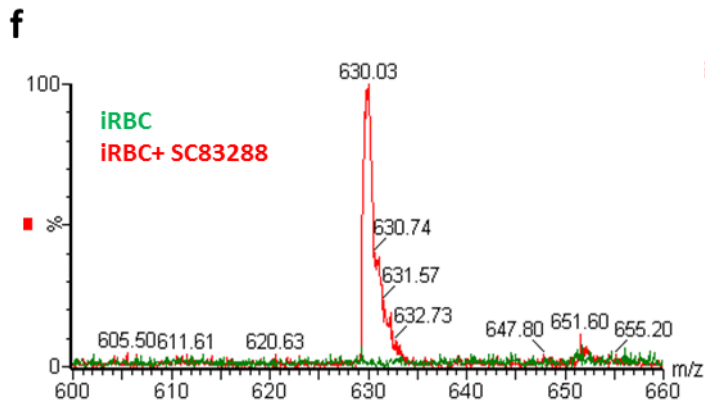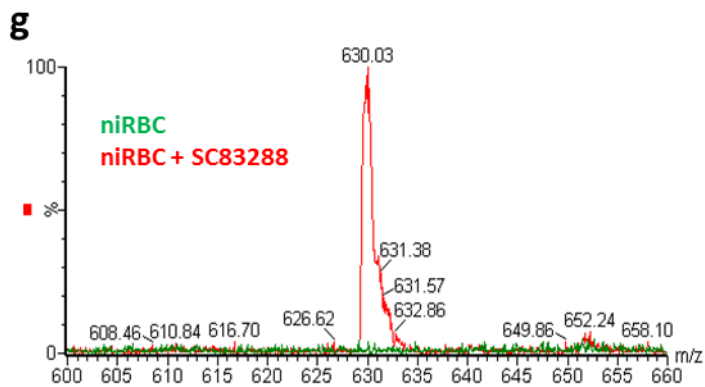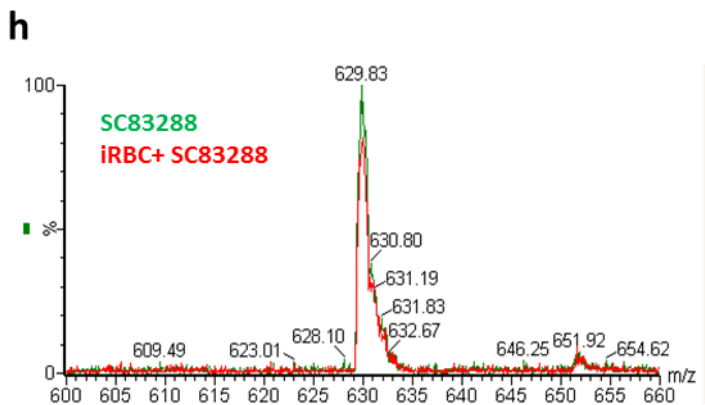

**Supplementary Figure 7: Stability of SC81458 and SC83288 in blood cell culture.** SC81458 and SC83288 (2  $\mu$ M) were incubated with *P. falciparum*-infected erythrocytes, uninfected erythrocytes, or without any cells for 6 h at 37°C before the integrity of the

compound was investigated using MS chromatography following acetonitrile precipitation. **(a, e)** SC81458 **(a)** and SC83288 **(e)** with infected erythrocytes (iRBC, red) or uninfected erythrocytes (niRBC, green). **(b, f)** Infected erythrocytes incubated with 0.04 % DMSO/PBS (iRBC, green) or infected erythrocytes incubated with SC81458 **(b; iRBC+SC81458, red)** or SC83288 **(f; iRBC+SC83288, red)**. **(c, g)** Uninfected erythrocytes incubated with 0.04 % DMSO/PBS (niRBC, green) or uninfected erythrocytes incubated with SC81458 **(c; niRBC+SC81458, red)** or SC83288 **(g; niRBC+SC83288, red)**. **(d, h)** Infected erythrocytes incubated with SC81458 **(d; iRBC+SC81458, red)** or SC83288 **(h; iRBC+SC83288, red)**, and SC81458 **(d; SC81458, green)** or SC83288 **(h; SC83288, green)** incubated in culture medium.

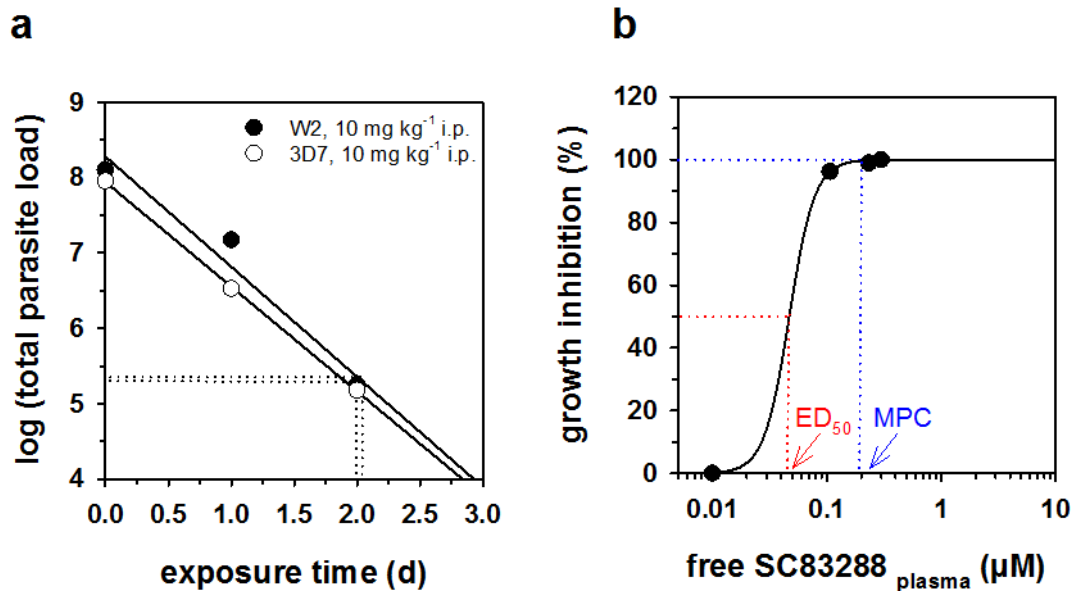

**Supplementary Figure 8: Cure rate of SC83288.** (a) Reduction of the parasite load in NSG mice engrafted with human erythrocytes with time following treatment with 10 mg kg<sup>-1</sup> i.p. SC83288 once a day for four days. The data were taken from Figures 6C and D. The percent parasitemia was converted to total parasite load by assuming a total red blood cell count per mouse of  $\sim 1.5 \times 10^{10}$  red blood cells<sup>1</sup>. The dotted lines show the parasite reduction ratio (PRR), i.e. the reduction of the parasite load over one asexual replication cycle of the parasite, here 48 h. (b) Inhibition of *P. falciparum* growth in NSG mice engrafted with human erythrocytes after 2 days treatment with 10 mg kg<sup>-1</sup> i.p. SC83288. Growth inhibition is analyzed as a function of the free SC83288 plasma concentration. The minimum parasiticidal concentration (MPC) and the ED<sub>50</sub> are depicted as blue and red dotted lines, respectively.

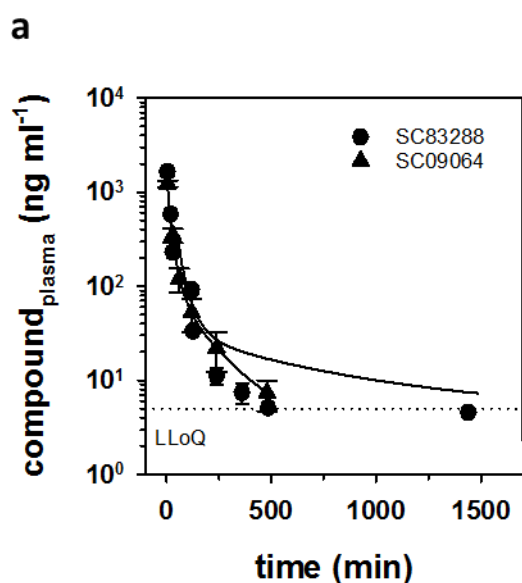

**b**

| Compound                                      | SC83288 | SC09064 |
|-----------------------------------------------|---------|---------|
| Application                                   | i.v.    |         |
| Species                                       | rat     |         |
| Dose (mg kg <sup>-1</sup> )                   | 1       | 1       |
| AUC <sub>0-inf</sub> (ng h ml <sup>-1</sup> ) | 709     | 732     |
| C <sub>0</sub> (ng ml <sup>-1</sup> )         | 2188    | 1409    |
| C <sub>max</sub> (ng ml <sup>-1</sup> )       | 1641    | 1225    |
| t <sub>max</sub> (min)                        | 5       | 5       |
| t <sub>1/2</sub> initial (min)                | 9       | 16      |
| t <sub>1/2</sub> terminal (min)               | 625     | 131     |
| t <sub>1/2</sub> effective (min)              | 52      | 44      |
| MRT <sub>0-t</sub> (h)                        | 1.25    | 1.05    |
| CL (ml h <sup>-1</sup> kg <sup>-1</sup> )     | 1410    | 1366    |
| V <sub>C</sub> (ml kg <sup>-1</sup> )         | 457     | 710     |

**c**

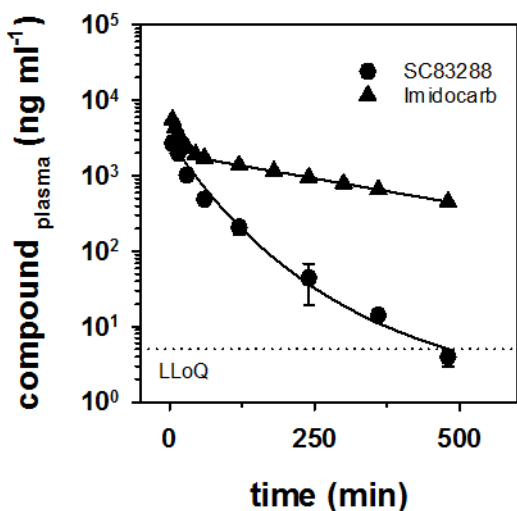

**d**

| Compound                                      | SC83288 | Imidocarb |
|-----------------------------------------------|---------|-----------|
| Application                                   | i.v.    |           |
| Species                                       | dog     |           |
| Dose (mg kg <sup>-1</sup> )                   | 1       | 1         |
| AUC <sub>0-inf</sub> (ng h ml <sup>-1</sup> ) | 1331    | 11922     |
| C <sub>0</sub> (ng ml <sup>-1</sup> )         | 3282    | 6801      |
| C <sub>max</sub> (ng ml <sup>-1</sup> )       | 2685    | 5518      |
| t <sub>max</sub> (min)                        | 5       | 5         |
| t <sub>1/2</sub> initial (min)                | 12      | 21        |
| t <sub>1/2</sub> terminal (min)               | 90      | 224       |
| t <sub>1/2</sub> effective (min)              | 35      | 112       |
| MRT <sub>0-t</sub> (h)                        | 0.84    | 2.70      |
| CL (ml h <sup>-1</sup> kg <sup>-1</sup> )     | 751     | 84        |
| V <sub>C</sub> (ml kg <sup>-1</sup> )         | 305     | 147       |

**Supplementary Figure 9: Comparison of the pharmacokinetic profiles of SC09064, SC83288, and imidocarb.** (a) Mean plasma concentration (normalized to a dose of 1 mg kg<sup>-1</sup>) of SC09064 (closed triangles) and SC83288 (closed circles) over time following i.v. administration in rats of 0.25 mg kg<sup>-1</sup> and 2 mg kg<sup>-1</sup>, respectively. The mean ± SEM are shown for at least three animals. Data for SC09064 were examined using a non-compartment analysis and relevant PK parameters are summarized in (b). (c) Mean plasma concentration (normalized to a dose of 1 mg kg<sup>-1</sup>) of SC83288 (closed circles) and imidocarb (closed triangles) over time following i.v. administration in dogs of 2 mg kg<sup>-1</sup> and 4 mg kg<sup>-1</sup>. The mean ± SEM are shown for at least three animals treated with SC83288. Data for imidocarb were extracted from Abdullah and Baggot (1983)<sup>2</sup> and relevant PK parameters are listed in (d). The dotted lines show the lower limit of quantification (LLoQ).

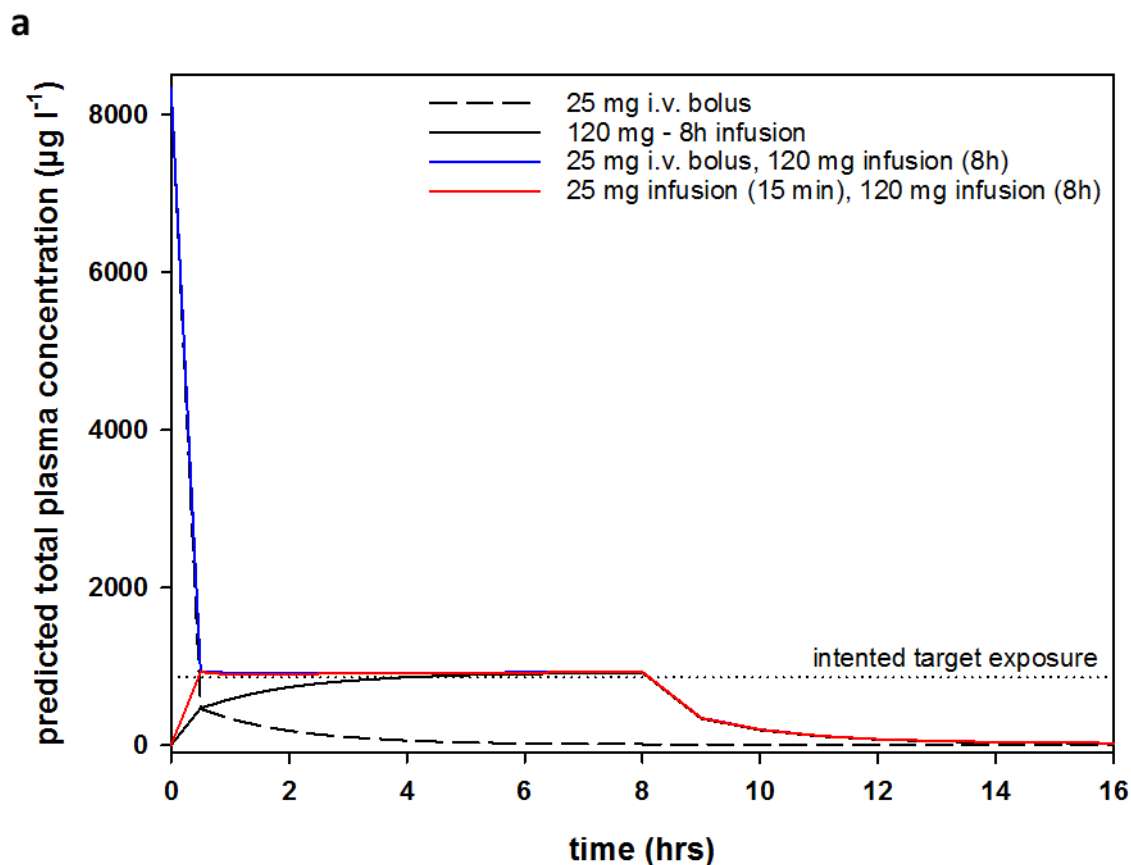

**b**

| Parameter                              | Estimate | StdError | CV (%) |
|----------------------------------------|----------|----------|--------|
| $K_p$                                  | 0.495    | 0.121    | 24.5   |
| fd1                                    | 0.146    | 0.070    | 47.9   |
| fd2                                    | 0.009    | 0.002    | 23.6   |
| b                                      | 0.756    | 0.018    | 2.30   |
| a                                      | 0.611    | 0.061    | 10.0   |
| c                                      | 0.347    | 0.053    | 15.2   |
| <b>Clearance (secondary parameter)</b> |          |          |        |
| $CL_{\text{mouse}}$                    | 0.042    | 0.005    | 12.0   |
| $CL_{\text{monkey}}$                   | 1.800    | 0.184    | 10.2   |
| $CL_{\text{rat}}$                      | 0.225    | 0.023    | 10.4   |
| $CL_{\text{man}}$                      | 15.189   | 1.860    | 12.2   |

**Supplementary Figure 10: Simulations of human PK profiles of SC83288 utilizing a minimal physiologically-based PK model. (a)** Simulation of various dosing schemes. i.v. bolus of 25mg (dotted line); 8 hour infusion of 120 mg (black solid line); i.v. bolus of 25 mg as loading dose, followed by 8 hour infusion of 120 mg (blue solid line); and a combination of 15 min infusion of 25 mg followed by 8 hour infusion of 120 mg (red solid line). **(b)** Final parameter estimates and precisions of the fit of preclinical plasma PK data to mPBPK model.

**a**  
PF3D7\_1241800 (DEAD/DEAH box ATP-dependent RNA helicase, putative)

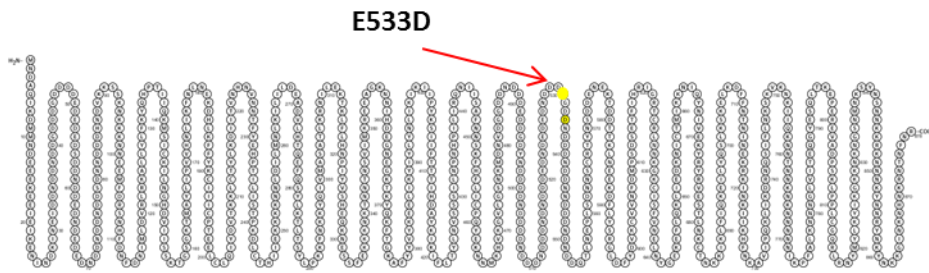

**b**  
PF3D7\_1447900 (PfMDR2)

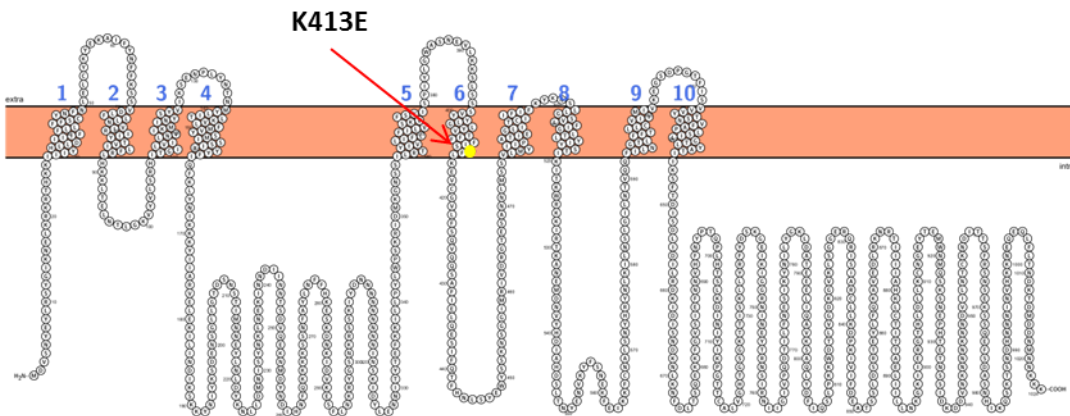

**c**  
PF3D7\_0106300 (PfATP6)

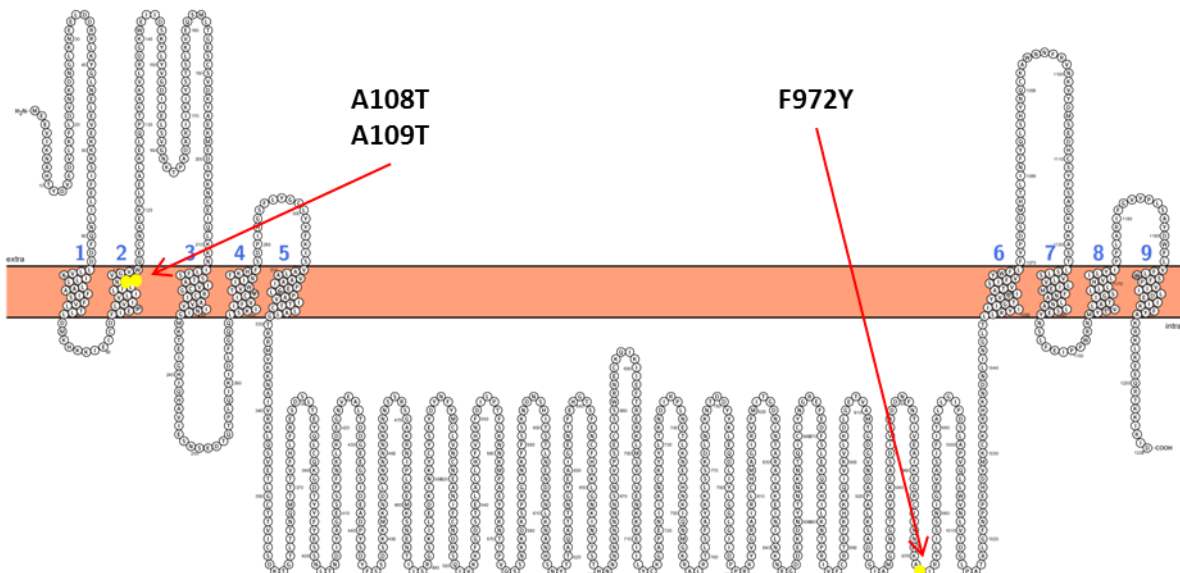

d

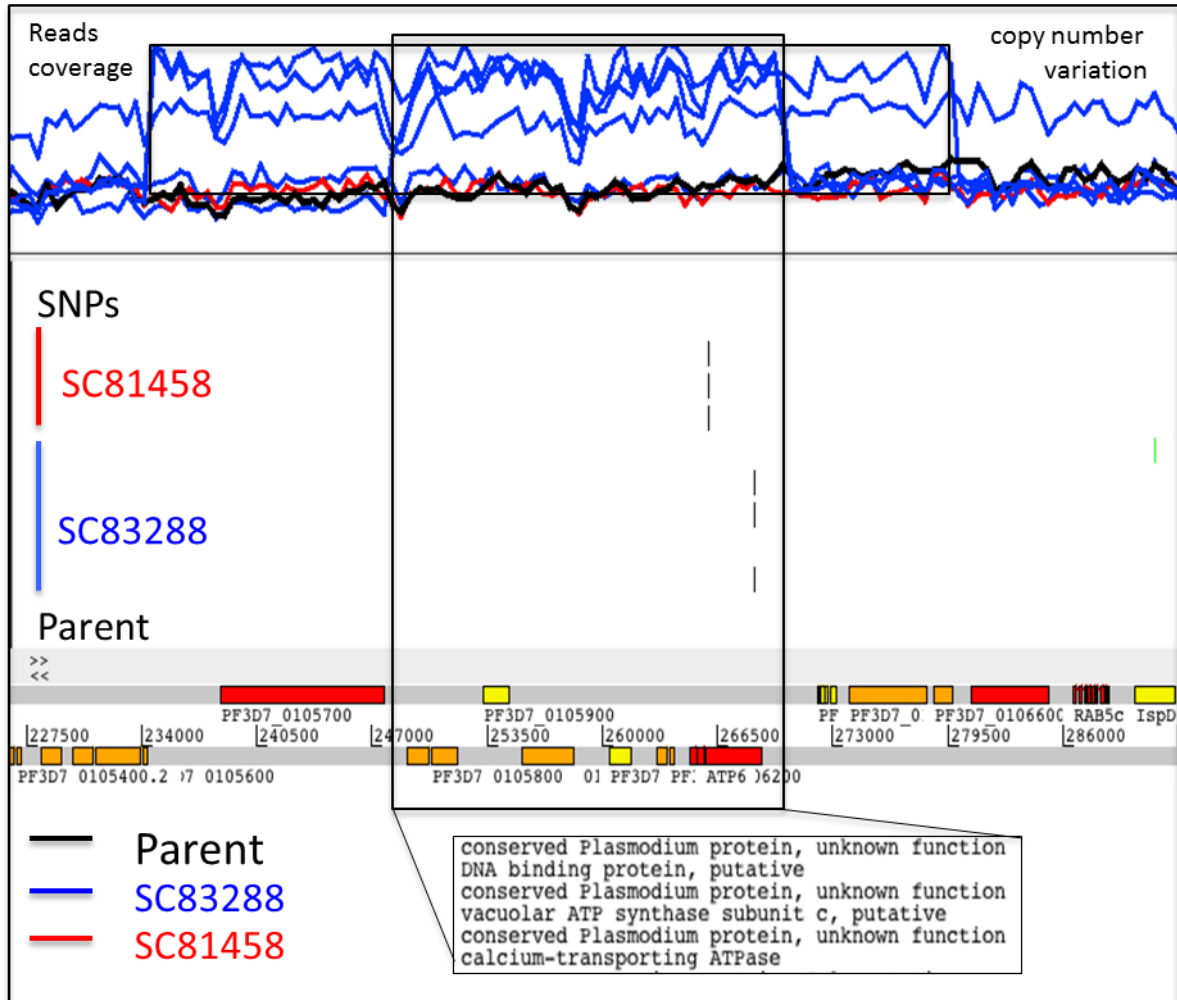

**Supplementary Figure 11: Topological models and polymorphisms identified in gene products associated with SC81458 and SC83288 resistance.** (a) The putative ATP-dependent RNA helicase DBP9, (b) PfMDR2; (c) PfATP6. The models were generated using the online tool Protter (version 1.0)<sup>3</sup>. (d) Snap shot showing amplification of the chromosome 1 domain containing PfATP6 in SC81458 and SC83288 selected clones.

**a**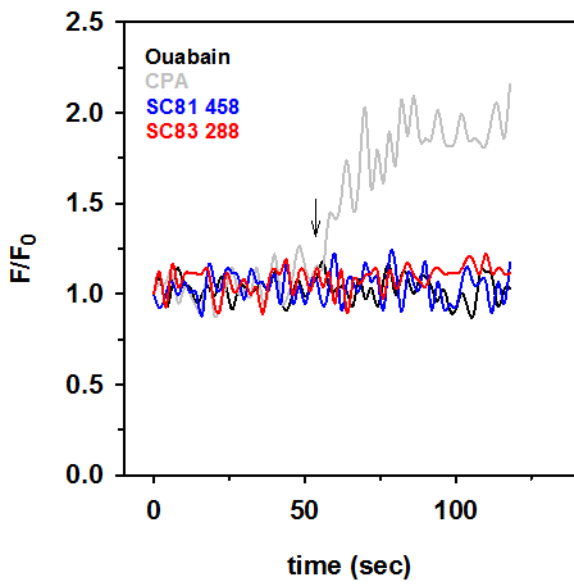**b**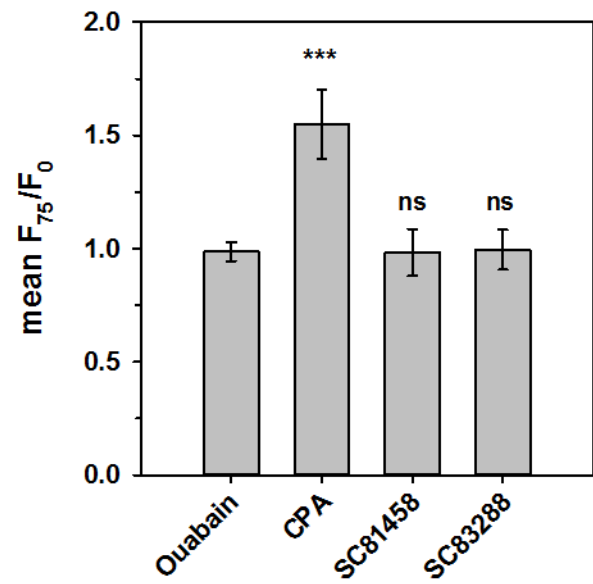

**Supplementary Figure 12: SC81458 and SC83288 do not induced cytoplasmic  $\text{Ca}^{2+}$  responses in *P. falciparum*.** *P. falciparum*-infected erythrocytes (trophozoites of the HB3 strain) were stained with the  $\text{Ca}^{2+}$  sensitive fluorochrome Fluo 4-AM (10  $\mu\text{M}$ ) and cytoplasmic  $\text{Ca}^{2+}$  transients were recorded in response to SC81458 (blue; 10  $\mu\text{M}$ ), SC83288 (red; 10  $\mu\text{M}$ ), ouabain (black; 10  $\mu\text{M}$ ), and CPA (gray; 10  $\mu\text{M}$ ), using a confocal live cell setup. **(a)** Representative  $\text{Ca}^{2+}$  traces in the parasite's cytoplasm. The mean fluorescence intensity ( $F$ ) was normalized to the fluorescence intensity at time point zero ( $F_0$ ). **(b)** The mean fluorescence intensity at time point 75 sec ( $F_{75}$ ) was normalized to the fluorescence intensity at time point zero ( $F_0$ ). The mean  $\pm$  SEM are shown for at least five independent biological replicates with at least eight determinations in each replicate. Statistical significance was evaluated using the one way ANOVA Holm-Sidak test. \*\*\*,  $p < 0.001$ .



## Supplementary Table 1: Compounds tested.

### East-side optimization

#### East-Aryl-sulfone chain influence

|                     | 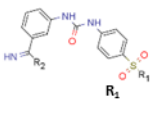   | R <sub>2</sub>                                                                      | IC <sub>50</sub> [nM] |
|---------------------|-------------------------------------------------------------------------------------|-------------------------------------------------------------------------------------|-----------------------|
| SC08165<br>(423 Da) |    | -NH <sub>2</sub>                                                                    | 134                   |
| SC08985<br>(422 Da) |    | -NH <sub>2</sub>                                                                    | 2990                  |
| SC09231<br>(477 Da) |    | -NH <sub>2</sub>                                                                    | 13,2                  |
| SC43796<br>(466 Da) |    | -NH <sub>2</sub>                                                                    | 46,9                  |
| SC80166<br>(576 Da) |    |    | 14,6                  |
| SC81475<br>(598 Da) |    |    | 598                   |
| SC82341<br>(603 Da) |    |    | 544                   |
| SC82343<br>(549 Da) |    |    | 595                   |
| SC82746<br>(529 Da) |   |   | 2580                  |
| SC82893<br>(547 Da) |  |  | 6250                  |
| SC82894<br>(375 Da) |  | -NH <sub>2</sub>                                                                    | 365                   |
| SC82895<br>(501 Da) |  |  | 1760                  |
| SC85259<br>(642 Da) |  |  | 224                   |
| SC85343<br>(565 Da) |  |  | 1550                  |
| SC86048<br>(640 Da) |  |  | 73,4                  |
| SC86610<br>(663 Da) |  |  | 894                   |
| SC86714<br>(645 Da) |  |  | 873                   |
| SC87211<br>(634 Da) |  |  | 42,1                  |

#### East-Aryl side-chain influence

|                     | 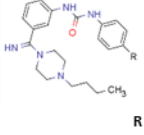  | IC <sub>50</sub> [nM] |
|---------------------|------------------------------------------------------------------------------------|-----------------------|
| SC86354<br>(617 Da) |  | 1710                  |
| SC86943<br>(515 Da) |  | 739                   |

# West-side optimization

## Piperazine chain influence

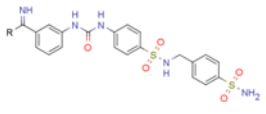

| R                          | IC <sub>50</sub> [nM] | R                   | IC <sub>50</sub> [nM] | R                          | IC <sub>50</sub> [nM] | R                   | IC <sub>50</sub> [nM] |
|----------------------------|-----------------------|---------------------|-----------------------|----------------------------|-----------------------|---------------------|-----------------------|
| <b>Piperazine chain</b>    |                       |                     |                       |                            |                       |                     |                       |
| SC81452<br>(616 Da)        | 100                   | SC87409<br>(628 Da) | 285                   | SC82686<br>(644 Da)        | 4,4                   | SC77225<br>(587 Da) | 165                   |
| <b>SC81458</b><br>(628 Da) | 8                     | SC87507<br>(573 Da) | 139                   | SC82693<br>(672 Da)        | 606                   | SC81450<br>(585 Da) | 278                   |
| SC82342<br>(628 Da)        | 4,1                   | SC87508<br>(600 Da) | 834                   | SC82694<br>(686 Da)        | 859                   | SC81452<br>(616 Da) | 100                   |
| SC82365<br>(600 Da)        | 24,9                  | SC87860             | 626                   | SC83287<br>(614 Da)        | 25,4                  | SC81453<br>(602 Da) | 282                   |
| SC82367<br>(614 Da)        | 7                     | SC87866<br>(615 Da) | 263                   | <b>SC83288</b><br>(630 Da) | 3                     | SC81454<br>(575 Da) | 201                   |
| SC82486<br>(614 Da)        | 38,3                  | SC87867<br>(626 Da) | 10                    | SC83289<br>(628 Da)        | 3,8                   | SC81455<br>(589 Da) | 242                   |
| SC82487<br>(670 Da)        | 196                   | SC87868<br>(658 Da) | 37,3                  | SC83290<br>(656 Da)        | 24,8                  | SC81456<br>(619 Da) | 496                   |
| SC82508<br>(614 Da)        | 5,8                   | SC87869<br>(656 Da) | 53,9                  | SC83311<br>(658 Da)        | 11,6                  | SC81457<br>(614 Da) | 149                   |
| SC82682<br>(586 Da)        | 277                   | SC87870<br>(630 Da) | 30                    | SC87410<br>(743 Da)        | 743                   | SC82687<br>(663 Da) | 995                   |
| SC82833<br>(642 Da)        | 13,2                  | SC88381<br>(643 Da) | 2570                  | <b>Alkylating amine</b>    |                       | SC82692<br>(662 Da) | 209                   |
| SC82904<br>(572 Da)        | 98,3                  | SC88464<br>(644 Da) | 125                   | SC82683<br>(600 Da)        | 117                   | SC85039<br>(621 Da) | 41,4                  |
| SC86669<br>(641 Da)        | 11,5                  |                     |                       | SC82684<br>(640 Da)        | 34                    |                     |                       |
|                            |                       |                     |                       | SC82689<br>(600 Da)        | 146                   |                     |                       |
|                            |                       |                     |                       | SC82832<br>(557 Da)        | 176                   |                     |                       |
|                            |                       |                     |                       | SC82869<br>(616 Da)        | 88,7                  |                     |                       |
|                            |                       |                     |                       | SC82870<br>(602 Da)        | 73,6                  |                     |                       |
|                            |                       |                     |                       | SC82871<br>(588 Da)        | 110                   |                     |                       |
|                            |                       |                     |                       | SC82872<br>(701 Da)        | 136                   |                     |                       |
|                            |                       |                     |                       | SC82905<br>(586 Da)        | 75,2                  |                     |                       |
| <b>Polar groups</b>        |                       |                     |                       |                            |                       |                     |                       |

## West-side optimization

### Imine chain influence

|                                       | R <sub>1</sub> | R <sub>2</sub>   | R <sub>3</sub> | IC <sub>50</sub> [nM] |
|---------------------------------------|----------------|------------------|----------------|-----------------------|
| SC88408<br>(506 g mol <sup>-1</sup> ) | -OH            | -NH <sub>2</sub> |                | > 16 μM               |
| SC89127<br>(646 g mol <sup>-1</sup> ) | -OH            |                  |                | 948                   |
| SC90436<br>(672 g mol <sup>-1</sup> ) |                |                  |                | 219                   |
| SC90478<br>(756 g mol <sup>-1</sup> ) |                |                  |                | 1910                  |
| SC90761<br>(515 g mol <sup>-1</sup> ) |                |                  | -H             | 308                   |

## Linker optimization

| R                                         | IC <sub>50</sub> [nM] | Linker                                    |
|-------------------------------------------|-----------------------|-------------------------------------------|
|                                           |                       | <i>Benzene linker</i>                     |
|                                           |                       | IC <sub>50</sub> [nM]                     |
|                                           |                       | SC86755<br>(494 g mol <sup>-1</sup> )<br> |
|                                           |                       | > 16 μM                                   |
|                                           |                       | SC86756<br>(494 g mol <sup>-1</sup> )<br> |
|                                           |                       | > 10 μM                                   |
|                                           |                       | <i>Diaryl urea linker</i>                 |
| SC83332<br>(613 g mol <sup>-1</sup> )<br> | 372                   |                                           |
| SC84185<br>(627 g mol <sup>-1</sup> )<br> | 7160                  |                                           |
| SC84539<br>(627 g mol <sup>-1</sup> )<br> | 870                   |                                           |
|                                           |                       | <i>Middle N-alkyl linker</i>              |
| SC85194<br>(543 g mol <sup>-1</sup> )<br> | > 16 μM               |                                           |
| SC85219<br>(585 g mol <sup>-1</sup> )<br> | > 16 μM               |                                           |

## West-side aryl substitution influence

|                                       | R <sub>1</sub> | R <sub>2</sub> | IC <sub>50</sub> [nM] |
|---------------------------------------|----------------|----------------|-----------------------|
| SC08323<br>(439 g mol <sup>-1</sup> ) |                | -H             | 226                   |
| SC08324<br>(439 g mol <sup>-1</sup> ) | -H             |                | 357                   |
| SC09457<br>(526 g mol <sup>-1</sup> ) |                | -H             | > 16 μM               |
| SC12599<br>(466 g mol <sup>-1</sup> ) | -Cl            | -Cl            | 4070                  |
| SC47789<br>(510 g mol <sup>-1</sup> ) |                | -H             | 88,7                  |
| SC47790<br>(494 g mol <sup>-1</sup> ) |                | -H             | 61,9                  |
| SC47791<br>(523 g mol <sup>-1</sup> ) |                | -H             | 122                   |
| SC47793<br>(524 g mol <sup>-1</sup> ) |                | -H             | 31,8                  |
| SC47830<br>(455 g mol <sup>-1</sup> ) |                | -H             | > 16 μM               |
| SC47946<br>(440 g mol <sup>-1</sup> ) |                | -H             | 6210                  |
| SC48019<br>(497 g mol <sup>-1</sup> ) |                | -H             | 1580                  |
| SC48020<br>(512 g mol <sup>-1</sup> ) |                | -H             | 750                   |
| SC48021<br>(540 g mol <sup>-1</sup> ) |                | -H             | 1820                  |
| SC48022<br>(540 g mol <sup>-1</sup> ) |                | -H             | 1400                  |
| SC80504<br>(525 g mol <sup>-1</sup> ) |                | -H             | 7190                  |
| SC80548<br>(524 g mol <sup>-1</sup> ) | -H             |                | 71,5                  |
| SC80613<br>(440 g mol <sup>-1</sup> ) | -H             |                | 3350                  |

## Simultaneous West- and East-side optimization

| 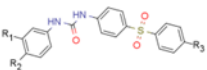 |                                                                                     |                                                                                   |                          |  |                                                                                    |                                                                                    |                                                                                     |                                                                                       |                                                                                     |      |
|-----------------------------------------------------------------------------------|-------------------------------------------------------------------------------------|-----------------------------------------------------------------------------------|--------------------------|-----------------------------------------------------------------------------------|------------------------------------------------------------------------------------|------------------------------------------------------------------------------------|-------------------------------------------------------------------------------------|---------------------------------------------------------------------------------------|-------------------------------------------------------------------------------------|------|
| R1                                                                                | R2                                                                                  | R3                                                                                | IC <sub>50</sub><br>[nM] | R1                                                                                | R2                                                                                 | R3                                                                                 | R                                                                                   | IC <sub>50</sub><br>[nM]                                                              |                                                                                     |      |
| SC48443<br>(473 g mol <sup>-1</sup> )                                             |    | -H                                                                                | -Br                      | 63,9                                                                              | SC81509<br>(494 g mol <sup>-1</sup> )                                              |   | -H                                                                                  | -NH <sub>2</sub>                                                                      |  | 4170 |
| SC77215<br>(557 g mol <sup>-1</sup> )                                             |    | -H                                                                                | -Br                      | 67,9                                                                              | SC08666<br>(454 g mol <sup>-1</sup> )                                              |   | -H                                                                                  |    |  | 864  |
| SC80508<br>(513 g mol <sup>-1</sup> )                                             |    | -H                                                                                | -Cl                      | 37,5                                                                              | SC09187<br>(482 g mol <sup>-1</sup> )                                              |   | -H                                                                                  |    |  | 3470 |
| SC80549<br>(430 g mol <sup>-1</sup> )                                             |    | -H                                                                                | -Cl                      | 3270                                                                              | SC48124<br>(409 g mol <sup>-1</sup> )                                              | -H                                                                                 |    | -NH <sub>2</sub>                                                                      |  | 1020 |
| SC80697<br>(557 g mol <sup>-1</sup> )                                             | -H                                                                                  |  | -Br                      | 200                                                                               | SC48125<br>(409 g mol <sup>-1</sup> )                                              |   | -H                                                                                  | -NH <sub>2</sub>                                                                      |  | 289  |
| SC81468<br>(571 g mol <sup>-1</sup> )                                             |    | -H                                                                                | -Br                      | 1450                                                                              |  |                                                                                    |                                                                                     |                                                                                       |                                                                                     |      |
| SC81471<br>(589 g mol <sup>-1</sup> )                                             |    | -H                                                                                | -Br                      | 2390                                                                              | <b>R1</b>                                                                          | <b>R2</b>                                                                          | <b>R3</b>                                                                           | <b>IC<sub>50</sub><br/>[nM]</b>                                                       |                                                                                     |      |
| SC81472<br>(560 g mol <sup>-1</sup> )                                             |    | -H                                                                                | -Br                      | 51,2                                                                              | SC48092<br>(488 g mol <sup>-1</sup> )                                              |   | -H                                                                                  | -CH <sub>3</sub>                                                                      | 3600                                                                                |      |
| SC81474<br>(527 g mol <sup>-1</sup> )                                             |   | -H                                                                                | -Br                      | 47,8                                                                              | SC48129<br>(569 g mol <sup>-1</sup> )                                              |  | -H                                                                                  |   | 2200                                                                                |      |
| SC81476<br>(584 g mol <sup>-1</sup> )                                             |  | -H                                                                                | -Br                      | 41,1                                                                              | SC48143<br>(569 g mol <sup>-1</sup> )                                              | -H                                                                                 |  |  | > 2560                                                                              |      |

## Simultaneous West- and East-side optimization

|                                       | R | R1 | R2 | R3 | IC <sub>50</sub><br>[nM] |                                       | R1               | R2 | IC <sub>50</sub><br>[nM] |
|---------------------------------------|---|----|----|----|--------------------------|---------------------------------------|------------------|----|--------------------------|
| SC81457<br>(614 g mol <sup>-1</sup> ) |   |    | -H |    | 149                      | SC48590<br>(403 g mol <sup>-1</sup> ) | -NH <sub>2</sub> |    | 1020                     |
| SC84129<br>(592 g mol <sup>-1</sup> ) |   |    | -H |    | 1460                     | SC50582<br>(549 g mol <sup>-1</sup> ) |                  |    | > 16 μM                  |
| SC84199<br>(578 g mol <sup>-1</sup> ) |   |    | -H |    | 1440                     | SC50603<br>(566 g mol <sup>-1</sup> ) |                  |    | 452                      |
| SC84302<br>(592 g mol <sup>-1</sup> ) |   |    | -H |    | 2170                     | SC50604<br>(565 g mol <sup>-1</sup> ) |                  |    | 901                      |
| SC84472<br>(578 g mol <sup>-1</sup> ) |   |    | -H |    | 2180                     | SC50633<br>(550 g mol <sup>-1</sup> ) |                  |    | 3820                     |
| SC84509<br>(629 g mol <sup>-1</sup> ) |   |    | -H |    | 1000                     | SC77227<br>(562 g mol <sup>-1</sup> ) |                  |    | 244                      |
| SC84952<br>(550 g mol <sup>-1</sup> ) |   |    | -H |    | 4100                     | SC80166<br>(576 g mol <sup>-1</sup> ) |                  |    | 14,6                     |
| SC84969<br>(564 g mol <sup>-1</sup> ) |   |    | -H |    | 2530                     | SC80502<br>(429 g mol <sup>-1</sup> ) | -NH <sub>2</sub> |    | 77,5                     |
| SC85036<br>(631 g mol <sup>-1</sup> ) |   |    | -H |    | 5280                     | SC85370<br>(579 g mol <sup>-1</sup> ) |                  |    | 2520                     |
| SC85955<br>(616 g mol <sup>-1</sup> ) |   |    | -H |    | 4870                     | SC85371<br>(592 g mol <sup>-1</sup> ) |                  |    | 2900                     |
| SC86099<br>(613 g mol <sup>-1</sup> ) |   |    |    | -H | 1370                     | SC86525<br>(473 g mol <sup>-1</sup> ) |                  |    | 2170                     |
| SC86100<br>(613 g mol <sup>-1</sup> ) |   |    | -H |    | 439                      | SC87510<br>(559 g mol <sup>-1</sup> ) |                  |    | 4600                     |
| SC86123<br>(627 g mol <sup>-1</sup> ) |   |    |    | -H | 820                      | SC87512<br>(572 g mol <sup>-1</sup> ) |                  |    | > 16 μM                  |
| SC86124<br>(627 g mol <sup>-1</sup> ) |   |    | -H |    | 448                      | SC87513<br>(601 g mol <sup>-1</sup> ) |                  |    | 9130                     |
| SC88165<br>(604 g mol <sup>-1</sup> ) |   |    | -H |    | 1560                     |                                       |                  |    |                          |
| SC88166<br>(640 g mol <sup>-1</sup> ) |   |    | -H |    | 1600                     |                                       |                  |    |                          |

## Others

|                                       | 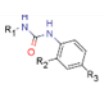 | R <sub>1</sub>                                                                    | R <sub>2</sub>                                                                    | R <sub>3</sub>                                                                    | IC <sub>50</sub><br>[nM] |
|---------------------------------------|-----------------------------------------------------------------------------------|-----------------------------------------------------------------------------------|-----------------------------------------------------------------------------------|-----------------------------------------------------------------------------------|--------------------------|
| SC08603<br>(300 g mol <sup>-1</sup> ) |  |  |  | -H                                                                                | > 16 μM                  |
| SC81373<br>(441 g mol <sup>-1</sup> ) |  |  | -H                                                                                |  | 256                      |
| SC82748<br>(448 g mol <sup>-1</sup> ) |  |  |  | -H                                                                                | 1150                     |
| SC88407<br>(439 g mol <sup>-1</sup> ) |  |  | -H                                                                                |  | > 16 μM                  |
| SC90612<br>(587 g mol <sup>-1</sup> ) |  |  | -H                                                                                |  | 6170                     |

## Fragments

| East-side fragments                   | IC <sub>50</sub><br>[nM]                                                                   |
|---------------------------------------|--------------------------------------------------------------------------------------------|
| SC09367<br>(186 g mol <sup>-1</sup> ) | 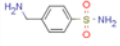 > 16 μM |
| SC12215<br>(341 g mol <sup>-1</sup> ) |  > 16 μM |
| SC41565<br>(157 g mol <sup>-1</sup> ) |  > 16 μM |
| SC83244<br>(383 g mol <sup>-1</sup> ) |  > 16 μM |
| SC83448<br>(171 g mol <sup>-1</sup> ) |  > 16 μM |
| SC86438<br>(400 g mol <sup>-1</sup> ) | > 16 μM                                                                                    |
| West-side fragment                    |                                                                                            |
| SC66414<br>(142 g mol <sup>-1</sup> ) |  > 16 μM |

**Supplementary Table 2: *In vitro* IC<sub>50</sub>, solubility in water, and permeability of various SC compounds**

| <b>Compound</b> | <b><i>In vitro</i> IC<sub>50</sub></b> | <b>Solubility in H<sub>2</sub>O</b> | <b>P<sub>app</sub></b>      |
|-----------------|----------------------------------------|-------------------------------------|-----------------------------|
|                 | <i>nM</i>                              | $\mu\text{g ml}^{-1}$               | $10^{-6} \text{ cm s}^{-1}$ |
| amicarbalide    | 10                                     | 100                                 | -                           |
| SC08165         | 134                                    | n.d.                                | 1.22                        |
| SC09064         | 10                                     | 316                                 | 0.28                        |
| SC43796         | 100                                    | n.d.                                | 0.13                        |
| SC48092         | 3600                                   | 320                                 | n.d.                        |
| SC48125         | 120                                    | 100                                 | 0.2                         |
| SC48443         | 63.9                                   | 100                                 | n.d.                        |
| SC77225         | 165                                    | n.d.                                | 0.38                        |
| SC81452         | 100                                    | 32                                  | n.d.                        |
| SC81458         | 8                                      | 890                                 | 0.76                        |
| SC82367         | 7                                      | >1000                               | 5.40                        |
| SC82486         | 38                                     | 100                                 | 2.50                        |
| SC82487         | 196                                    | >1000                               | n.d.                        |
| SC82687         | 995                                    | 32                                  | n.d.                        |
| SC82833         | 13                                     | 100                                 | n.d.                        |
| SC82869         | 89                                     | 320                                 | n.d.                        |
| SC83287         | 5000                                   | 10                                  | n.d.                        |
| SC83288         | 3                                      | 940                                 | 0.42                        |
| SC83289         | 1820                                   | 32                                  | 1.70                        |
| SC83290         | 40                                     | >1000                               | n.d.                        |
| SC85343         | 1550                                   | n.d.                                | 1.75                        |
| SC87507         | 139                                    | n.d.                                | 1.23                        |

n.d., not determined.

**Supplementary Table 3: IC<sub>50</sub> values of various *P. falciparum* strains**

| Strain | SC81458    | SC83288   | Chloroquine | Quinine   | Quinidine | Mefloquine | Pyrimethamine  | Amodiaquin | Artemisinin |
|--------|------------|-----------|-------------|-----------|-----------|------------|----------------|------------|-------------|
|        | <i>nM</i>  | <i>nM</i> | <i>nM</i>   | <i>nM</i> | <i>nM</i> | <i>nM</i>  | <i>nM</i>      | <i>nM</i>  | <i>nM</i>   |
| Dd2    | 8 ± 1      | 3 ± 1     | 135 ± 21    | 100 ± 1   | 15 ± 1    | 4 ± 0.1    | 22 000 ± 1 700 | 7 ± 1      | 2 ± 0.1     |
| D10    | 9 ± 4      | 5 ± 1     | 11 ± 3      | 58 ± 5    | 16 ± 1    | 1 ± 0.1    | 11 ± 2         | 7 ± 2      | 9 ± 0.4     |
| 3D7    | 13 ± 1     | 8 ± 2     | 3 ± 1       | 14 ± 2    | 14 ± 1    | 4 ± 0.1    | 16 ± 3         | 8 ± 1      | 8 ± 0.3     |
| FCR3   | 13 ± 8     | 6 ± 1     | 25 ± 4      | 182 ± 27  | 32 ± 6    | 4 ± 0.6    | 31 ± 8         | 8 ± 0.4    | 5 ± 1       |
| K1     | 9 ± 3      | 5 ± 1     | 70 ± 14     | 46 ± 4    | 12 ± 3    | 1 ± 0.2    | > 15 000       | 9 ± 1      | 3 ± 1       |
| Thai19 | 7 ± 1      | 4 ± 1     | 74 ± 17     | 62 ± 1    | 22 ± 5    | 1 ± 0.1    | > 15 000       | 9 ± 1      | 3 ± 1       |
| 7G8    | 18 ± 5     | 10 ± 1    | 30 ± 7      | 70 ± 17   | 16 ± 4    | 2 ± 0.1    | > 15 000       | 7 ± 2      | 1 ± 0.3     |
| NF54   | 0.4 ± 0.05 | 2 ± 1     | n.d.        | n.d.      | n.d.      | n.d.       | n.d.           | n.d.       | n.d.        |

The means ± of the standard error of the means of three independent determinations are shown.  
n.d., not determined.



**Supplementary Table 4: Kinome scan of SC81458**

| <b>Kinase target</b> | <b>Remaining enzyme activity (%)</b> | <b>Kinase target</b> | <b>Remaining enzyme activity (%)</b> | <b>Kinase target</b>      | <b>Remaining enzyme activity (%)</b> |
|----------------------|--------------------------------------|----------------------|--------------------------------------|---------------------------|--------------------------------------|
| AAK1                 | 100                                  | CAMK4                | 51                                   | EGFR(G719C)               | 80                                   |
| ABL1                 | 100                                  | CAMKK1               | 93                                   | EGFR(G719S)               | 100                                  |
| ABL1(E255K)          | 100                                  | CAMKK2               | 100                                  | EGFR(L747-E749del, A750P) | 86                                   |
| ABL1(F317I)          | 100                                  | CDC2L1               | 100                                  | EGFR(L747-E752del, P753S) | 84                                   |
| ABL1(F317L)          | 100                                  | CDC2L2               | 100                                  | EGFR(L747-T751del, Sins)  | 69                                   |
| ABL1(H396P)          | 100                                  | CDK11                | 91                                   | EGFR(L858R)               | 92                                   |
| ABL1(M351T)          | 100                                  | CDK2                 | 100                                  | EGFR(L858R, T790M)        | 100                                  |
| ABL1(Q252H)          | 95                                   | CDK3                 | 100                                  | EGFR(L861Q)               | 91                                   |
| ABL1(T315I)          | 100                                  | CDK5                 | 100                                  | EGFR(S752-I759del)        | 99                                   |
| ABL1(Y253F)          | 92                                   | CDK7                 | 100                                  | EPHA1                     | 91                                   |
| ABL2                 | 77                                   | CDK8                 | 100                                  | EPHA2                     | 99                                   |
| ACVR1                | 84                                   | CDK9                 | 100                                  | EPHA3                     | 100                                  |
| ACVR1b               | 100                                  | CDKL2                | 100                                  | EPHA4                     | 98                                   |
| ACVR2a               | 100                                  | CDKL3                | 98                                   | EPHA5                     | 100                                  |
| ACVR2b               | 93                                   | CDKL5                | 100                                  | EPHA6                     | 92                                   |
| ACVRL1               | 72                                   | CHEK1                | 98                                   | EPHA7                     | 81                                   |
| ADCK3                | 100                                  | CHEK2                | 100                                  | EPHA8                     | 83                                   |
| ADCK4                | 100                                  | CIT                  | 94                                   | EPHB1                     | 84                                   |
| AKT1                 | 87                                   | CLK1                 | 100                                  | EPHB2                     | 100                                  |
| AKT2                 | 84                                   | CLK2                 | 100                                  | EPHB3                     | 98                                   |
| AKT3                 | 66                                   | CLK3                 | 100                                  | EPHB4                     | 100                                  |
| ALK                  | 100                                  | CLK4                 | 92                                   | ERBB2                     | 100                                  |
| AMPK-alpha1          | 100                                  | CSF1R                | 82                                   | ERBB3                     | 81                                   |
| AMPK-alpha2          | 96                                   | CSK                  | 100                                  | ERBB4                     | 100                                  |
| ANKK1                | 99                                   | CSNK1a1l             | 100                                  | ERK1                      | 99                                   |
| ARK5                 | 92                                   | CSNK1d               | 100                                  | ERK2                      | 80                                   |
| ASK1                 | 100                                  | CSNK1e               | 100                                  | ERK3                      | 100                                  |
| ASK2                 | 100                                  | CSNK1g1              | 100                                  | ERK4                      | 100                                  |
| AURKA                | 68                                   | CSNK1g2              | 100                                  | ERK5                      | 100                                  |
| AURKB                | 78                                   | CSNK1g3              | 100                                  | ERK8                      | 100                                  |
| AURKC                | 73                                   | CSNK2a1              | 62                                   | ERN1                      | 100                                  |
| AXL                  | 100                                  | CSNK2a2              | 78                                   | FAK                       | 100                                  |
| BIKE                 | 85                                   | CTK                  | 100                                  | FER                       | 100                                  |
| BLK                  | 100                                  | DAPK1                | 100                                  | FES                       | 100                                  |
| BMPR1a               | 100                                  | DAPK2                | 100                                  | FGFR1                     | 100                                  |
| BMPR1b               | 85                                   | DAPK3                | 100                                  | FGFR2                     | 100                                  |
| BMPR2                | 100                                  | DCAMKL1              | 100                                  | FGFR3                     | 100                                  |
| BMX                  | 100                                  | DCAMKL2              | 100                                  | FGFR3(G697C)              | 100                                  |
| BRAF                 | 95                                   | DCAMKL3              | 62                                   | FGFR4                     | 100                                  |
| BRAF(V600E)          | 100                                  | DDR1                 | 91                                   | FGR                       | 100                                  |
| BRK                  | 100                                  | DDR2                 | 100                                  | FLT1                      | 91                                   |
| BRSK1                | 69                                   | DLK                  | 100                                  | FLT3                      | 100                                  |
| BRSK2                | 100                                  | DMPK                 | 76                                   | FLT3(D835H)               | 100                                  |
| BTK                  | 100                                  | DMPK2                | 100                                  | FLT3(D835Y)               | 89                                   |
| CAMK1                | 82                                   | DRAK1                | 98                                   | FLT3(ITD)                 | 85                                   |
| CAMK1d               | 91                                   | DRAK2                | 88                                   | FLT3(K663Q)               | 93                                   |
| CAMK1g               | 98                                   | DYRK1a               | 100                                  | FLT3(N841I)               | 100                                  |
| CAMK2a               | 100                                  | DYRK1b               | 87                                   | FLT4                      | 100                                  |
| CAMK2b               | 100                                  | DYRK2                | 100                                  | FRK                       | 100                                  |
| CAMK2d               | 90                                   | EGFR                 | 100                                  | FYN                       | 100                                  |
| CAMK2g               | 100                                  | EGFR(E46-A750del)    | 96                                   | GAK                       | 92                                   |

| Kinase target                | Remaining enzyme activity (%) | Kinase target | Remaining enzyme activity (%) | Kinase target  | Remaining enzyme activity (%) |
|------------------------------|-------------------------------|---------------|-------------------------------|----------------|-------------------------------|
| GCN2(kin.Dom.2, S808G)       | 100                           | MAP3K4        | 100                           | OSR1           | 100                           |
| GRK1                         | 100                           | MAP4K2        | 100                           | p38-alpha      | 88                            |
| GRK4                         | 92                            | MAP4K3        | 95                            | p38-beta       | 100                           |
| GRK7                         | 100                           | MAP4K4        | 100                           | p38-delta      | 89                            |
| GSK3a                        | 100                           | MAP4K5        | 100                           | p38-gamma      | 85                            |
| GSK3b                        | 100                           | MAPKAPK2      | 71                            | PAK1           | 100                           |
| HCK                          | 100                           | MAPKAPK5      | 91                            | PAK2           | 100                           |
| HIPK1                        | 100                           | MARK1         | 100                           | PAK3           | 93                            |
| HIPK2                        | 100                           | MARK2         | 100                           | PAK4           | 100                           |
| HIPK3                        | 99                            | MARK3         | 99                            | PAK6           | 95                            |
| HIPK4                        | 100                           | MARK4         | 100                           | PAK7           | 100                           |
| HPK1                         | 100                           | MAST1         | 46                            | PCTK1          | 92                            |
| HUNK                         | 100                           | MEK1          | 100                           | PCTK2          | 97                            |
| ICK                          | 73                            | MEK2          | 100                           | PCTK3          | 98                            |
| IGF1R                        | 77                            | MEK3          | 100                           | PDGFRa         | 87                            |
| IKK-alpha                    | 100                           | MEK4          | 100                           | PDGFRb         | 61                            |
| IKK-beta                     | 100                           | MEK6          | 81                            | PDPK1          | 74                            |
| IKK-epsilon                  | 100                           | MELK          | 100                           | PFTAIRE2       | 100                           |
| INSR                         | 100                           | MERTK         | 100                           | PFTK1          | 100                           |
| INSRR                        | 95                            | MET           | 78                            | PHKG1          | 80                            |
| IRAK1                        | 95                            | MET(M1250T)   | 100                           | PHKG2          | 100                           |
| IRAK3                        | 69                            | MET(Y1235D)   | 100                           | PIK3C2b        | 98                            |
| ITK                          | 86                            | MINK          | 95                            | PIK3C2g        | 100                           |
| JAK1(JH1domain-catalytic)    | 87                            | MKNK1         | 71                            | PIK3CA         | 83                            |
| JAK1(JH2domain-pseudokinase) | 89                            | MKNK2         | 100                           | PIK3CA(C420R)  | 100                           |
| JAK2(JH1domain-catalytic)    | 100                           | MLCK          | 100                           | PIK3CA(E542K)  | 100                           |
| JAK3(JH1domain-catalytic)    | 100                           | MLK1          | 64                            | PIK3CA(E545A)  | 100                           |
| JNK1                         | 98                            | MLK2          | 100                           | PIK3CA(E545K)  | 100                           |
| JNK2                         | 97                            | MLK3          | 100                           | PIK3CA(H1047L) | 100                           |
| JNK3                         | 100                           | MRCKA         | 100                           | PIK3CA(H1047Y) | 100                           |
| KIT                          | 60                            | MRCKB         | 99                            | PIK3CA(M1043I) | 100                           |
| KIT(D816V)                   | 100                           | MST1          | 100                           | PIK3CA(Q546K)  | 100                           |
| KIT(L576P)                   | 66                            | MST1R         | 91                            | PIK3Cb         | 70                            |
| KIT(V559D)                   | 100                           | MST2          | 100                           | PIK3Cd         | 73                            |
| KIT(V559D, T670I)            | 85                            | MST3          | 100                           | PIK3Cg         | 92                            |
| KIT(V559D, V654A)            | 100                           | MST4          | 100                           | PIK4Cb         | 100                           |
| LATS1                        | 82                            | MUSK          | 95                            | PIM1           | 100                           |
| LATS2                        | 100                           | MYLK          | 95                            | PIM2           | 87                            |
| LCK                          | 100                           | MYLK2         | 100                           | PIM3           | 100                           |
| LIMK1                        | 76                            | MYO3a         | 100                           | PIP5K1a        | 100                           |
| LIMK2                        | 100                           | MYO3b         | 100                           | PIP5K2b        | 84                            |
| LKB1                         | 88                            | NDR1          | 100                           | PKAC-apha      | 75                            |
| LOK                          | 100                           | NDR2          | 100                           | PKAC-beta      | 78                            |
| LTK                          | 100                           | NEK1          | 83                            | PKMYT1         | 90                            |
| LYN                          | 97                            | NEK2          | 96                            | PKN1           | 100                           |
| LZK                          | 100                           | NEK5          | 100                           | PKN2           | 67                            |
| MAK                          | 91                            | NEK6          | 100                           | PLK1           | 96                            |
| MAP3K1                       | 100                           | NEK7          | 95                            | PLK2           | 100                           |
| MAP3K15                      | 100                           | NEK9          | 100                           | PLK3           | 75                            |
| MAP3K2                       | 100                           | NIM1          | 100                           | PLK4           | 93                            |
| MAP3K3                       | 100                           | NLK           | 95                            | PRKCD          | 100                           |

| Kinase target             | Remaining enzyme activity (%) | Kinase target               | Remaining enzyme activity (%) |
|---------------------------|-------------------------------|-----------------------------|-------------------------------|
| PRKCE                     | 100                           | SRPK1                       | 100                           |
| PRKCH                     | 92                            | SRPK2                       | 93                            |
| PRKCQ                     | 100                           | SRPK3                       | 83                            |
| PRKD1                     | 65                            | STK16                       | 100                           |
| PRKD2                     | 97                            | STK33                       | 100                           |
| PRKD3                     | 100                           | STK35                       | 87                            |
| PRKG1                     | 86                            | STK36                       | 100                           |
| PRKG2                     | 80                            | STK39                       | 57                            |
| PRKR                      | 91                            | SYK                         | 100                           |
| PRKX                      | 72                            | TAK1                        | 100                           |
| PRP4                      | 100                           | TAO1                        | 100                           |
| PYK2                      | 98                            | TAOK1                       | 100                           |
| QSK                       | 100                           | TAOK3                       | 100                           |
| RAF1                      | 100                           | TBK1                        | 100                           |
| RET                       | 89                            | TEC                         | 90                            |
| RET(M918T)                | 100                           | TESK1                       | 100                           |
| RRET(V804L)               | 100                           | TGFBR1                      | 100                           |
| RET(V804M)                | 100                           | TGFBR2                      | 80                            |
| RIOK1                     | 75                            | TIE1                        | 99                            |
| RIOK2                     | 98                            | TIE2                        | 100                           |
| RIOK3                     | 77                            | TLK1                        | 100                           |
| RIPK1                     | 100                           | TLK2                        | 97                            |
| RIPK2                     | 96                            | TNIK                        | 100                           |
| RIPK4                     | 74                            | TNK1                        | 70                            |
| ROCK1                     | 100                           | TNK2                        | 94                            |
| ROCK2                     | 76                            | TNNI3K                      | 100                           |
| ROS1                      | 100                           | TRKa                        | 100                           |
| RPS6KA1(Kin.Dom.1-N-term) | 100                           | TRKb                        | 100                           |
| RPS6KA1(Kin.Dom.2-C-term) | 100                           | TRKc                        | 100                           |
| RPS6KA2(Kin.Dom.1-N-term) | 100                           | TSSK1B                      | 97                            |
| RPS6KA2(Kin.Dom.2-C-term) | 100                           | TTK                         | 91                            |
| RPS6KA3(Kin.Dom.1-N-term) | 100                           | TXK                         | 87                            |
| RPS6KA4(Kin.Dom.1-N-term) | 85                            | TYK2(JHdomain-catalytic)    | 76                            |
| RPS6KA4(Kin.Dom.2-C-term) | 92                            | TYK2(JHdomain-speudokinase) | 93                            |
| RPS6KA5(Kin.Dom.1-N-term) | 96                            | TYRO3                       | 79                            |
| RPS6KA5(Kin.Dom.2-C-term) | 100                           | ULK1                        | 100                           |
| RPS6KA6(Kin.Dom.1-N-term) | 68                            | ULK2                        | 100                           |
| RPS6KA6(Kin.Dom.2-C-term) | 100                           | ULK3                        | 73                            |
| SBK1                      | 72                            | VEGFR2                      | 84                            |
| SgK085                    | 100                           | WEE1                        | 100                           |
| SgK110                    | 100                           | WEE2                        | 100                           |
| SIK                       | 97                            | YANK2                       | 99                            |
| SIK2                      | 100                           | YANK3                       | 97                            |
| SLK                       | 100                           | YES                         | 97                            |
| SNARK                     | 100                           | YSK1                        | 76                            |
| SRC                       | 81                            | YSK4                        | 100                           |
| SRMS                      | 79                            | ZAK                         | 100                           |
|                           |                               | ZAP70                       | 89                            |

**Supplementary Table 5: Interaction of SC81458 and SC83288 with human transporters and receptors**

| Receptor/Transporter                         | Inhibition of control specific binding (%) |         | Control specific binding                                                    |                      |                    |
|----------------------------------------------|--------------------------------------------|---------|-----------------------------------------------------------------------------|----------------------|--------------------|
|                                              | SC81458                                    | SC83288 | compound                                                                    | IC <sub>50</sub> (M) | K <sub>i</sub> (M) |
| A <sub>1</sub> (h)                           | 7                                          | 8       | DPCPX                                                                       | 8.2E-09              | 5.2E-09            |
| A <sub>2A</sub> (h)                          | 5                                          | 13      | NECA                                                                        | 3.7E-08              | 3.0E-08            |
| A <sub>3</sub> (h)                           | 0                                          | 0       | IB-MECA                                                                     | 1.1E-09              | 6.4E-10            |
| a <sub>1</sub> (non-selective)               | 21                                         | 9       | prazosin                                                                    | 8.2E-10              | 2.2E-10            |
| a <sub>2</sub> (non-selective)               | 21                                         | 14      | yohimbine                                                                   | 6.9E-08              | 3.0E-08            |
| b <sub>1</sub> (h)                           | -2                                         | 7       | atenolol                                                                    | 2.8E-07              | 2.0E-07            |
| b <sub>2</sub> (h)                           | 6                                          | 27      | ICI 118551                                                                  | 1.2E-09              | 4.0E-10            |
| AT <sub>1</sub> (h)                          | 11                                         | 6       | saralasin                                                                   | 1.5E-09              | 7.6E-10            |
| BZD (central)                                | 16                                         | 70      | diazepam                                                                    | 9.8E-09              | 8.3E-09            |
| B <sub>2</sub> (h)                           | 7                                          | -4      | NPC 567                                                                     | 1.8E-08              | 1.1E-08            |
| CB <sub>1</sub> (h)                          | 21                                         | 1       | CP 55940                                                                    | 1.7E-09              | 1.5E-09            |
| CCK <sub>1</sub> (CCK <sub>A</sub> ) (h)     | 0                                          | -5      | CCK-8s                                                                      | 2.0E-10              | 1.5E-10            |
| D <sub>1</sub> (h)                           | 51                                         | 79      | SCH 23390                                                                   | 8.1E-10              | 3.2E-10            |
| D <sub>2S</sub> (h)                          | 15                                         | 1       | (+)butaclamol                                                               | 1.0E-08              | 3.5E-09            |
| ET <sub>A</sub> (h)                          | 1                                          | 0       | endothelin-1                                                                | 7.8E-11              | 3.9E-11            |
| GABA (non-selective)                         | 14                                         | 6       | GABA                                                                        | 1.6E-08              | 9.5E-09            |
| GAL <sub>2</sub> (h)                         | -15                                        | 4       | galanin                                                                     | 1.1E-09              | 1.1E-09            |
| CXCR2 (IL-8B) (h)                            | -8                                         | -1      | IL-8                                                                        | 6.3E-11              | 2.9E-11            |
| CCR1 (h)                                     | -13                                        | -2      | MIP-1a                                                                      | 6.0E-11              | 3.0E-11            |
| H <sub>1</sub> (h)                           | 6                                          | 8       | pyrilamine                                                                  | 4.8E-09              | 1.7E-09            |
| H <sub>2</sub> (h)                           | 26                                         | 0       | cimetidine                                                                  | 1.2E-07              | 1.2E-07            |
| MC <sub>4</sub> (h)                          | -10                                        | 4       | NDP-a-MSH                                                                   | 3.4E-10              | 3.1E-10            |
| MT <sub>1</sub> (ML <sub>1A</sub> ) (h)      | -5                                         | -16     | melatonin                                                                   | 1.6E-10              | 9.9E-11            |
| M <sub>1</sub> (h)                           | 36                                         | 75      | pirenzepine                                                                 | 2.9E-08              | 2.5E-08            |
| M <sub>2</sub> (h)                           | 45                                         | 68      | methoctramine                                                               | 4.8E-08              | 3.3E-08            |
| M <sub>3</sub> (h)                           | 48                                         | 55      | 4-DAMP                                                                      | 9.6E-10              | 6.8E-10            |
| NK <sub>2</sub> (h)                          | 51                                         | 20      | [Nleu <sup>10</sup> ]-NKA (4-10)                                            | 3.8E-09              | 2.1E-09            |
| NK <sub>3</sub> (h)                          | 6                                          | 5       | SB 222200                                                                   | 1.6E-08              | 8.9E-09            |
| Y <sub>1</sub> (h)                           | 0                                          | 0       | NPY                                                                         | 2.6E-10              | 1.8E-10            |
| Y <sub>2</sub> (h)                           | -20                                        | -4      | NPY                                                                         | 1.3E-10              | 5.2E-11            |
| NTS <sub>1</sub> (NT <sub>1</sub> ) (h)      | 1                                          | 1       | neurotensin                                                                 | 1.1E-09              | 8.6E-10            |
| d <sub>2</sub> (DOP) (h)                     | 10                                         | 1       | DPDPE                                                                       | 4.0E-09              | 2.4E-09            |
| k (KOP)                                      | 43                                         | 36      | U 50488                                                                     | 1.3E-09              | 8.9E-10            |
| m (MOP) (h)                                  | 24                                         | 25      | DAMGO                                                                       | 4.8E-10              | 2.0E-10            |
| NOP (ORL1) (h)                               | 2                                          | 10      | nociceptin                                                                  | 9.5E-10              | 2.1E-10            |
| TP (h) (TXA <sub>2</sub> /PGH <sub>2</sub> ) | -10                                        | -5      | U 44069                                                                     | 1.4E-08              | 6.2E-09            |
| 5-HT <sub>1A</sub> (h)                       | 2                                          | 15      | 8-OH-DPAT                                                                   | 6.7E-10              | 4.2E-10            |
| 5-HT <sub>1B</sub>                           | -3                                         | 6       | serotonin                                                                   | 9.5E-09              | 5.8E-09            |
| 5-HT <sub>2A</sub> (h)                       | 17                                         | 30      | ketanserin                                                                  | 3.3E-09              | 1.8E-09            |
| 5-HT <sub>2B</sub> (h)                       | 37                                         | 17      | (±)DOI                                                                      | 5.1E-09              | 4.6E-09            |
| 5-HT <sub>3</sub> (h)                        | 1                                          | 17      | MDL 72222                                                                   | 6.9E-09              | 4.8E-09            |
| 5-HT <sub>5a</sub> (h)                       | 1                                          | 16      | serotonin                                                                   | 4.2E-07              | 2.1E-07            |
| 5-HT <sub>6</sub> (h)                        | -2                                         | 11      | serotonin                                                                   | 1.5E-07              | 7.3E-08            |
| 5-HT <sub>7</sub> (h)                        | 19                                         | 4       | serotonin                                                                   | 5.4E-10              | 2.0E-10            |
| sst (non-selective)                          | -2                                         | 4       | somatostatin-14                                                             | 1.5E-10              | 9.2E-11            |
| VPAC <sub>1</sub> (VIP <sub>1</sub> ) (h)    | -4                                         | -5      | VIP                                                                         | 7.0E-11              | 3.9E-11            |
| V <sub>1a</sub> (h)                          | -1                                         | 11      | [d(CH <sub>2</sub> ) <sub>5</sub> <sup>1</sup> , Tyr(Me) <sub>2</sub> ]-AVP | 1.7E-09              | 1.0E-09            |
| Ca <sup>2+</sup> channel (L, verapamil site) | 17                                         | 14      | D 600                                                                       | 6.7E-08              | 3.4E-08            |
| K <sub>V</sub> channel                       | 0                                          | 2       | α-dendrotoxin                                                               | 1.5E-10              | 1.2E-10            |
| Na <sup>+</sup> channel (site 2)             | 45                                         | 19      | veratridine                                                                 | 1.0E-05              | 9.0E-06            |
| Cl <sup>-</sup> channel (GABA-gated)         | -28                                        | -37     | picrotoxinin                                                                | 1.2E-07              | 1.0E-07            |
| norepinephrine transporter (h)               | 73                                         | 59      | protriptyline                                                               | 5.5E-09              | 4.1E-09            |
| dopamine transporter (h)                     | 79                                         | 82      | BTCP                                                                        | 1.1E-08              | 6.0E-09            |
| 5-HT transporter (h)                         | 28                                         | 38      | imipramine                                                                  | 4.2E-09              | 1.9E-09            |

**Supplementary Table 6: Cytochromes P inhibitory potency of SC81458 and SC83288**

| Enzyme   | Substrate        | Metabolite                  | Remaining enzyme activity (%) |                      |
|----------|------------------|-----------------------------|-------------------------------|----------------------|
|          |                  |                             | SC81458 (10 $\mu$ M)          | SC83288 (10 $\mu$ M) |
| CYP1A2   | melatonin        | 6-OH-melatonin              | 95                            | 97                   |
| CYP2A6   | coumarin         | 7-OH-coumarin               | 98                            | 101                  |
| CYP2B6   | bupropion        | OH-bupropion                | 87                            | 95                   |
| CYP2C8   | amodiaquine      | Desethylamodiaquine         | 95                            | 89                   |
| CYP2C9   | tolbutamide      | OH-tolbutamide              | 104                           | 103                  |
| CYP2C19a | omeprazole       | 5-OH-omeprazole             | 87                            | 104                  |
| CYP2C19b | omeprazole       | desmethylomeprazole         | 89                            | 96                   |
| CYP2D6   | dextromethorphan | O-desmethyldextromethorphan | 107                           | 91                   |
| CYP2E1   | chlorzoxazone    | 6-OH-chlorzoxazone          | 106                           | 68                   |
| CYP3A4a  | midazolam        | 1'-OH-midazolam             | 74                            | 92                   |
| CYP3A4b  | testosterone     | 6 $\beta$ -OH-testosterone  | 77                            | 88                   |
| CYP3A4c  | omeprazole       | omeprazole sulphone         | 66                            | 87                   |
| CYP3A4d  | omeprazole       | 3-OH-omeprazole             | 98                            | 92                   |

**Supplementary Table 7: Clinical laboratory parameters in rats after treatment with SC83288**

|          |                      | <b>Clinical</b>     |             |               |                |                  |                |
|----------|----------------------|---------------------|-------------|---------------|----------------|------------------|----------------|
|          |                      | <b>Biochemistry</b> |             |               |                |                  |                |
|          |                      | Reference Range     |             | 24h           |                |                  |                |
|          |                      | Lower limit         | Upper limit | Placebo (n=3) | 15 mg/kg (n=3) | 22.5 mg/kg (n=2) | 30 mg/kg (n=3) |
| ALB      | g dl <sup>-1</sup>   | 3.8                 | 5.0         | 4.8           | 4.9            | 5.0              | 5.4            |
| ALB/GLOB | g dl <sup>-1</sup>   | 2.2                 | 6.3         | 8.2           | 5.5            | 6.7              | 8.9            |
| ALP      | U l <sup>-1</sup>    | 224                 | 627         | 470           | 306            | 399              | 424            |
| ALT      | U l <sup>-1</sup>    | 37                  | 79          | 57            | 51             | 58               | 58             |
| AMY      | U l <sup>-1</sup>    | 685                 | 1029        | 915           | 909            | 921              | 962            |
| AST      | U l <sup>-1</sup>    | 59                  | 115         | 72            | 70             | 79               | 85             |
| BUN      | mg dl <sup>-1</sup>  | 8.3                 | 18.8        | 14.3          | 14.7           | 17.5             | 15.7           |
| BUN/CREA | mg dl <sup>-1</sup>  | 20.0                | 90.8        | 64.4          | 66.7           | 72.5             | 78.3           |
| CA       | mg dl <sup>-1</sup>  | 10.4                | 11.6        | 11.0          | 11.0           | 11.0             | 11.2           |
| CK       | U l <sup>-1</sup>    | 71                  | 355         | 87            | 176            | 97               | 91             |
| CRE      | mg dl <sup>-1</sup>  | 0.2                 | 0.5         | 0.2           | 0.2            | 0.3              | 0.2            |
| GLOB     | g dl <sup>-1</sup>   | 0.8                 | 1.8         | 0.7           | 0.9            | 0.8              | 0.6            |
| GLU      | mg dl <sup>-1</sup>  | 151                 | 262         | 165           | 202            | 160              | 170            |
| K+       | mmol l <sup>-1</sup> | 4.8                 | 6.9         | 5.5           | 5.1            | 5.3              | 5.4            |
| NA/K     | mmol l <sup>-1</sup> | 19.6                | 28.5        | 24.7          | 26.7           | 25.7             | 25.2           |
| NA+      | mmol l <sup>-1</sup> | 132                 | 141         | 136           | 136            | 135              | 136            |
| PHOS     | mg dl <sup>-1</sup>  | 7.5                 | 10.7        | 9.0           | 9.4            | 9.2              | 9.0            |
| TBIL     | mg dl <sup>-1</sup>  | 0.1                 | 0.4         | 0.3           | 0.4            | 0.3              | 0.3            |
| TP       | g dl <sup>-1</sup>   | 5.2                 | 6.0         | 5.5           | 5.8            | 5.7              | 6.0            |

  

|      |                                  | <b>Heamatology</b> |             |               |                |                  |                |
|------|----------------------------------|--------------------|-------------|---------------|----------------|------------------|----------------|
|      |                                  | Reference Range    |             | 24h           |                |                  |                |
|      |                                  | Lower limit        | Upper limit | Placebo (n=3) | 15 mg/kg (n=3) | 22.5 mg/kg (n=2) | 30 mg/kg (n=3) |
| EOS  | %                                | 0.1                | 1.8         | 0.2           | 0.4            | 0.3              | 0.3            |
| GRA  | 10 <sup>3</sup> mm <sup>-3</sup> | 0.9                | 4.0         | 1.7           | 3.0            | 2.4              | 1.8            |
| GRA  | %                                | 9.9                | 26.8        | 13.3          | 17.7           | 16.2             | 15.5           |
| HCT  | %                                | 32.7               | 44.5        | 39.6          | 40.9           | 39.6             | 40.1           |
| HGB  | g dl <sup>-1</sup>               | 12.5               | 15.1        | 14.3          | 14.3           | 14.2             | 14.3           |
| LYM  | 10 <sup>3</sup> mm <sup>-3</sup> | 5.3                | 15.3        | 9.8           | 13.4           | 11.7             | 9.3            |
| LYM  | %                                | 71.4               | 89.1        | 85.4          | 80.7           | 82.1             | 83.0           |
| MCH  | pg                               | 19.0               | 24.5        | 20.9          | 20.5           | 21.0             | 20.5           |
| MCHC | g dl <sup>-1</sup>               | 31.6               | 41.1        | 36.0          | 35.1           | 35.9             | 35.8           |
| MCV  | μm <sup>3</sup>                  | 56                 | 64          | 58            | 58             | 59               | 57             |
| MON  | 10 <sup>3</sup> mm <sup>-3</sup> | 0.0                | 0.3         | 0.1           | 0.2            | 0.2              | 0.1            |
| MON  | %                                | 0.9                | 2.1         | 1.3           | 1.6            | 1.8              | 1.5            |
| MPV  | μm <sup>3</sup>                  | 5.5                | 7.2         | 5.7           | 5.7            | 5.9              | 5.7            |
| PLT  | 10 <sup>3</sup> mm <sup>-3</sup> | 381                | 1049        | 821           | 812            | 847              | 869            |
| RBC  | 10 <sup>3</sup> mm <sup>-3</sup> | 5.42               | 7.33        | 6.82          | 7.00           | 6.77             | 7.00           |
| RDW  | %                                | 11.5               | 14.2        | 13.3          | 13.3           | 13.3             | 13.4           |
| WBC  | 10 <sup>3</sup> mm <sup>-3</sup> | 6.4                | 19.8        | 11.6          | 16.7           | 14.3             | 11.2           |

**Supplementary Table 8: Activity of various SC compounds in mouse malaria model systems**

| Compound | <i>In vitro</i><br>IC <sub>50</sub> | Model<br>organism  | Dose                      | Administrative<br>route | Outcome                                               |
|----------|-------------------------------------|--------------------|---------------------------|-------------------------|-------------------------------------------------------|
|          | <i>nM</i>                           |                    | <i>mg kg<sup>-1</sup></i> |                         |                                                       |
| SC08165  | 450                                 | <i>P. berghei</i>  | 50                        | i.p. 1x4 days           | inactive                                              |
| SC09064  | 10                                  | <i>P. berghei</i>  | 50                        | i.p. 1x4 days           | inactive                                              |
| SC09064  | 10                                  | <i>P. berghei</i>  | 10                        | i.v. 1x4 days           | inactive                                              |
| SC09064  | 10                                  | <i>P. chabaudi</i> | 10                        | i.v. 1x4 days           | inactive                                              |
| SC09064  | 10                                  | <i>P. vinckei</i>  | 30                        | i.p. 1x4 days           | inactive                                              |
| SC09823  | 390                                 | <i>P. berghei</i>  | 50                        | i.p. 1x4 days           | inactive                                              |
| SC77215  | 68                                  | <i>P. vinckei</i>  | 20                        | i.p. 1x4 days           | 45% decrease of parasitemia                           |
| SC81458  | 8                                   | <i>P. berghei</i>  | 30                        | i.p. 1x4 days           | inactive                                              |
| SC81458  | 8                                   | <i>P. vinckei</i>  | 30                        | i.p. 1x4 days           | > 90% decrease of parasitemia, recrudescence          |
| SC82904  | 99                                  | <i>P. vinckei</i>  | 30                        | i.p. 1x4 days           | > 80 % decrease of parasitemia, no complete clearance |
| SC83288  | 3                                   | <i>P. berghei</i>  | 30                        | i.p. 1x4 days           | inactive                                              |
| SC83288  | 3                                   | <i>P. vinckei</i>  | 20                        | i.p. 1x4 days           | complete clearance, no recrudescence                  |
| SC83290  | 30                                  | <i>P. vinckei</i>  | 30                        | i.p. 1x4 days           | >90% decrease of parasitemia, no complete clearance   |

**Supplementary Table 9: Plasma protein binding of SC83288**

| Compound | Bound fraction (%) |          |          |            |
|----------|--------------------|----------|----------|------------|
|          | human              | rat      | mouse    | cynomolgus |
| SC83288  | 78 ± 1.3           | 80 ± 0.6 | 89 ± 2.2 | 82 ± 2.8   |

The means ± standard error of the means of three independent determinations are shown.



**Supplementary Table 10: Summary of sequencing data and variant calling**

| <b>Internal ID</b> | <b>Description</b> | <b>Sample ID</b> | <b>Read Accession number</b> | <b>Read Accession number</b> | <b>Reads (number)</b> | <b>Mapped reads (%)</b> | <b>Fold coverage</b> | <b>NP (number)</b> | <b>Indels (number)</b> |
|--------------------|--------------------|------------------|------------------------------|------------------------------|-----------------------|-------------------------|----------------------|--------------------|------------------------|
| PfPar              | Parent             | ERS445938        | ERR573917                    | ERR571272                    | 7,317,338             | 92.8                    | 46.3                 | 3,210              | 4,304                  |
| Pfcl4_1            |                    | ERS445939        | ERR573918                    | ERR571273                    | 8,050,856             | 93.2                    | 51.2                 | 4,829              | 4,799                  |
| Pfcl15             |                    | ERS445940        | ERR573919                    | ERR571274                    | 6,852,992             | 92.7                    | 43.3                 | 3,839              | 4,416                  |
| Pfcl21             |                    | ERS445941        | ERR573920                    | ERR571275                    | 7,494,362             | 91.8                    | 46.9                 | 3,816              | 4,397                  |
| Pfcl18             |                    | ERS445942        | ERR573921                    | ERR571276                    | 5,737,904             | 92.6                    | 36.2                 | 3,072              | 4,052                  |
| Pfcl13             |                    | ERS445943        | ERR573922                    | ERR571277                    | 6,506,440             | 92.4                    | 41.0                 | 3,492              | 4,240                  |
| Pfcl1              |                    | ERS445944        | ERR573923                    | ERR571278                    | 4,721,080             | 92.0                    | 29.6                 | 3,023              | 3,732                  |
| Pfcl9              |                    | ERS445945        | ERR573924                    | ERR571279                    | 6,134,674             | 92.3                    | 38.6                 | 3,218              | 4,167                  |
| Pfcl1b             |                    | ERS445946        | ERR573925                    | ERR571280                    | 6,833,770             | 93.0                    | 43.3                 | 3,552              | 4,443                  |

Each sample was run twice.

**Supplementary Table 11: IC<sub>50</sub> values of resistant strains to licensed drugs**

| <b>Drug</b>    | <b>Dd2 SC81458 resistant</b> | <b>Dd2 SC83288 resistant</b> | <b>Dd2</b>    |
|----------------|------------------------------|------------------------------|---------------|
|                | <i>nM</i>                    | <i>nM</i>                    | <i>nM</i>     |
| Chloroquine    | 150 ± 12                     | 120 ± 25                     | 135 ± 21      |
| Quinine        | 164 ± 10                     | 94 ± 9                       | 100 ± 10      |
| Quinidine      | 26 ± 1                       | 9 ± 0.4                      | 15 ± 1        |
| Mefloquine     | 18 ± 1                       | 6 ± 0.4                      | 4 ± 0.1       |
| Pyrimethamine  | 31 000 ± 2000                | 22 000 ± 2000                | 22 000 ± 2000 |
| Amodiaquine    | 8 ± 3                        | 5 ± 1                        | 7 ± 1         |
| Artemisininine | 4 ± 1                        | 1 ± 0.2                      | 2 ± 0.1       |
| Atovaquone     | 0.3 ± 0.1                    | 0.8 ± 0.1                    | 0.6 ± 0.1     |

The means ± of the standard error of the means of five independent determinations are shown.

## Supplementary Note 1

Analytical HPLC-MS determinations were performed using Waters 2700 Autosampler, Waters 1525 Multisolvant Delivery System and Micromass ZQ single quadrupole mass spectrometer with electrospray source. Column: Chromolith Fast Gradient C18 (Merck), 50 x 2 mm, with stainless steel 2  $\mu$ m prefilter. Eluent A, H<sub>2</sub>O + 0.1% HCOOH; eluent B, MeCN. The [M+H]<sup>+</sup> data is reported below. Preparative HPLC-MS were performed with a Waters 2700 Autosampler, Waters 600 Multisolvant Delivery System with preparative pump heads (500  $\mu$ L), Waters 600S Controller and Waters ZQ single quadrupole mass spectrometer with electrospray source. Column: Waters X-Terra RP18, 5  $\mu$ m, 19 x 150 mm. Eluent A, H<sub>2</sub>O + 0.1% HCOOH; eluent B, MeCN. Different linear gradients, individually adapted to sample. <sup>1</sup>H-NMR and <sup>13</sup>C-NMR were performed with a Bruker AV300 (300.13 Mhz) at temperature of 305 K. Abbreviations used for the peak identification were: s = singlet; d = doublet; t = triplet; q = quartet; m = multiplet; J = <sup>1</sup>H-<sup>1</sup>H coupling constant.

### Lead-optimization campaign – Synthesis of the “focussed-library”

All the compounds were obtained via solution synthesis methodologies. After work-up of the reactions, the compounds were purified by preparative HPLC/MS and characterized by LC/MS and in the case enough material was obtained, the corresponding compounds were further characterized by <sup>1</sup>H NMR. If the compounds were commercially available (Fisher Scientific, Acros Organics, Sigma-Aldrich, Maybridge Chemical), no characterization was performed.

The analytical analysis of the compounds listed in Supplementary Table 1 is provided below.

**SC09064:** [M+H]<sup>+</sup> calcd. for C<sub>21</sub>H<sub>22</sub>N<sub>6</sub>O<sub>5</sub>S<sub>2</sub>, 503.117; found for [M+H]<sup>+</sup>: 503.1. <sup>1</sup>H NMR (300 MHz, DMSO-d<sub>6</sub>)  $\delta$  = 4.04 (s, 2 H), 7.21-7.33 (bm, 1 H), 7.38 (d, J = 8.0 Hz, 1 H), 7.44 (d, J = 8.5 Hz, 2 H), 7.55 (t, J = 7.9 Hz, 1 H), 7.66-7.76 (m, 6 H), 7.98-7.99 (m, 1 H), 8.01-8.17 (bm, 1 H), 8.92-9.27 (bm, 3 H), 9.39 (s, 1 H), 9.50 (s, 1 H). <sup>13</sup>C NMR (75 MHz, DMSO-d<sub>6</sub>)  $\delta$  = 45.55, 117.13 (2x), 117.57, 121.28, 122.47, 125.56 (2x), 127.81 (4x), 129.40, 130.39, 132.88, 139.96, 142.02, 142.91, 143.43, 152.46, 165.68. **SC08165:** [M+H]<sup>+</sup> calcd. for C<sub>21</sub>H<sub>21</sub>N<sub>5</sub>O<sub>3</sub>S, 424.145; found for [M+H]<sup>+</sup>: 424.1. **SC09231:** [M+H]<sup>+</sup> calcd. for C<sub>21</sub>H<sub>18</sub>F<sub>3</sub>N<sub>5</sub>O<sub>3</sub>S, 478.116; found for [M+H]<sup>+</sup>: 478.1. <sup>1</sup>H NMR (DMSO-d<sub>6</sub>): 9.81-8.96 (m, 5H), 8.08 (t, J=5.7Hz, 1H), 7.97 (t, J=1.7Hz, 1H), 7.75-7.61 (m, 5H), 7.54 (t, J=8.0Hz, 1H), 7.46-7.35 (m, 2H), 7.05 (ddt, J<sub>HF</sub>=9.2Hz, J<sub>HH</sub>=9.2Hz, J<sub>HF</sub>=2.2Hz, J<sub>HF</sub>=3.8Hz, 1H), 4.03 (d, J=4.7Hz, 2H). **SC43796:** [M+H]<sup>+</sup> calcd. for C<sub>23</sub>H<sub>23</sub>N<sub>5</sub>O<sub>4</sub>S, 466.155; found for [M+H]<sup>+</sup>: 466.1. <sup>1</sup>H NMR (DMSO-d<sub>6</sub>): 10.40 (s, 1H), 10.21 (s, 1H), 7.99-7.92 (m, 1H), 7.85 (d, J = 8.8 Hz, 2H), 7.75 (d, J = 8.2 Hz, 1H), 7.67 (d, J = 8.8 Hz, 2H), 7.52 (t, J = 8.0 Hz, 1H), 7.39 (d, J = 7.9 Hz, 1H), 7.19-7.05 (m, 3H), 6.95 (d, J = 7.1 Hz, 1H), 5.01-4.94 (m, 1H), 4.57 (d, J = 4.7 Hz, 1H), 4.16-4.07 (m, 1H), 2.98-2.65 (m, 2H). (4H overlapped). **SC80166:** [M+H]<sup>+</sup> calcd. for C<sub>27</sub>H<sub>28</sub>F<sub>3</sub>N<sub>5</sub>O<sub>4</sub>S, 576.188; found for [M+H]<sup>+</sup>: 576.2. **SC81475:** [M+H]<sup>+</sup> calcd. for C<sub>28</sub>H<sub>32</sub>BrN<sub>5</sub>O<sub>3</sub>S, 599.148; found for [M+H]<sup>+</sup>:

599.1. **SC82341**:  $[M+H]^+$  calcd. for  $C_{29}H_{33}F_3N_6O_3S$ , 603.236; found for  $[M+H]^+$ : 603.2.  $^1H$  NMR (DMSO- $d_6$ ): 11.00 (broad, 1H, NH); 10.97 (broad, 1H, NH); 8.03 (broad, 1H, NH); 7.83 (m, 1H, Ar-H); 7.74-7.63 (m, 5H, Ar-H); 7.51-7.33 (m, 2H, Ar-H); 7.13-7.00 (m, 2H, Ar-H); 4.02 (broad, 2H, CH<sub>2</sub>); water signal partially covers a group signals; 2.33 (m, 2H, CH<sub>2</sub>); 1.46-1.23 (m, 4H, 2CH<sub>2</sub>); 0.88 (t, 3H,  $J=7.2$  Hz, CH<sub>3</sub>). **SC82343**:  $[M+H]^+$  calcd. for  $C_{29}H_{36}N_6O_3S$ , 549.263; found for  $[M+H]^+$ : 549.2.  $^1H$  NMR (DMSO- $d_6$ ): 11.28-11.14 (broad, 2H, 2NH); 8.52 (s broad, 1H, NH); 7.94-7.87 (broad, 1H, NH); 7.83 (m, 1H, Ar-H); 7.75-7.67 (m, 5H, Ar-H); 7.47 (m, 1H, Ar-H); 7.32-7.19 (m, 5H, Ar-H); 7.11-7.07 (m, 1H, Ar-H); 3.95 (s broad, 2H, CH<sub>2</sub>); water signal partially covers a group signals; 2.33 (m, 2H, CH<sub>2</sub>); 1.46-1.23 (m, 4H, 2CH<sub>2</sub>); 0.88 (t, 3H,  $J=7.2$  Hz, CH<sub>3</sub>). **SC82746**:  $[M+H]^+$  calcd. for  $C_{26}H_{36}N_6O_4S$ , 529.260; found for  $[M+H]^+$ : 529.2.  $^1H$  NMR (DMSO- $d_6$ ): 9.83-9.13 (broad, 3H, 3NH); 7.90 (broad, 1H, Ar-H); 7.80-7.56 (m, 6H, Ar-H); 7.28-7.22 (m, 1H, Ar-H); 3.67 (m, 4H, 2CH<sub>2</sub>); 2.89 (m, 4H, 2CH<sub>2</sub>); water signal partially covers a group signals; 1.60-1.42 (broad, 2H, CH<sub>2</sub>); 1.41-1.28 (m, 2H, CH<sub>2</sub>); 0.93 (t, 3H,  $J=7.2$  Hz, CH<sub>3</sub>). **SC82893**:  $[M+H]^+$  calcd. for  $C_{26}H_{38}N_6O_5S$ , 547.270; found for  $[M+H]^+$ : 547.2.  $^1H$  NMR (DMSO- $d_6$ ): 9.81 (broad, 2H, NH); 9.48 (broad, 1H, NH); 7.97 (broad, 1H, Ar-H); 7.79-7.57 (m, 6H, Ar-H); 7.29-7.24 (m, 1H, Ar-H); 3.55 (t, 4H,  $J=6.3$  Hz, 2CH<sub>2</sub>); 3.18 (t, 4H,  $J=6.3$  Hz, 2CH<sub>2</sub>); water signal partially covers a group signals; 1.68-1.56 (broad, 2H, CH<sub>2</sub>); 1.43-1.31 (m, 2H, CH<sub>2</sub>); 0.95 (t, 3H,  $J=7.3$  Hz, CH<sub>3</sub>). **SC82894**:  $[M+H]^+$  calcd. for  $C_{17}H_{21}N_5O_3S$ , 376.144; found for  $[M+H]^+$ : 376.1.  $^1H$  NMR (DMSO- $d_6$ ): 9.52-8.88 (m, 5H), 7.98 (t,  $J=1.7$ Hz, 1H), 7.73-7.64 (m, 5H), 7.54 (t,  $J=8.0$ Hz, 1H), 7.41-7.35 (m, 2H), 2.68 (dd,  $J=7.0$ Hz,  $J=13.0$ Hz, 2H), 1.43-1.31 (m, 2H), 0.79 (t,  $J=7.4$ Hz, 3H). **SC82895**:  $[M+H]^+$  calcd. for  $C_{25}H_{36}N_6O_3S$ , 501.264; found for  $[M+H]^+$ : 501.3.  $^1H$  NMR (DMSO- $d_6$ ): 9.77-9.27 (m broad, 3H, NH); 7.86 (broad, 1H, Ar-H); 7.66-7.46 (m, 6H, NH+Ar-H); 7.32 (m, 1H, Ar-H); 7.18-7.13 (m, 1H, Ar-H); water signal partially covers a group signals; 2.65-2.57 (m, 2H, CH<sub>2</sub>); 1.58-1.44 (broad, 2H, CH<sub>2</sub>); 1.36-1.20 (m, 4H, 2CH<sub>2</sub>); 0.84 (t, 3H,  $J=7.3$  Hz, CH<sub>3</sub>); 0.72 (t, 3H,  $J=7.4$  Hz, CH<sub>3</sub>). **SC85259**:  $[M+H]^+$  calcd. for  $C_{30}H_{39}N_7O_5S_2$ , 642.253; found for  $[M+H]^+$ : 642.2.  $^1HNMR$  (DMSO- $d_6$ ): 11.25 (s, 2H), 8.50 (s, 1H), 8.23-7.96 (m, 2H), 7.88-7.80 (m, 1H), 7.79-7.56 (m, 8H), 7.50 (t,  $J = 7.94$  Hz, 1H), 7.41 (d,  $J = 8.4$  Hz, 2H), 7.37-7.21 (m, 2H), 7.12 (d,  $J = 7.6$  Hz, 1H), 4.43-4.27 (m, 1H), under water peak (6H), 2.40-2.22 (m, 2H), 1.49-1.24 (m, 4H), 1.20 (d,  $J = 6.9$  Hz, 3H), 0.88 (t,  $J = 7.23, 7.23$  Hz, 3H).  $^{13}CNMR$  (75 MHz, DMSO- $d_6$ ): 13.81, 19.95, 23.14, 28.23, 43.68, 51.76 (2x), 52.28 (2x), 56.77, 117.01, 117.39 (2x), 120.73, 121.19, 152.52 (2x), 126.51 (2x), 127.50 (2x), 129.64, 129.81, 133.17, 141.13, 142.58, 143.97, 147.76, 152.97, 163.94, 167.01 (HCOO<sup>-</sup>). **SC85343**:  $[M+H]^+$  calcd. for  $C_{30}H_{38}N_6O_4S$ , 579.275; found for  $[M+H]^+$ : 579.3.  $^1H$  NMR (DMSO- $d_6$ ): 10.54 (bs, 2H), 8.45 (s, 1H), 7.89 (d,  $J=8.4$ Hz, 1H), 7.83-7.80 (m, 1H), 7.68 (d,  $J=8.7$ Hz, 1H), 7.58-7.48 (m, 5H), 7.23-7.10 (m, 5H), 4.77 (bs, 1H), 4.20 (dd,  $J=7.0$ Hz,  $J=13.6$ Hz, 1H), 3.63-3.16 (m, 11H) under water peak, 2.36-2.31 (m, 2H), 1.47-1.24 (m, 4H), 0.88 (t,  $J=7.2$ Hz, 3H). **SC86048**:  $[M+H]^+$  calcd. for  $C_{30}H_{37}N_7O_5S_2$ , 640.237; found for  $[M+H]^+$ : 640.2.  $^1H$  NMR (DMSO- $d_6$ ):

11.37-11.17 (broad, 2H, 2NH), 7.81-7.87 (m, 7H, Ar-H); 7.50-7.41 (m, 2H, Ar-H); 7.28 (broad, 2H, NH<sub>2</sub>); 7.12-7.09 (m, 1H, Ar-H); 4.64-4.59 (m, 4H, 2CH<sub>2</sub>); water signal partially covers a group signals; 2.33 (m, 2H, CH<sub>2</sub>); 1.45-1.22 (m, 4H, 2CH<sub>2</sub>); 0.88 (t, 3H, J=7.2 Hz, CH<sub>3</sub>).

**SC86610:** [M+H]<sup>+</sup> calcd. for C<sub>30</sub>H<sub>36</sub>F<sub>2</sub>N<sub>6</sub>O<sub>5</sub>S<sub>2</sub>, 664.302; found for [M+H]<sup>+</sup>: 664.2. <sup>1</sup>H NMR (DMSO-*d*<sub>6</sub>): 11.43 (bs, 2H), 8.43 (s, 1H), 8.12-7.98 (bm, 1H), 7.88-7.83 (m, 1H), 7.78-7.65 (m, 6H), 7.50 (t, J=7.9Hz, 1H), 7.19-7.10 (m, 2H), 4.02 (bs, 2H), 3.76-3.30 (m, 8H) under water peak, 2.36-2.25 (m, 2H), 1.45-1.24 (m, 4H), 0.91-0.85 (m, 3H).

**SC86714:** [M+H]<sup>+</sup> calcd. for C<sub>29</sub>H<sub>36</sub>FN<sub>7</sub>O<sub>5</sub>S<sub>2</sub>, 646.223; found for [M+H]<sup>+</sup>: 646.2. <sup>1</sup>H NMR (DMSO-*d*<sub>6</sub>): 10.55-10.46 (m, 2H), 8.32-8.31 (m, 1H), 8.16-8.09 (m, 1H), 7.93 (dd, J=2.3Hz, J=7.0Hz, 1H), 7.82 (bs, 1H), 7.79-7.65 (m, 6H), 7.52 (t, J=7.9Hz, 1H), 7.45-7.30 (m, 3H), 7.16 (d, J=7.5Hz, 1H), 4.03-4.02 (m, 2H), 3.68-3.11 (m, 8H) under water peak, 2.36-2.32 (m, 2H), 1.47-1.23 (m, 4H), 0.88 (t, J=7.2Hz, 3H).

**SC87211:** [M+H]<sup>+</sup> calcd. for C<sub>27</sub>H<sub>35</sub>N<sub>7</sub>O<sub>5</sub>S<sub>3</sub>, 634.194; found for [M+H]<sup>+</sup>: 634.1. <sup>1</sup>H NMR (DMSO-*d*<sub>6</sub>): 11.22 (s, 1H, 1NH); 11.17 (s broad, 1H, 1NH); 8.23 (broad, 1H, NH); 7.84 (m broad, 1H, Ar-H); 7.76-7.47 (m, 8H, NH<sub>2</sub>+6 Ar-H); 7.33 (d, 1H, J=3.7 Hz, CH); 7.14-7.10 (m, 1H, Ar-H); 6.91 (d, 1H, J=3.7 Hz, CH); 4.17 (broad, 2H, CH<sub>2</sub>); 3.55 (broad, 4H, 2CH<sub>2</sub>); DMSO signal covers a group of signals; 2.34 (t, 2H, J=7.2 Hz, CH<sub>2</sub>); 1.46-1.23 (m, 4H, 2CH<sub>2</sub>); 0.88 (t, 3H, J=7.2 Hz, CH<sub>3</sub>).

**SC86354:** [M+H]<sup>+</sup> calcd. for C<sub>31</sub>H<sub>35</sub>N<sub>7</sub>O<sub>3</sub>S<sub>2</sub>, 618.232; found for [M+H]<sup>+</sup>: 618.2. <sup>1</sup>H NMR (DMSO-*d*<sub>6</sub>): 9.77-9.36 (m, 4H), 8.29 (s, 1H), 8.23 (d, J=8.6Hz, 2H), 8.03-7.89 (m, 4H), 7.71-7.53 (m, 4H), 7.39 (bs, 2H), 7.22 (d, J=7.5Hz, 1H), 3.66-3.17 (m, 10H) under water peak, 1.63-1.50 (bm, 2H), 1.33 (dd, J=7.4Hz, J=14.7Hz, 2H), 0.91 (t, J=7.2Hz, 3H).

**SC86943:** [M+H]<sup>+</sup> calcd. for C<sub>29</sub>H<sub>33</sub>N<sub>7</sub>O<sub>3</sub>S<sub>2</sub>, 592.216; found for [M+H]<sup>+</sup>: 592.2. <sup>1</sup>H NMR (DMSO-*d*<sub>6</sub>): 8.28 (bs, 1H), 8.25 (d, J=1.6Hz, 1H), 7.95 (bs, 1H), 7.74 (dd, J=1.8Hz, J=8.4Hz, 2H), 7.63 (d, J=8.0Hz, 1H), 7.51 (t, J=7.9Hz, 1H), 7.21 (bs, 2H), 7.14 (d, J=7.5Hz, 1H), 3.69-3.19 (m, 8H) under water peak, 2.38-2.31 (m, 2H), 1.48-1.22 (m, 4H), 0.88 (t, J=7.2Hz, 3H).

**SC81458:** [M+H]<sup>+</sup> calcd. for C<sub>29</sub>H<sub>37</sub>N<sub>7</sub>O<sub>5</sub>S<sub>2</sub>, 628.237; found for [M+H]<sup>+</sup>: 628.1. <sup>1</sup>H NMR (300 MHz, DMSO-*d*<sub>6</sub>): 11.19-11.29 (m, 2 H), 8.53 (s, 1 H), 7.99-8.12 (m, 1 H), 7.83-7.86 (m, 1 H), 7.69-7.76 (m, 8 H), 7.50 (t, J = 7.9 Hz, 1 H), 7.44 (d, J = 8.3 Hz, 2 H), 7.27-7.36 (m, 2 H), 7.13 (d, J = 7.6 Hz, 1 H), 4.03 (bs, 2 H), 3.52-3.60 (bm, 4 H), 2.50 (m, 4 H under DMSO peak), 2.32-2.36 (m, 2 H), 1.35-1.46 (m, 2 H), 1.24-1.33 (m, 2 H), 0.88 (t, J = 7.2 Hz, 3 H). <sup>13</sup>C NMR (75 MHz, DMSO-*d*<sub>6</sub>): 13.81, 19.95, 28.23, 45.56 (3x), 51.76 (2x), 56.78, 116.99, 117.57 (2x), 120.75, 121.18, 125.55 (2x), 127.66 (2x), 127.81 (2x), 129.64, 129.85, 132.42, 141.09, 142.02, 142.91, 144.17, 152.94, 163.94, 167.24 (HCOO<sup>-</sup>).

**SC82342:** [M+H]<sup>+</sup> calcd. for C<sub>29</sub>H<sub>37</sub>N<sub>7</sub>O<sub>5</sub>S<sub>2</sub>, 628.307; found for [M+H]<sup>+</sup>: 628.1.

**SC82365:** [M+H]<sup>+</sup> calcd. for C<sub>27</sub>H<sub>33</sub>N<sub>7</sub>O<sub>5</sub>S<sub>2</sub>, 600.201; found for [M+H]<sup>+</sup>: 600.1. <sup>1</sup>H NMR (DMSO-*d*<sub>6</sub>): 10.57-10.31 (m, 1H), 10.12 (bs, 1H), 8.30-8.09 (m, 1H), 7.91-7.49 (m, 11H), 7.43 (d, J = 8.14 Hz, 2H), 7.32 (s, 2H), 4.01 (d, J = 6.07 Hz, 2H), under water peak (10), 1.16 (dd, J = 6.07 Hz, 3H).

**SC82367:** [M+H]<sup>+</sup> calcd. for C<sub>28</sub>H<sub>35</sub>N<sub>7</sub>O<sub>5</sub>S<sub>2</sub>, 614.222; found for [M+H]<sup>+</sup>: 614.1. <sup>1</sup>H NMR (DMSO-*d*<sub>6</sub>): 9.80 (s broad, 1H, NH); 9.75 (s broad, 1H, NH); 9.70 (s broad,

1H, NH); 9.45 (s broad, 1H, NH); 8.08 (t, 1H,  $J=6.3$  Hz, NH); 7.93 (m, 1H, Ar-H); 7.76-7.62 (m, 7H, Ar-H); 7.56 (m, 1H, Ar-H); 7.45-7.41 (m, 2H, Ar-H); 7.28 (s broad, 2H,  $\text{NH}_2$ ); 7.25-7.21 (m, 1H, Ar-H); 4.04 (d, 2H,  $J=6.3$  Hz,  $\text{CH}_2$ ); water signal partially covers a group signals; 1.70-1.58 (m broad, 2H,  $\text{CH}_2$ ); 0.92 (t, 3H,  $J=7.4$  Hz,  $\text{CH}_3$ ). **SC82486**:  $[\text{M}+\text{H}]^+$  calcd. for  $\text{C}_{28}\text{H}_{35}\text{N}_7\text{O}_5\text{S}_2$ , 614.222; found for  $[\text{M}+\text{H}]^+$ : 614.2.  $^1\text{H}$  NMR ( $\text{DMSO}-d_6$ ): 10.14 (s 1H), 10.07 (s, 1H), 9.49 (bs, 1H), 8.17 (bs, 1H), 8.08 (t,  $J=6.3\text{Hz}$ , 1H), 7.78-7.72 (m, 5H), 7.70-7.64 (m, 3H), 7.53 (t,  $J=7.9\text{Hz}$ , 1H), 7.44 (d,  $J=8.4\text{Hz}$ , 2H), 7.29 (bs, 1H), 7.18 (d,  $J=7.7\text{Hz}$ , 1H), 4.03 (d,  $J=6.2\text{Hz}$ , 2H), 3.51-3.12 (m, 4H), 2.78-2.57 (m, 5H), 0.99 (d,  $J=6.5\text{Hz}$ , 6H). **SC82487**:  $[\text{M}+\text{H}]^+$  calcd. for  $\text{C}_{32}\text{H}_{43}\text{N}_7\text{O}_5\text{S}_2$ , 670.284; found for  $[\text{M}+\text{H}]^+$ : 670.1  $^1\text{H}$  NMR ( $\text{DMSO}-d_6$ ): 11.58-11.40 (m, 2H), 8.50 (s, 1H), 7.89-7.82 (m, 1H), 7.80-7.66 (m, 9H), 7.53-7.39 (m, 3H), 7.36-7.25 (m, 1H), 7.11 (d,  $J = 7.7$  Hz, 1H), 4.02 (bs, 2H), under water peak (6H), 2.40-2.19 (m, 4H), 1.50-1.35 (m, 2H), 1.33-1.18 (m, 8H), 0.86 (t,  $J = 6.7$  Hz, 3H). **SC82508**:  $[\text{M}+\text{H}]^+$  calcd. for  $\text{C}_{28}\text{H}_{33}\text{N}_7\text{O}_5\text{S}_2$ , 612.206; found for  $[\text{M}+\text{H}]^+$ : 612.1. **SC82682**:  $[\text{M}+\text{H}]^+$  calcd. for  $\text{C}_{26}\text{H}_{31}\text{N}_7\text{O}_5\text{S}_2$ , 586.190; found for  $[\text{M}+\text{H}]^+$ : 586.1.  $^1\text{H}$  NMR ( $\text{DMSO}-d_6$ ): 9.79 (s broad, 1H, NH); 9.66 (s broad, 1H, NH); 9.61 (broad, 1H, NH); 9.44 (s broad, 1H, NH); 8.09 (t, 1H,  $J=6.3$  Hz, NH); 7.93 (m, 1H, Ar-H); 7.76-7.54 (m, 8H, Ar-H); 7.45-7.41 (m, 2H, Ar-H); 7.29 (s broad, 2H,  $\text{NH}_2$ ); 7.24-7.21 (m, 1H, Ar-H); 4.04 (d, 2H,  $J=6.2$  Hz,  $\text{CH}_2$ ); water signal partially covers a group of signals. **SC82833**:  $[\text{M}+\text{H}]^+$  calcd. for  $\text{C}_{30}\text{H}_{39}\text{N}_7\text{O}_5\text{S}_2$ , 642.253; found for  $[\text{M}+\text{H}]^+$ : 642.1.  $^1\text{H}$  NMR ( $\text{DMSO}-d_6$ ): 9.75 (very broad, 1H, NH); 9.54 (broad, 1H, NH); 9.50 (broad, 1H, NH); 9.40 (very broad, 1H, NH); 8.08 (t, 1H,  $J=6.3$  Hz, NH); 7.92 (broad, 1H, Ar-H); 7.76-7.53 (m, 8H, Ar-H); 7.44-7.40 (m, 2H, Ar-H); 7.27 (broad, 2H,  $\text{NH}_2$ ); 7.25-7.20 (m, 1H, Ar-H); 4.03 (d, 2H,  $J=6.3$  Hz,  $\text{CH}_2$ ); water signal partially covers a group signals; 1.65-1.53 (broad, 2H,  $\text{CH}_2$ ); 1.35-1.24 (m, 4H, 2 $\text{CH}_2$ ); 0.88 (t, 3H,  $J=6.8$  Hz,  $\text{CH}_3$ ). **SC82904**:  $[\text{M}+\text{H}]^+$  calcd. for  $\text{C}_{25}\text{H}_{29}\text{N}_7\text{O}_5\text{S}_2$ , 572.175; found for  $[\text{M}+\text{H}]^+$ : 572.1.  $^1\text{H}$  NMR ( $\text{DMSO}-d_6$ ): 9.83-9.41 (very broad, 4H, 4NH); 8.09 (t, 1H,  $J=6.4$  Hz, NH); 7.93 (broad, 1H, Ar-H); 7.76-7.53 (m, 8H, Ar-H); 7.45-7.41 (m, 2H, Ar-H); 7.29 (s broad, 2H,  $\text{NH}_2$ ); 7.27-7.23 (m, 1H, Ar-H); 4.04 (d, 2H,  $J=6.3$  Hz,  $\text{CH}_2$ ); 3.95 (m broad, 2H,  $\text{CH}_2$ ); 3.58 (m broad, 2H,  $\text{CH}_2$ ); water signal partially covers a group of signals. **SC86669**:  $[\text{M}+\text{H}]^+$  calcd. for  $\text{C}_{29}\text{H}_{35}\text{N}_7\text{O}_6\text{S}_2$ , 642.217; found for  $[\text{M}+\text{H}]^+$ : 642.1.  $^1\text{H}$  NMR ( $\text{DMSO}-d_6$ ): 10.59 (very broad, 2H, 2NH); 8.06 (t broad, 1H, NH); 7.85-7.82 (m broad, 1H, Ar-H); 7.77-7.66 (m, 7H, Ar-H); 7.54-7.41 (m, 3H, Ar-H); 7.29 (s broad, 2H,  $\text{NH}_2$ ); 7.18-7.13 (m, 1H, Ar-H); 4.16 (broad, 1H, CO- $\text{CH}_2$ -N); 4.03 (d broad, 2H,  $\text{CH}_2$ ); 3.68-3.44 (broad, 4H, 2 $\text{CH}_2$ ); 3.35 (t, 2H;  $J=7.2$  Hz,  $\text{CH}_2$ ); water signal covers a group of signals; 1.54-1.21 (m, 4H, 2 $\text{CH}_2$ ); 0.90 (t, 3H;  $J=7.3$  Hz,  $\text{CH}_3$ ). **SC87409**:  $[\text{M}+\text{H}]^+$  calcd. for  $\text{C}_{29}\text{H}_{38}\text{N}_8\text{O}_5\text{S}_2$ , 643.248; found for  $[\text{M}+\text{H}]^+$ : 643.2.  $^1\text{H}$  NMR ( $\text{DMSO}-d_6$ ): 10.16 (m, 1H), 10.03 (m, 1H), 9.80 (bs, 1H), 9.47 (bs, 1H), 9.10 (bs, 1H), 8.13-8.04 (m, 1H), 7.93-7.87 (m, 1H), 7.79-7.71 (m, 5H), 7.66 (d,  $J=8.9\text{Hz}$ , 2H), 7.53 (t,  $J=8.0\text{Hz}$ , 1H), 7.44 (d,  $J=8.3\text{Hz}$ , 2H), 7.35-7.27 (m, 3H), 4.03 (d,  $J=6.3\text{Hz}$ , 2H), 3.48-3.16 (m, 12H) under water peak, 1.76-1.55 (m, 4H). **SC87507**:  $[\text{M}+\text{H}]^+$  calcd. for  $\text{C}_{25}\text{H}_{28}\text{N}_6\text{O}_6\text{S}_2$ , 573.159; found for  $[\text{M}+\text{H}]^+$ : 573.1.  $^1\text{H}$  NMR

(DMSO- $d_6$ ): 9.81 (s broad, 1H, NH); 9.74 (s broad, 1H, NH); 9.37 (broad, 1H, NH); 8.07 (t, 1H,  $J=6.2$  Hz, NH); 7.85 (m, 1H, Ar-H); 7.76-7.62 (m, 7H, Ar-H); 7.55-7.42 (m, 3H, Ar-H); 7.28 (s broad, 2H,  $\text{NH}_2$ ); 7.28-7.18 (m, 3H,  $\text{NH}_2$ +Ar-H); 4.03 (d, 2H,  $J=6.0$  Hz,  $\text{CH}_2$ ); 3.74-3.72 (m broad, 4H,  $2\text{CH}_2$ ); 3.54-3.58 (m broad, 4H,  $2\text{CH}_2$ ).  $^{13}\text{C}$  NMR (75 MHz, DMSO- $d_6$ ): 45.44, 65.01 (2 $\times$ ), 117.29, 117.63 (2 $\times$ ), 121.28, 121.36, 125.44 (2 $\times$ ), 127.64 (2 $\times$ ), 127.68 (2 $\times$ ), 129.54, 129.64, 132.79, 140.33, 141.87, 142.79, 143.43, 152.34, 164.10. **SC87508**:  $[\text{M}+\text{H}]^+$  calcd. for  $\text{C}_{27}\text{H}_{34}\text{N}_8\text{O}_5\text{S}_2$ , 615.217; found for  $[\text{M}+\text{H}]^+$ : 615.2.  $^1\text{H}$  NMR (DMSO- $d_6$ ): 11.63-11.44 (m, 2H), 8.41 (bs, 1H), 8.05-7.98 (m, 1H), 7.84 (d,  $J=8.3$ Hz, 1H), 7.79-7.66 (m, 5H), 7.50 (t,  $J=8.0$ Hz, 1H), 7.43 (d,  $J=8.4$ Hz, 2H), 7.25 (d,  $J=7.9$ Hz, 1H), 4.03 (bs, 2H), 3.59-3.47 (m, 2H), 3.00-2.80 (m, 4H), 2.68-2.39 (m, 6H). **SC87860**:  $[\text{M}+\text{H}]^+$  calcd. for  $\text{C}_{23}\text{H}_{26}\text{N}_6\text{O}_5\text{S}_2$ , 531.148; found for  $[\text{M}+\text{H}]^+$ : 531.1.  $^1\text{H}$  NMR (DMSO- $d_6$ ): 10.90 (s broad, 1H, 1NH); 10.85 (s broad, 1H, 1NH); 10.85 (s broad, 1H, 1NH); 9.14 (broad, 1H, NH); 8.05 (t broad, 1H, NH); 7.83 (m broad, 1H, Ar-H); 7.76-7.68 (m, 7H, Ar-H); 7.54-7.41 (m, 3H, Ar-H); 7.30 (s broad, 2H,  $\text{NH}_2$ ); 7.16-7.11 (m, 1H, Ar-H); 4.03 (broad, 2H,  $\text{CH}_2$ ); 3.11 (s broad, 6H,  $2\text{CH}_3$ ). **SC87866**:  $[\text{M}+\text{H}]^+$  calcd. for  $\text{C}_{28}\text{H}_{32}\text{N}_8\text{O}_5\text{S}_2$ , 625.201; found for  $[\text{M}+\text{H}]^+$ : 625.1.  $^1\text{H}$  NMR (DMSO- $d_6$ ): 11.40 (bm, 2H), 8.54 (bs, 1H), 8.03 (m, 1H), 7.85 (m, 1H), 7.79-7.65 (m, 6H), 7.51-7.38 (m, 3H), 7.30 (bs, 2H), 7.11 (d,  $J=7.4$ Hz, 1H), 4.02 (bm, 2H), 3.61-3.40 (m, 4H), 2.72-2.60 (m, 8H). **SC87867**:  $[\text{M}+\text{H}]^+$  calcd. for  $\text{C}_{29}\text{H}_{35}\text{N}_7\text{O}_5\text{S}_2$ , 625.222; found for  $[\text{M}+\text{H}]^+$ : 625.1.  $^1\text{H}$  NMR (DMSO- $d_6$ ): 11.52 (s, 1H, 1NH); 11.50 (s broad, 1H, 1NH); 8.03 (t broad, 1H, NH); 7.86 (m broad, 1H, Ar-H); 7.79-7.67 (m, 7H, Ar-H); 7.52-7.41 (m, 3H, Ar-H); 7.30 (s broad, 2H,  $\text{NH}_2$ ); 7.14-7.09 (m, 1H, Ar-H); 4.03 (broad, 2H,  $\text{CH}_2$ ); 3.57 (broad, 4H,  $2\text{CH}_2$ ); 2.60 (broad, 4H,  $2\text{CH}_2$ ); 2.26 (d, 2H,  $J=6.6$  Hz,  $\text{CH}_2$ ); 0.84 (m, 1H, CH); 0.47 (m, 2H,  $\text{CH}_2$ ); 0.09 (m, 2H,  $\text{CH}_2$ ). **SC87868**:  $[\text{M}+\text{H}]^+$  calcd. for  $\text{C}_{29}\text{H}_{35}\text{N}_7\text{O}_7\text{S}_2$ , 658.211; found for  $[\text{M}+\text{H}]^+$ : 658.1.  $^1\text{H}$  NMR (DMSO- $d_6$ ): 11.53 (s, 1H, 1NH); 11.49 (s broad, 1H, 1NH); 8.02 (t broad, 1H, NH); 7.83 (m broad, 1H, Ar-H); 7.78-7.67 (m, 7H, Ar-H); 7.50-7.40 (m, 3H, Ar-H); 7.30 (s broad, 2H,  $\text{NH}_2$ ); 7.11-7.06 (m, 1H, Ar-H); 4.93 (t, 1H,  $J=4.4$  Hz, CH); 4.02 (broad, 2H,  $\text{CH}_2$ ); 3.90-3.74 (m, 4H,  $2\text{CH}_2$ ); 3.51 (broad, 4H,  $2\text{CH}_2$ ); 2.65 (broad, 4H,  $2\text{CH}_2$ ); 2.57 (d, 2H,  $J=4.4$  Hz,  $\text{CH}_2$ ). **SC87869**:  $[\text{M}+\text{H}]^+$  calcd. for  $\text{C}_{30}\text{H}_{37}\text{N}_7\text{O}_6\text{S}_2$ , 656.232; found for  $[\text{M}+\text{H}]^+$ : 656.1.  $^1\text{H}$  NMR (DMSO- $d_6$ ): 11.38 (s, 1H, 1NH); 11.35 (s broad, 1H, 1NH); 8.03 (t broad, 1H, NH); 7.85 (m broad, 1H, Ar-H); 7.77-7.67 (m, 7H, Ar-H); 7.52-7.41 (m, 3H, Ar-H); 7.30 (s broad, 2H,  $\text{NH}_2$ ); 7.13-7.09 (m, 1H, Ar-H); 4.02 (broad, 2H,  $\text{CH}_2$ ); 3.98-3.90 (m, 1H, CH); 3.77-3.50 (group of signals, 6H,  $\text{OCH}_2+2\text{pipCH}_2$ ); DMSO signal covers a group of signals; 1.98-1.41 (group of multiplets, 4H,  $2\text{CH}_2$ ). **SC87870**:  $[\text{M}+\text{H}]^+$  calcd. for  $\text{C}_{28}\text{H}_{35}\text{N}_7\text{O}_6\text{S}_2$ , 630.217; found for  $[\text{M}+\text{H}]^+$ : 630.1.  $^1\text{H}$  NMR (DMSO- $d_6$ ): 11.43 (s, 1H, 1NH); 11.40 (s broad, 1H, 1NH); 8.03 (t broad, 1H, NH); 7.85 (m broad, 1H, Ar-H); 7.78-7.67 (m, 7H, Ar-H); 7.52-7.41 (m, 3H, Ar-H); 7.30 (s broad, 2H,  $\text{NH}_2$ ); 7.13-7.09 (m, 1H, Ar-H); 4.03 (broad, 2H,  $\text{CH}_2$ ); 3.55 (broad, 4H,  $2\text{CH}_2$ ); 3.45 (t, 2H;  $J=5.6$  Hz,  $\text{OCH}_2$ ); 3.23 (s, 3H,  $\text{CH}_3$ ); 2.62-2.53 (broad+q, 6H,  $3\text{CH}_2$ ). **SC88381**:  $[\text{M}+\text{H}]^+$  calcd. for  $\text{C}_{29}\text{H}_{38}\text{N}_8\text{O}_5\text{S}_2$ , 643.248; found for  $[\text{M}+\text{H}]^+$ : 643.2. **SC88464**:

[M+H]<sup>+</sup> calcd. for C<sub>29</sub>H<sub>37</sub>N<sub>7</sub>O<sub>6</sub>S<sub>2</sub>, 644.233; found for [M+H]<sup>+</sup>: 644.2. **SC82686**: [M+H]<sup>+</sup> calcd. for C<sub>28</sub>H<sub>33</sub>N<sub>7</sub>O<sub>7</sub>S<sub>2</sub>, 644.196; found for [M+H]<sup>+</sup>: 644.1. <sup>1</sup>H NMR (DMSO-*d*<sub>6</sub>): 9.61-9.21 (very broad, 4H, 4NH); 8.08 (t, 1H, NH); 7.89-7.87 (m, 1H, Ar-H); 7.77-7.52 (m, 8H, Ar-H); 7.45-7.41 (m, 2H, Ar-H); 7.28 ((broad, 2H, NH<sub>2</sub>); 7.24-7.20 (m, 1H, Ar-H); 4.12-4.02 (m, 4H, CH<sub>2</sub>+OCH<sub>2</sub>); 3.82-3.40 (broad, 8H, 4CH<sub>2</sub>); 1.20 (t, 3H, J=7.1 Hz, CH<sub>3</sub>). <sup>13</sup>C NMR (75 MHz, DMSO-*d*<sub>6</sub>): 14.38, 42.12, 45.45 (2x), 47.09 (2x), 60.97, 117.06, 117.45 (2x), 120.75, 121.09, 125.42 (2x), 127.55 (2x), 127.69 (2x), 129.48, 230.09, 132.32, 140.86, 141.90, 142.78, 152.77, 154.39, 164.63, 166.92. **SC82693**: [M+H]<sup>+</sup> calcd. for C<sub>30</sub>H<sub>37</sub>N<sub>7</sub>O<sub>7</sub>S<sub>2</sub>, 672.227; found for [M+H]<sup>+</sup>: 672.2. <sup>1</sup>H NMR (DMSO-*d*<sub>6</sub>): 9.58 (s broad, 1H, NH); 9.52 (s broad, 1H, NH); 9.45 (broad, 1H, NH); 9.22 (s broad, 1H, NH); 8.08 (t, 1H, J=6.4 Hz, NH); 7.89 (m, 1H, Ar-H); 7.76-7.41 (m, 10H, Ar-H); 7.28 (s broad, 2H, NH<sub>2</sub>); 7.23-7.20 (m, 1H, Ar-H); 4.03 (d, 2H, J=6.3 Hz, CH<sub>2</sub>); 3.74 (m broad, 2H, CH<sub>2</sub>); 3.63 (m broad, 2H, CH<sub>2</sub>); water signal partially covers a group of signals; 1.42 (s, 9H, 3CH<sub>3</sub>). **SC82694**: [M+H]<sup>+</sup> calcd. for C<sub>31</sub>H<sub>39</sub>N<sub>7</sub>O<sub>7</sub>S<sub>2</sub>, 686.243; found for [M+H]<sup>+</sup>: 686.2. **SC83287**: [M+H]<sup>+</sup> calcd. for C<sub>27</sub>H<sub>31</sub>N<sub>7</sub>O<sub>6</sub>S<sub>2</sub>, 614.185; found for [M+H]<sup>+</sup>: 614.1. **SC83288**: [M+H]<sup>+</sup> calcd. for C<sub>27</sub>H<sub>31</sub>N<sub>7</sub>O<sub>7</sub>S<sub>2</sub>, 630.180 ; found for [M+H]<sup>+</sup>: 630.1. <sup>1</sup>H NMR (300 MHz, DMSO-*d*<sub>6</sub>): 9.96 (s, 1 H), 9.90 (s, 1 H), 9.39 (bs, 1 H), 8.08 (t, J = 6.3 Hz, 1 H), 7.86-7.89 (m, 1 H), 7.63-7.78 (m, 7 H), 7.54 (t, J = 7.9 Hz, 1 H), 7.44 (d, J = 8.3 Hz, 2 H), 7.29 (bs, 2 H), 7.21 (d, J = 7.5 Hz, 1 H), 4.03 (d, J = 6.1 Hz, 2 H), 3.64 (s, 3 H), 3.55-3.62 (m, 6 H), 3.28-3.32 (m, 2 H). <sup>13</sup>C NMR (75 MHz, DMSO-*d*<sub>6</sub>): 42.23 (2x), 45.55 (3x), 52.58, 117.43, 117.74 (2x), 121.46, 121.60, 125.56 (2x), 127.80 (4x), 129.63, 129.81, 132.97, 140.37, 142.01, 142.91, 143.47, 152.41, 154.92, 164.39. element. anal.: element: (calc. comp. incl. add. (%) / found (%)): C: (48.68 / 48.25), Cl: (5.32 / 4.77), H: (4.84 / 5.6), N: (14.72 / 14.51), O: (16.81 / 18.1), S: (9.63 / 7.99). **SC83289**: [M+H]<sup>+</sup> calcd. for C<sub>28</sub>H<sub>33</sub>N<sub>7</sub>O<sub>6</sub>S<sub>2</sub>, 628.201; found for [M+H]<sup>+</sup>: 628.0. <sup>1</sup>H NMR (DMSO-*d*<sub>6</sub>): 10.52 (very broad, 2H, 2NH); 9.38 (broad, 1H, NH); 8.05 (t broad, 1H, NH); 7.85 (broad, 1H, Ar-H); 7.76-7.66 (m, 7H, Ar-H); 7.54-7.41 (m, 3H, Ar-H); 7.29 (broad, 2H, NH<sub>2</sub>); 7.19-7.14 (m, 1H, Ar-H); 4.03 (d broad, 2H, CH<sub>2</sub>); 3.67-3.50 (broad, 8H, 4H<sub>2</sub>); 2.35 (q, 2H, J=7.4 Hz, CH<sub>2</sub>); 1.00 (t, 3H, J=7.4 Hz, CH<sub>3</sub>). **SC83290**: [M+H]<sup>+</sup> calcd. for C<sub>30</sub>H<sub>37</sub>N<sub>7</sub>O<sub>6</sub>S<sub>2</sub>, 656.232; found for [M+H]<sup>+</sup>: 656.0. <sup>1</sup>H NMR (DMSO-*d*<sub>6</sub>): 10.05-9.32 (very broad, 4H, 4NH); 8.07 (t, 1H, J=6.3 Hz, NH); 7.85 (broad, 1H, Ar-H); 7.76-7.62 (m, 7H, Ar-H); 7.57-7.51 (m, 1H, Ar-H); 7.46-7.40 (m, 2H, Ar-H); 7.29 (broad, 2H, NH<sub>2</sub>); 7.23-7.19 (m, 1H, Ar-H); 4.03 (d, 2H, J=5.9 Hz, CH<sub>2</sub>); 3.69-3.52 (broad, 8H, 4H<sub>2</sub>); 2.33 (t, 2H, J=7.4 Hz, CH<sub>2</sub>); 1.49 (m, 2H, 7.4 Hz, CH<sub>2</sub>); 1.30 (m, 2H, 7.4 Hz, CH<sub>2</sub>); 0.88 (t, 3H, J=7.4 Hz, CH<sub>3</sub>). **SC83311**: [M+H]<sup>+</sup> calcd. for C<sub>29</sub>H<sub>35</sub>N<sub>7</sub>O<sub>7</sub>S<sub>2</sub>, 658.211; found for [M+H]<sup>+</sup>: 658.1. <sup>1</sup>H NMR (DMSO-*d*<sub>6</sub>): 11.06-10.71 (s broad, 2H, 2NH); 8.03 (t, 1H, J=6.1Hz, NH); 7.85-7.81 (m broad, 1H, Ar-H); 7.77-7.66 (m, 7H, Ar-H); 7.51-7.41 (m, 3H, Ar-H); 7.29 (broad, 2H, NH<sub>2</sub>); 7.14-7.10 (m, 1H, Ar-H); 4.03 (d, 2H, J=6.0 Hz, CH<sub>2</sub>); 3.98 (t, 2H, J=6.6 Hz, OCH<sub>2</sub>); water signal covers a group of signals; 1.59 (m, 2H, CH<sub>2</sub>); 0.89 (t, 3H, J=7.4 Hz, CH<sub>3</sub>). **SC87410**: [M+H]<sup>+</sup> calcd. for C<sub>34</sub>H<sub>46</sub>N<sub>8</sub>O<sub>7</sub>S<sub>2</sub>, 743.301; found for [M+H]<sup>+</sup>: 743.3. <sup>1</sup>H NMR



(DMSO- $d_6$ ): 11.32-11.23 (m, 2H), 8.47 (s, 1H), 8.03 (t,  $J = 5.7$  Hz, 1H), 7.85-7.80 (m, 1H), 7.79-7.66 (m, 7H), 7.52-7.39 (m, 3H), 7.30 (s, 2H), 7.09 (d,  $J = 7.6$  Hz, 1H), 6.76 (s, 1H), 4.02 (d,  $J = 5.5$  Hz, 2H), under water and DMSO peak (12H), 1.61-1.20 (m, 13H). **SC82683**:  $[M+H]^+$  calcd. for  $C_{27}H_{33}N_7O_5S_2$ , 600.206; found for  $[M+H]^+$ : 600.2. **SC82684**:  $[M+H]^+$  calcd. for  $C_{30}H_{37}N_7O_5S_2$ , 640.237; found for  $[M+H]^+$ : 640.2. **SC82689**:  $[M+H]^+$  calcd. for  $C_{27}H_{33}N_7O_5S_2$ , 600.206; found for  $[M+H]^+$ : 600.2.  $^1H$  NMR (DMSO- $d_6$ ): 9.80-9.55 (broad, 3H, 3NH), 9.04 (broad, 1H, NH); 8.08 (t, 1H,  $J=6.4$  Hz, NH); 7.94 (m, 1H, Ar-H); 7.76-7.51 (m, 8H, Ar-H); 7.45-7.41 (m, 2H, Ar-H); 7.28 (broad, 2H,  $NH_2$ ); 7.25-7.21 (m, 1H, Ar-H); 4.03 (d, 2H,  $J=6.2$  Hz,  $CH_2$ ); 3.84-3.54 (broad, 4H,  $2CH_2$ ); water signal partially covers a group signals; 2.84-2.70 (broad, 6H,  $2CH_3$ ); 2.37-2.01 (broad, 2H,  $CH_2$ ). **SC82832**:  $[M+H]^+$  calcd. for  $C_{25}H_{28}N_6O_5S_2$ , 557.164; found for  $[M+H]^+$ : 557.1.  $^1H$  NMR (DMSO- $d_6$ ): 9.51 (s broad, 1H, NH); 9.42 (s broad, 1H, NH); 9.26 (broad, 1H, NH); 8.75 (s broad, 1H, NH); 8.08 (t, 1H,  $J=6.4$  Hz, NH); 7.90 (m, 1H, Ar-H); 7.76-7.41 (m, 10H, Ar-H); 7.28 (s broad, 2H,  $NH_2$ ); 7.25-7.21 (m, 1H, Ar-H); 4.04 (d, 2H,  $J=6.3$  Hz,  $CH_2$ ); 3.56 (t, 2H,  $J=6.9$  Hz;  $CH_2$ ); 3.41 (t, 2H,  $J=6.7$  Hz;  $CH_2$ ); 2.11-1.84 (m, 4H,  $2CH_2$ ). **SC82869**:  $[M+H]^+$  calcd. for  $C_{28}H_{37}N_7O_5S_2$ , 616.237; found for  $[M+H]^+$ : 616.2.  $^1H$  NMR (DMSO- $d_6$ ): 9.87-9.17 (very broad, 4H, 4NH), 8.09 (t, 1H,  $J=6.3$  Hz, NH); 7.96 (m, 1H, Ar-H); 7.77-7.55 (m, 8H, Ar-H); 7.45-7.41 (m, 2H, Ar-H); 7.28 (broad, 2H,  $NH_2$ ); 7.25-7.21 (m, 1H, Ar-H); 4.04 (d, 2H,  $J=6.3$  Hz,  $CH_2$ ); water signal partially covers a group signals; 1.07 (m broad, 6H,  $2CH_3$ ). **SC82870**:  $[M+H]^+$  calcd. for  $C_{27}H_{35}N_7O_5S_2$ , 602.222; found for  $[M+H]^+$ : 602.2. **SC82871**:  $[M+H]^+$  calcd. for  $C_{26}H_{33}N_7O_5S_2$ , 588.206; found for  $[M+H]^+$ : 588.2.  $^1H$  NMR (DMSO- $d_6$ ): 9.90-9.59 (m, 2H), 9.15 (bs, 1H), 8.09 (t,  $J = 6.4$  Hz, 1H), 7.93 (bs, 1H), 7.78-7.72 (m, 4H), 7.68 (d,  $J = 8.9$  Hz, 2H), 7.64-7.53 (m, 2H), 7.43 (d,  $J = 8.3$  Hz, 2H), 7.30-7.27 (m, 2H), 7.21 (d,  $J = 7.1$  Hz, 1H), 4.04 (d,  $J = 6.3$  Hz, 2H), 3.68-3.55 (m, 2H), 3.22 (s, 3H), 2.69-2.54 (m, 2H), under DMSO peak (6H). **SC82872**:  $[M+H]^+$  calcd. for  $C_{33}H_{48}N_8O_5S_2$ , 701.326; found for  $[M+H]^+$ : 701.3. **SC82905**:  $[M+H]^+$  calcd. for  $C_{26}H_{31}N_7O_5S_2$ , 586.190; found for  $[M+H]^+$ : 586.2.  $^1H$  NMR (DMSO- $d_6$ ): 9.61-9.46 (m, 2H), 9.19-9.07 (m, 1H), 8.02 (t,  $J = 6.4$  Hz, 1H), 7.91-7.84 (m, 1H), 7.73-7.64 (m, 4H), 7.59 (d,  $J = 8.3$  Hz, 2H), 7.49 (d,  $J = 4.8$  Hz, 2H), 7.36 (d,  $J = 8.3$  Hz, 2H), 7.22 (bs, 2H), 7.18-7.12 (m, 1H), 3.97 (d,  $J = 6.1$  Hz, 2H), 3.92-3.81 (m, 2H), 3.71-3.56 (m, 4H), 3.47-3.35 (m, 2H), 2.00-1.80 (m, 3H). **SC77225**:  $[M+H]^+$  calcd. for  $C_{26}H_{30}N_6O_6S_2$ , 587.174; found for  $[M+H]^+$ : 587.1.  $^1H$  NMR (DMSO- $d_6$ ): 9.67 (s, 1H, NH); 9.61 (s, 1H, NH); 8.08 (t, 1H,  $J=6.3$  Hz, NH); 7.86 (m, 1H, Ar-H); 7.76-7.51 (m, 8H, Ar-H); 7.45-7.42 (m, 2H, Ar-H); 7.28 (broad, 2H,  $NH_2$ ); 7.21-7.18 (m, 1H, Ar-H); 4.95 (d broad, 1H,  $J=3.4$  Hz, OH); 4.03 (d, 2H,  $J=6.2$  Hz,  $CH_2$ ); 3.90-3.83 (m broad, 1H, CH); water signal partially covers a group signals; 1.94-1.48 (broad, 4H,  $2CH_2$ ). **SC81450**:  $[M+H]^+$  calcd. for  $C_{26}H_{28}N_6O_6S_2$ , 585.159; found for  $[M+H]^+$ : 585.2.  $^1H$  NMR (DMSO- $d_6$ ): 9.69 (broad, 1H, NH); 9.62 (broad, 1H, NH); 8.08 (t, 1H,  $J=6.3$  Hz, NH); 7.92 (m, 1H, Ar-H); 7.77-7.52 (m, 8H, Ar-H); 7.46-7.41 (m, 2H, Ar-H); 7.30-7.23 (m, 3H, Ar-H+ $NH_2$ ); 4.03 (d, 2H,  $J=6.3$  Hz,  $CH_2$ ); 3.82 (broad, 4H,  $2CH_2$ ); 2.64 (broad, 4H,  $2CH_2$ ). **SC81452**:

[M+H]<sup>+</sup> calcd. for C<sub>27</sub>H<sub>33</sub>N<sub>7</sub>O<sub>6</sub>S<sub>2</sub>, 616.201; found for [M+H]<sup>+</sup>: 616.1. <sup>1</sup>H NMR (DMSO-*d*<sub>6</sub>): 10.12 (broad, 1H, NH); 10.05 (broad, 1H, NH); 8.09 (t, 1H, J=6.2 Hz, NH); 7.79-7.62 (m, 8H, Ar-H); 7.53 (m, 1H, Ar-H); 7.47-7.41 (m, 2H, Ar-H); 7.29 (s broad, 2H, NH<sub>2</sub>); 7.19-7.15 (m, 1H, Ar-H); 4.47 (t, 1H, J=5.3 Hz, OH); 4.03 (d, 2H, J=6.0 Hz, CH<sub>2</sub>); 3.51 (m, 2H, OCH<sub>2</sub>); water signal partially covers a group signals; 2.59 (broad, 4H, 2CH<sub>2</sub>). **SC81453**: [M+H]<sup>+</sup> calcd. for C<sub>26</sub>H<sub>31</sub>N<sub>7</sub>O<sub>6</sub>S<sub>2</sub>, 602.185; found for [M+H]<sup>+</sup>: 601.1. <sup>1</sup>H NMR (DMSO-*d*<sub>6</sub>): 9.61 (broad, 1H, NH); 9.54 (broad, 1H, NH); 8.08 (t, 1H, J=6.2 Hz, NH); 7.83 (m, 1H, Ar-H); 7.79-7.41 (m, 11H, Ar-H); 7.28 (s broad, 2H, NH<sub>2</sub>); 7.20-7.16 (m, 1H, Ar-H); 4.57 (t, 1H, J=5.1 Hz, OH); 4.03 (d, 2H, J=6.1 Hz, CH<sub>2</sub>); water signal partially covers a group signals; 1.89-1.70 (broad, 3H, CH+CH<sub>2</sub>); 1.40-1.20 (broad, 2H, CH<sub>2</sub>). **SC81454**: [M+H]<sup>+</sup> calcd. for C<sub>25</sub>H<sub>30</sub>N<sub>6</sub>O<sub>6</sub>S<sub>2</sub>, 575.174; found for [M+H]<sup>+</sup>: 575.1. **SC81455**: [M+H]<sup>+</sup> calcd. for C<sub>25</sub>H<sub>28</sub>N<sub>6</sub>O<sub>5</sub>S<sub>3</sub>, 589.136; found for [M+H]<sup>+</sup>: 589.0. <sup>1</sup>H NMR (DMSO-*d*<sub>6</sub>): 9.74 (broad, 1H, NH); 9.67 (broad, 1H, NH); 8.08 (t, 1H, J=6.3 Hz, NH); 7.87 (m, 1H, Ar-H); 7.77-7.51 (m, 8H, Ar-H); 7.46-7.41 (m, 2H, Ar-H); 7.28 (s broad, 2H, NH<sub>2</sub>); 7.24-7.20 (m, 1H, Ar-H); 4.03 (d, 2H, J=6.2 Hz, CH<sub>2</sub>); water signal partially covers a group signals; 2.85-2.80 (m, 4H, 2CH<sub>2</sub>). **SC81456**: [M+H]<sup>+</sup> calcd. for C<sub>27</sub>H<sub>34</sub>N<sub>6</sub>O<sub>7</sub>S<sub>2</sub>, 619.201; found for [M+H]<sup>+</sup>: 619.1. <sup>1</sup>H NMR (DMSO-*d*<sub>6</sub>): 9.62 (broad, 1H, NH); 9.56 (broad, 1H, NH); 8.07 (t, 1H, J=6.3 Hz, NH); 7.79-7.41 (m, 13H, Ar-H); 7.28 (s broad, 2H, NH<sub>2</sub>); 7.14-7.11 (m, 1H, Ar-H); 4.03 (d, 2H, J=6.2 Hz, CH<sub>2</sub>); 3.82-3.48 (broad, 8H, 4CH<sub>2</sub>); water signal partially covers a group signals. **SC81457**: [M+H]<sup>+</sup> calcd. for C<sub>27</sub>H<sub>31</sub>N<sub>7</sub>O<sub>6</sub>S<sub>2</sub>, 614.185; found for [M+H]<sup>+</sup>: 614.1. <sup>1</sup>H NMR (DMSO-*d*<sub>6</sub>): 9.63 (broad, 1H, NH); 9.56 (broad, 1H, NH); 8.08 (broad, 1H, NH); 7.84 (m, 1H, Ar-H); 7.77-7.42 (m, 10H, Ar-H); 7.32 (broad, 1H, NH<sub>2</sub>); 7.28 (broad, 2H, NH<sub>2</sub>); 7.21-7.18 (m, 1H, Ar-H); 6.87 (broad, 1H, NH<sub>2</sub>); 4.04-4.02 (broad, 2H, CH<sub>2</sub>); water signal partially covers a group signals; 1.92-1.62 (broad, 4H). **SC82687**: [M+H]<sup>+</sup> calcd. for C<sub>31</sub>H<sub>34</sub>N<sub>8</sub>O<sub>5</sub>S<sub>2</sub>, 663.217; found for [M+H]<sup>+</sup>: 663.2. <sup>1</sup>H NMR (DMSO-*d*<sub>6</sub>): 9.63-9.52 (broad, 3H, 3NH), 9.25 (broad, 1H, NH); 8.67-8.65 (m, 2H, Pyr-H); 8.09 (t, 1H, J=6.1 Hz, NH); 7.88 (m, 1H, Ar-H); 7.77-7.52 (m, 10H, Ar-H+Pyr-H); 7.46-7.41 (m, 2H, Ar-H); 7.30 (broad, 2H, NH<sub>2</sub>); 7.22-7.18 (m, 1H, Ar-H); 4.04 (d, 2H, J=6.2 Hz, CH<sub>2</sub>); water signal partially covers a group signals; 2.80-2.57 (m, 4H, 2CH<sub>2</sub>). **SC82692**: [M+H]<sup>+</sup> calcd. for C<sub>33</sub>H<sub>48</sub>N<sub>8</sub>O<sub>5</sub>S<sub>2</sub>, 701.326; found for [M+H]<sup>+</sup>: 662.2. **SC85039**: [M+H]<sup>+</sup> calcd. for C<sub>25</sub>H<sub>28</sub>N<sub>6</sub>O<sub>7</sub>S<sub>3</sub>, 621.126; found for [M+H]<sup>+</sup>: 621.1. <sup>1</sup>H NMR (DMSO-*d*<sub>6</sub>): 9.88 (s, 1H), 9.60-9.27 (m, 2H), 8.08 (t, J = 6.3 Hz, 1H), 7.98 (bs, 1H), 7.81-7.70 (m, 4H), 7.67 (d, J = 8.6 Hz, 2H), 7.63-7.52 (m, 2H), 7.43 (d, J = 8.2 Hz, 2H), 7.34-7.25 (m, 3H), 4.04 (d, J = 6.3 Hz, 2H), 3.83-3.56 (m, 4H), 3.21-2.97 (m, 4H). **SC88408**: [M+H]<sup>+</sup> calcd. for C<sub>20</sub>H<sub>20</sub>N<sub>6</sub>O<sub>6</sub>S<sub>2</sub>, 505.096; found for [M+H]<sup>+</sup>: 506.1. <sup>1</sup>H NMR (DMSO-*d*<sub>6</sub>): 9.74-9.48 (m, 1H), 9.29-9.08 (m, 1H), 9.03-8.88 (m, 1H), 8.00-7.56 (m, 8H), 7.55-7.41 (m, 1H), 7.37-7.15 (m, 6H), 5.72 (bs, 2H). **SC89127**: [M+H]<sup>+</sup> calcd. for C<sub>27</sub>H<sub>31</sub>N<sub>7</sub>O<sub>8</sub>S<sub>2</sub>, 646.175; found for [M+H]<sup>+</sup>: 646.2. **SC90436**: [M+H]<sup>+</sup> calcd. for C<sub>29</sub>H<sub>33</sub>N<sub>7</sub>O<sub>8</sub>S<sub>2</sub>, 672.190; found for [M+H]<sup>+</sup>: 672.2. **SC90478**: [M+H]<sup>+</sup> calcd. for C<sub>34</sub>H<sub>43</sub>N<sub>7</sub>O<sub>8</sub>S<sub>2</sub>, 742.269; found for [M+H]<sup>+</sup>: 756.3. <sup>1</sup>H NMR (DMSO-*d*<sub>6</sub>): 10.87 (s, 1H), 9.19 (s,

1H), 9.03 (s, 1H), 8.07 (t,  $J = 6.3$  Hz, 1H), 7.96 (t,  $J = 1.8$  Hz, 1H), 7.78-7.62 (m, 8H), 7.56-7.49 (m, 1H), 7.47-7.39 (m, 4H), 7.28 (s, 2H), 4.07-3.97 (m, 2H), under water peak (8H), 2.75-2.62 (m, 2H), 1.65-1.47 (m, 2H), 1.39-1.20 (m, 8H), 0.92-0.80 (m, 3H). **SC83332**:  $[M+H]^+$  calcd. for  $C_{29}H_{36}N_6O_5S_2$ , 613.226; found for  $[M+H]^+$ : 613.2. **SC84185**:  $[M+H]^+$  calcd. for  $C_{30}H_{38}N_6O_5S_2$ , 627.242; found for  $[M+H]^+$ : 627.2. **SC85194**:  $[M+H]^+$  calcd. for  $C_{27}H_{38}N_6O_4S$ , 543.275; found for  $[M+H]^+$ : 543.3 **SC85219**:  $[M+H]^+$  calcd. for  $C_{29}H_{42}N_6O_4S$ , 571.306; found for  $[M+H]^+$ : 585.3. **SC86755**:  $[M+H]^+$  calcd. for  $C_{22}H_{31}N_5O_4S_2$ , 494.189; found for  $[M+H]^+$ : 494.2. **SC86756**:  $[M+H]^+$  calcd. for  $C_{22}H_{31}N_5O_4S_2$ , 494.189; found for  $[M+H]^+$ : 494.2. **SC08323**:  $[M+H]^+$  calcd. for  $C_{20}H_{17}N_5O_5S$ , 440.103; found for  $[M+H]^+$ : 440.1. **SC08324**:  $[M+H]^+$  calcd. for  $C_{20}H_{17}N_5O_5S$ , 440.103; found for  $[M+H]^+$ : 440.1. **SC47789**:  $[M+H]^+$  calcd. for  $C_{24}H_{23}N_5O_6S$ , 510.144; found for  $[M+H]^+$ : 510.1. **SC47790**:  $[M+H]^+$  calcd. for  $C_{24}H_{23}N_5O_5S$ , 494.149; found for  $[M+H]^+$ : 494.0.  $^1H$  NMR (DMSO- $d_6$ ): 10.09 (s, 1H, NH); 9.86 (s, 1H, NH); 9.25-8.65 (broad, 2H, NH<sub>2</sub>); 8.31 (m, 2H, Ar-H); 8.10 (m, 2H, Ar-H); 7.85 (m, 2H, Ar-H); 7.73 (m, 1H, Ar-H); 7.63 (m, 2H, Ar-H); 7.52 (m, 1H, Ar-H); 7.43 (m, 1H, Ar-H); 7.14 (m, 1H, Ar-H); 3.46-3.28 (broad, 4H, 2NCH<sub>2</sub>) water signal partly covers this group of signals; 1.96-1.80 (broad, 4H, 2CH<sub>2</sub>). **SC47791**:  $[M+H]^+$  calcd. for  $C_{25}H_{26}N_6O_5S$ , 523.176; found for  $[M+H]^+$ : 523.2  $^1H$  NMR (DMSO- $d_6$ ): 10.18 (broad, 1H, NH); 9.96 (broad, 1H, NH); 9.51 (broad, 1H, NH); 9.26 (broad, 1H, NH); 8.39 (m, 2H, Ar-H); 8.18 (m, 2H, Ar-H); 7.94 (m, 2H, Ar-H); 7.76 (m, 1H, Ar-H); 7.71 (m, 2H, Ar-H); 7.63 (m, 1H, Ar-H); 7.53 (m, 1H, Ar-H); 7.18 (m, 1H, Ar-H); 3.76-3.28 (broad, 4H, 2NCH<sub>2</sub>) water signal partly covers this group of signals; 2.55-2.38 (broad, 4H, 2NCH<sub>2</sub>) DMSO signal covers partly this group of signals; 2.23 (s, 3H, CH<sub>3</sub>). **SC47793**:  $[M+H]^+$  calcd. for  $C_{25}H_{25}N_5O_6S$ , 524.160; found for  $[M+H]^+$ : 524.1.  $^1H$  NMR (DMSO- $d_6$ ): 10.13 (s, 1H, NH); 9.91 (s, 1H, NH); 9.37-9.16 (broad, 2H, NH); 8.29 (AB, 4H,  $J=63.3$  Hz, 8.9 Hz, Ar-H); 7.82 (AB, 4H,  $J=67.0$  Hz, 8.9 Hz, Ar-H); 7.78 (s, 1H, Ar-H); 7.61 (m, 1H, Ar-H); 7.52 (t, 1H,  $J=7.9$  Hz, Ar-H); 7.19 (m, 1H, Ar-H); 4.95 (d, 1H,  $J=3.6$  Hz, OH); 3.87-3.83 (broad, 1H, CH); 3.60-3.10 (broad, 4H, 2NCH<sub>2</sub>) water signal partly covers this group of signals; 2.00-1.40 (broad, 4H, 2CH<sub>2</sub>). **SC47830**:  $[M+H]^+$  calcd. for  $C_{21}H_{17}N_3O_7S$ , 456.086; found for  $[M+H]^+$ : 456.1. **SC47946**:  $[M+H]^+$  calcd. for  $C_{21}H_{20}N_4O_5S$ , 441.123; found for  $[M+H]^+$ : 441.1. **SC48019**:  $[M+H]^+$  calcd. for  $C_{22}H_{19}N_5O_7S$ , 498.108; found for  $[M+H]^+$ : 498.1. **SC48020**:  $[M+H]^+$  calcd. for  $C_{23}H_{21}N_5O_7S$ , 512.123; found for  $[M+H]^+$ : 512.1. **SC48021**:  $[M+H]^+$  calcd. for  $C_{25}H_{25}N_5O_7S$ , 540.155; found for  $[M+H]^+$ : 540.1. **SC48022**:  $[M+H]^+$  calcd. for  $C_{25}H_{25}N_5O_7S$ , 540.155; found for  $[M+H]^+$ : 540.1.  $^1H$  NMR (DMSO- $d_6$ ): 9.25 (bs, 1H), 9.11-8.94 (m, 3H), 8.39 (d,  $J=8.9$ Hz, 2H), 8.18 (d,  $J=8.9$ Hz, 2H), 8.06-8.05 (m, 1H), 7.92 (d,  $J=8.9$ Hz, 2H), 7.72 (d,  $J=8.9$ Hz, 1H), 7.65 (dd,  $J=1.3$ Hz,  $J=8.1$ Hz, 1H), 7.57 (d,  $J=7.9$ Hz, 1H), 7.40 (t,  $J=7.9$ Hz, 1H), 4.02 (t,  $J=6.6$ Hz, 2H), 1.64-1.55 (m, 2H), 1.43-1.30 (m, 2H), 0.91 (t,  $J=7.3$ Hz, 3H). **SC80504**:  $[M+H]^+$  calcd. for  $C_{25}H_{24}N_4O_7S$ , 525.144; found for  $[M+H]^+$ : 525.1.  $^1H$  NMR (DMSO- $d_6$ ): 9.34 (bs, 1H), 9.00 (bs, 1H), 8.39 (d,  $J=9.0$ Hz, 2H), 8.18 (d,  $J=9.0$ Hz, 2H), 7.92 (d,  $J=8.9$ Hz, 2H), 7.70 (d,  $J=9.0$ Hz, 2H), 7.55 (t,  $J=1.6$ Hz, 1H), 7.45-

7.40 (m, 1H), 7.35 (t,  $J=7.8\text{Hz}$ , 1H), 6.98 (td,  $J=1.3\text{Hz}$ ,  $J=7.3\text{Hz}$ , 1H), 4.76 (d,  $J=4.1\text{Hz}$ , 1H), 4.08-3.04 (m, 4H) under water peak, 1.80-1.26 (m, 4H). **SC80548**:  $[\text{M}+\text{H}]^+$  calcd. for  $\text{C}_{25}\text{H}_{25}\text{N}_5\text{O}_6\text{S}$ , 524.160; found for  $[\text{M}+\text{H}]^+$ : 524.2.  $^1\text{H}$  NMR ( $\text{DMSO}-d_6$ ): 9.74 (bs, 1H), 9.61 (bs, 1H), 9.25 (bs, 1H), 8.98 (bs, 1H), 8.39 (d,  $J=8.9\text{Hz}$ , 2H), 8.18 (d,  $J=8.9\text{Hz}$ , 2H), 7.94 (d,  $J=8.9\text{Hz}$ , 2H), 7.75-7.67 (m, 4H), 7.53 (d,  $J=8.7\text{Hz}$ , 2H), 4.94 (d,  $J=3.6\text{Hz}$ , 1H), 3.94-3.73 (m, 2H), 3.64-3.47 (m, 2H), 2.01-1.39 (m, 4H). **SC80548**:  $[\text{M}+\text{H}]^+$  calcd. for  $\text{C}_{25}\text{H}_{25}\text{N}_5\text{O}_6\text{S}$ , 524.160; found for  $[\text{M}+\text{H}]^+$ : 524.2. **SC80613**:  $[\text{M}+\text{H}]^+$  calcd. for  $\text{C}_{20}\text{H}_{16}\text{N}_4\text{O}_6\text{S}$ , 441.087; found for  $[\text{M}+\text{H}]^+$ : 441.1.  $^1\text{H}$  NMR ( $\text{DMSO}-d_6$ ): 9.34 (bs, 1H), 9.07 (bs, 1H), 8.39 (d,  $J=9.0\text{Hz}$ , 2H), 8.18 (d,  $J=9.0\text{Hz}$ , 2H), 7.93 (d,  $J=9.0\text{Hz}$ , 2H), 7.82 (d,  $J=8.8\text{Hz}$ , 2H), 7.71 (d,  $J=9.0\text{Hz}$ , 2H), 7.51 (d,  $J=8.8\text{Hz}$ , 2H), 7.16 (bs, 1H). **SC48443**:  $[\text{M}+\text{H}]^+$  calcd. for  $\text{C}_{20}\text{H}_{17}\text{BrN}_4\text{O}_3\text{S}$ , 473.028; found for  $[\text{M}+\text{H}]^+$ : 473.0.  $^1\text{H}$  NMR ( $\text{DMSO}-d_6$ ): 10.04 (bm, 1H), 9.78 (bs, 1H), 9.22-8.61 (bm, 3H), 7.94-7.80 (m, 7H), 7.75-7.66 (m, 3H), 7.54 (t,  $J=8.0\text{Hz}$ , 1H), 7.37 (d,  $J=7.0\text{Hz}$ , 1H). **SC77215**:  $[\text{M}+\text{H}]^+$  calcd. for  $\text{C}_{25}\text{H}_{25}\text{BrN}_4\text{O}_4\text{S}$ , 557.085; found for  $[\text{M}+\text{H}]^+$ : 556.6  $^1\text{H}$  NMR ( $\text{DMSO}-d_6$ ): 9.59 (s, 1H, NH); 9.42 (s, 1H, NH); 9.30 (s, 1H, NH); 9.02 (s, 1H, NH); 7.82-7.43 (m, 11H, Ar-H); 7.13 (m, 1H, Ar-H); 4.88 (d, 1H,  $J=3.5\text{ Hz}$ , OH); 3.84-3.13 (m, 5H, CH+2CH<sub>2</sub>) water signal partly covers this group of signals; 1.92-1.34 (m, 4H, 2CH<sub>2</sub>). **SC80503**:  $[\text{M}+\text{H}]^+$  calcd. for  $\text{C}_{25}\text{H}_{25}\text{ClN}_4\text{O}_4\text{S}$ , 513.136; found for  $[\text{M}+\text{H}]^+$ : 513.0.  $^1\text{H}$  NMR ( $\text{DMSO}-d_6$ ): 10.44 (s, 1H, NH); 9.33 (broad, 1H, NH); 9.26 (s, 1H, NH); 9.05 (broad, 1H, NH); 7.91-7.80 (m, 5H, Ar-H); 7.70-7.64 (m, 4H, Ar-H); 7.56-7.47 (m, 2H, Ar-H); 7.18-7.16 (m, 1H, Ar-H); 4.91 (d, 1H,  $J=3.6\text{ Hz}$ , OH); 3.86-3.79 (broad, 1H, CH); water signal covers the group of 2NCH<sub>2</sub> signals; 1.84-1.52 (broad, 4H, 2CH<sub>2</sub>). **SC80549**:  $^1\text{H}$  NMR ( $\text{DMSO}-d_6$ ): 9.25 (bs, 1H), 8.93 (bs, 1H), 7.96-7.83 (m, 6H), 7.69-7.65 (m, 4H), 7.63-7.56 (m, 1H), 7.49 (d,  $J=7.9\text{Hz}$ , 1H), 7.35 (t,  $J=7.9\text{Hz}$ , 1H), 7.28 (bs, 1H). **SC80697**:  $[\text{M}+\text{H}]^+$  calcd. for  $\text{C}_{25}\text{H}_{25}\text{BrN}_4\text{O}_4\text{S}$ , 557.085; found for  $[\text{M}+\text{H}]^+$ : 557.1.  $^1\text{H}$  NMR ( $\text{DMSO}-d_6$ ): 10.69 (bs, 1H), 10.58 (bs, 1H), 9.06 (bm, 1H), 7.88-7.80 (m, 6H), 7.77-7.65 (m, 4H), 7.51 (d,  $J = 8.8\text{ Hz}$ , 2H), 4.93 (bs, 1H), 3.34-3.88(m, 4H) under water peak, 1.50-1.94 (m, 4H). **SC81468**:  $[\text{M}+\text{H}]^+$  calcd. for  $\text{C}_{26}\text{H}_{27}\text{BrN}_4\text{O}_4\text{S}$ , 571.101; found for  $[\text{M}+\text{H}]^+$ : 570.9.  $^1\text{H}$  NMR ( $\text{DMSO}-d_6$ ): 10.22 (broad, 1H, NH); 10.03 (broad, 1H, NH); 9.40 (broad, 2H, NH); 8.11-7.86 (m, 9H, Ar-H); 7.84-7.79 (m, 1H, Ar-H); 7.76-7.68 (m, 1H, Ar-H); 7.39-7.35 (m, 1H, Ar-H); 4.76 (t, 1H,  $J=5.0\text{ Hz}$ , OH); 4.07-4.02 (broad, 2H, CH<sub>2</sub>); water signal partially covers the group of 2NCH<sub>2</sub> signals; 2.01-1.94 (broad, 3H, CH+CH<sub>2</sub>); 1.50-1.40 (broad, 2H, CH<sub>2</sub>). **SC81471**:  $[\text{M}+\text{H}]^+$  calcd. for  $\text{C}_{26}\text{H}_{29}\text{BrN}_4\text{O}_5\text{S}$ , 589.112; found for  $[\text{M}+\text{H}]^+$ : 589.1. **SC81472**:  $[\text{M}+\text{H}]^+$  calcd. for  $\text{C}_{24}\text{H}_{23}\text{BrN}_4\text{O}_3\text{S}_2$ , 559.047; found for  $[\text{M}+\text{H}]^+$ : 559.0. **SC81474**:  $[\text{M}+\text{H}]^+$  calcd. for  $\text{C}_{24}\text{H}_{23}\text{BrN}_4\text{O}_3\text{S}$ , 527.075; found for  $[\text{M}+\text{H}]^+$ : 527.0. **SC81476**:  $[\text{M}+\text{H}]^+$  calcd. for  $\text{C}_{26}\text{H}_{26}\text{BrN}_5\text{O}_4\text{S}$ , 584.096; found for  $[\text{M}+\text{H}]^+$ : 584.0.  $^1\text{H}$  NMR ( $\text{DMSO}-d_6$ ): 9.88 (bs, 1H), 9.65 (bs, 1H), 7.95-7.80 (m, 7H), 7.75-7.66 (m, 3H), 7.61-7.54 (m, 1H), 7.48 (t,  $J = 7.9\text{ Hz}$ , 1H), 7.30 (s, 1H), 7.13 (d,  $J = 7.6\text{ Hz}$ , 1H), 6.82 (bs, 1H), 3.90-3.78 (m, 1H), 3.20-2.90 (m, 4H), 1.85-1.46 (m, 4H). **SC81509**:  $[\text{M}+\text{H}]^+$  calcd. for  $\text{C}_{25}\text{H}_{27}\text{N}_5\text{O}_4\text{S}$ , 494.186; found for  $[\text{M}+\text{H}]^+$ : 494.1.  $^1\text{H}$  NMR ( $\text{DMSO}-d_6$ ): 11.30 (s, 1H, NH); 11.22 (s, 1H, NH); 7.81 (m, 1H,

Ar-H); 7.72-7.66 (m, 5H, Ar-H); 7.52-7.41 (m, 3H, Ar-H); 7.10-7.06 (m, 1H, Ar-H); 6.62-6.57 (m, 2H, Ar-H); 6.05 (s broad, 2H, NH<sub>2</sub>); 3.87-3.76 (m, 1H, CH); 3.75-3.67 (m, 2H, NCH<sub>2</sub>); water signal partially covers a group signals; 1.90-1.78 (broad, 2H, CH<sub>2</sub>); 1.58-1.44 (broad, 2H, CH<sub>2</sub>). **SC08666**: [M+H]<sup>+</sup> calcd. for C<sub>22</sub>H<sub>23</sub>N<sub>5</sub>O<sub>4</sub>S, 454.155; found for [M+H]<sup>+</sup>: 554.1. **SC48124**: [M+H]<sup>+</sup> calcd. for C<sub>20</sub>H<sub>19</sub>N<sub>5</sub>O<sub>3</sub>S, 410.128; found for [M+H]<sup>+</sup>: 410.1. **SC48125**: [M+H]<sup>+</sup> calcd. for C<sub>20</sub>H<sub>19</sub>N<sub>5</sub>O<sub>3</sub>S, 410.128; found for [M+H]<sup>+</sup>: 410.1. **SC48092**: [M+H]<sup>+</sup> calcd. for C<sub>21</sub>H<sub>21</sub>N<sub>5</sub>O<sub>5</sub>S<sub>2</sub>, 488.106; found for [M+H]<sup>+</sup>: 488.1. **SC48129**: [M+H]<sup>+</sup> calcd. for C<sub>25</sub>H<sub>24</sub>N<sub>6</sub>O<sub>6</sub>S<sub>2</sub>, 569.127; found for [M+H]<sup>+</sup>: 569.1. **SC81457**: [M+H]<sup>+</sup> calcd. for C<sub>27</sub>H<sub>31</sub>N<sub>7</sub>O<sub>6</sub>S<sub>2</sub>, 614.185; found for [M+H]<sup>+</sup>: 614.2. **SC84129**: [M+H]<sup>+</sup> calcd. for C<sub>30</sub>H<sub>37</sub>N<sub>7</sub>O<sub>4</sub>S, 592.270; found for [M+H]<sup>+</sup>: 592.3. **SC84199**: [M+H]<sup>+</sup> calcd. for C<sub>30</sub>H<sub>39</sub>N<sub>7</sub>O<sub>3</sub>S, 578.291; found for [M+H]<sup>+</sup>: 578.3. <sup>1</sup>H NMR (DMSO-*d*<sub>6</sub>): 10.77 (bs, 1H), 10.40 (bs, 1H), 8.48 (s, 1H), 7.82 (bs, 1H), 7.68 (d, *J* = 8.2 Hz, 2H), 7.50-7.38 (m, 5H), 7.13 (t, *J* = 5.8 Hz, 1H), 7.09-6.98 (m, 3H), 6.61 (d, *J* = 8.7 Hz, 2H), 5.88 (s, 1H), 3.74-3.16 (m, 8H), 2.89-2.75 (m, 2H), 2.62-2.54 (m, 2H), 2.38-2.29 (m, 2H), 1.48-1.21 (m, 4H), 0.88 (t, *J* = 7.2 Hz, 3H). **SC84302**: [M+H]<sup>+</sup> calcd. for C<sub>30</sub>H<sub>37</sub>N<sub>7</sub>O<sub>4</sub>S, 592.270; found for [M+H]<sup>+</sup>: 592.3. **SC84472**: [M+H]<sup>+</sup> calcd. for C<sub>30</sub>H<sub>39</sub>N<sub>7</sub>O<sub>3</sub>S, 578.291; found for [M+H]<sup>+</sup>: 578.3. <sup>1</sup>H NMR (DMSO-*d*<sub>6</sub>): 9.71-9.45 (m, 2H), 8.91 (s, 1H), 7.83-7.71 (m, 3H), 7.59 (d, *J* = 8.4 Hz, 1H), 7.52-7.42 (m, 3H), 7.26 (s, 2H), 7.17 (d, *J* = 8.8 Hz, 2H), 7.10 (d, *J* = 7.5 Hz, 1H), 6.56 (d, *J* = 8.8 Hz, 2H), 3.82 (bs, 1H), 3.48-3.16 (m, 6H), 3.10-3.02 (m, 2H), 2.95-2.86 (m, 2H), 2.75-2.58 (m, 4H), 1.53-1.19 (m, 4H), 0.88 (t, *J* = 7.3 Hz, 3H). **SC84509**: [M+H]<sup>+</sup> calcd. for C<sub>28</sub>H<sub>36</sub>N<sub>8</sub>O<sub>5</sub>S<sub>2</sub>, 629.233; found for [M+H]<sup>+</sup>: 629.1. <sup>1</sup>H NMR (DMSO-*d*<sub>6</sub>): 11.39-11.25 (m, 2H), 8.19 (s, 1H), 7.87-7.67 (m, 7H), 7.62-7.51 (m, 4H), 7.46 (t, *J* = 7.9 Hz, 1H), 7.31 (bs, 1H), 7.08 (d, *J* = 7.3 Hz, 1H), 6.97 (s, 1H), 6.86 (d, *J* = 8.9 Hz, 1H), under water and DMSO peak (10H), 1.48-1.20 (m, 4H), 0.88 (t, *J* = 7.22, 7.22 Hz, 3H). **SC84952**: [M+H]<sup>+</sup> calcd. for C<sub>28</sub>H<sub>35</sub>N<sub>7</sub>O<sub>3</sub>S, 550.260; found for [M+H]<sup>+</sup>: 550.3. **SC84969**: [M+H]<sup>+</sup> calcd. for C<sub>29</sub>H<sub>37</sub>N<sub>7</sub>O<sub>3</sub>S, 564.276; found for [M+H]<sup>+</sup>: 564.3. <sup>1</sup>H NMR (DMSO-*d*<sub>6</sub>): 9.98 (s, 1H), 9.38 (s, 1H), 8.44 (s, 1H), 7.80-7.73 (m, 3H), 7.58 (d, *J* = 8.2 Hz, 1H), 7.52 (d, *J* = 8.4 Hz, 2H), 7.41 (t, *J* = 7.9 Hz, 1H), 7.24 (bs, 2H), 7.15 (d, *J* = 8.9 Hz, 2H), 7.01 (d, *J* = 7.6 Hz, 1H), 6.49 (d, *J* = 8.9 Hz, 2H), 6.07 (t, *J* = 6.0 Hz, 1H), 4.32 (d, *J* = 5.2 Hz, 2H), under water and DMSO peak (10H), 1.47-1.21 (m, 4H), 0.88 (t, *J* = 7.23, 7.23 Hz, 3H). **SC85955**: [M+H]<sup>+</sup> calcd. for C<sub>26</sub>H<sub>29</sub>N<sub>7</sub>O<sub>7</sub>S<sub>2</sub>, 616.164; found for [M+H]<sup>+</sup>: 616.2. <sup>1</sup>H NMR (DMSO-*d*<sub>6</sub>): 11.04 (d, *J* = 16.5 Hz, 2H), 8.48 (s, 1H), 7.84-7.81 (m, 1H), 7.75-7.59 (m, 7H), 7.53-7.41 (m, 2H), 7.25-7.05 (m, 5H), under water peak (8H), 3.63 (s, 3H). **SC86099**: [M+H]<sup>+</sup> calcd. for C<sub>28</sub>H<sub>35</sub>N<sub>7</sub>O<sub>5</sub>S<sub>2</sub>, 614.222; found for [M+H]<sup>+</sup>: 613.2. <sup>1</sup>H NMR (DMSO-*d*<sub>6</sub>): 10.53 (bs, 1H), 10.20 (bs, 1H), 8.36 (s, 1H), 8.21 (t, *J* = 1.7 Hz, 1H), 8.05-7.99 (m, 1H), 7.90-7.84 (m, 1H), 7.82-7.78 (m, 1H), 7.74 (t, *J* = 7.81 Hz, 1H), 7.65 (d, *J* = 8.6 Hz, 1H), 7.60-7.51 (m, 2H), 7.46 (t, *J* = 7.9 Hz, 1H), 7.38 (d, *J* = 8.9 Hz, 2H), 7.07 (d, *J* = 7.6 Hz, 1H), 6.97 (d, *J* = 8.9 Hz, 2H), under water and DMSO peak (10H), 1.49-1.20 (m, 4H), 0.88 (t, *J* = 7.23, 7.23 Hz, 3H). **SC86100**: [M+H]<sup>+</sup> calcd. for C<sub>28</sub>H<sub>35</sub>N<sub>7</sub>O<sub>5</sub>S<sub>2</sub>, 613.222; found for [M+H]<sup>+</sup>: 613.2. <sup>1</sup>H NMR (DMSO-*d*<sub>6</sub>): 10.25 (bs,

1H), 9.95 (bs, 1H), 8.36 (s, 1H), 7.96 (d,  $J = 8.5$  Hz, 2H), 7.88 (d,  $J = 8.60$  Hz, 2H), 7.78 (s, 1H), 7.67-7.42 (m, 4H), 7.36 (d,  $J = 8.4$  Hz, 2H), 7.09 (d,  $J = 7.6$  Hz, 1H), 6.98 (d,  $J = 8.8$  Hz, 2H), under water and DMSO peak (10H), 1.48-1.22 (m, 4H), 0.88 (t,  $J = 7.22, 7.22$  Hz, 3H).

**SC86123:**  $[M+H]^+$  calcd. for  $C_{29}H_{37}N_7O_5S_2$ , 628.237; found for  $[M+H]^+$ : 628.2.  $^1H$  NMR (DMSO- $d_6$ ): 10.51 (bs, 1H), 10.17 (bs, 1H), 8.39 (s, 1H), 8.36-8.23 (m, 2H), 8.08-8.01 (m, 1H), 8.01-7.94 (m, 1H), 7.86-7.81 (m, 1H), 7.77 (t,  $J = 7.8$  Hz, 1H), 7.72-7.53 (m, 3H), 7.52-7.39 (m, 3H), 7.19-7.05 (m, 3H), 3.96 (s, 2H), under water and DMSO peak (10H), 1.50-1.19 (m, 4H), 0.88 (t,  $J = 7.23, 7.23$  Hz, 3H).

**SC86124:**  $[M+H]^+$  calcd. for  $C_{29}H_{37}N_7O_5S_2$ , 628.237; found for  $[M+H]^+$ : 628.2.  $^1H$  NMR (DMSO- $d_6$ ): 10.22 (bs, 1H), 9.94 (bs, 1H), 8.40-8.19 (m, 2H), 8.05-7.91 (m, 4H), 7.85-7.79 (m, 1H), 7.71-7.53 (m, 2H), 7.48 (t,  $J = 7.9$  Hz, 1H), 7.41 (d,  $J = 8.4$  Hz, 2H), 7.18-7.05 (m, 3H), 3.96 (s, 2H), under water and DMSO peak (10H), 1.54-1.17 (m, 4H), 0.88 (t,  $J = 7.23, 7.23$  Hz, 3H).

**SC88165:**  $[M+H]^+$  calcd. for  $C_{31}H_{37}N_7O_4S$ , 604.270; found for  $[M+H]^+$ : 604.3.  $^1H$  NMR (DMSO- $d_6$ ): 9.84 (s, 1H), 9.71 (s, 1H), 9.47-8.90 (bm, 3H), 7.99-7.92 (m, 2H), 7.75-7.71 (m, 3H), 7.65 (t,  $J=8.9$ Hz, 2H), 7.54 (t,  $J=7.9$ Hz, 1H), 7.38 (d,  $J=7.7$ Hz, 1H), 7.31-7.20 (m, 5H), 3.96 (s, 2H).

**SC88166:**  $[M+H]^+$  calcd. for  $C_{30}H_{37}N_7O_5S_2$ , 640.237; found for  $[M+H]^+$ : 640.2.

**SC48590:**  $[M+H]^+$  calcd. for  $C_{18}H_{21}N_5O_4S$ , 404.139; found for  $[M+H]^+$ : 404.01.  $^1H$  NMR (DMSO- $d_6$ ): 9.74-9.30 (m, 3H), 9.03-8.89 (m, 2H), 7.99 (bs, 1H), 7.77-7.71 (m, 3H), 7.67 (d,  $J=8.9$ Hz, 2H), 7.55 (t,  $J=8.0$ Hz, 1H), 7.39 (d,  $J=7.6$ Hz, 1H), 3.67-3.62 (m, 4H), 2.87-2.84 (m, 4H).

**SC50582:**  $[M+H]^+$  calcd. for  $C_{28}H_{32}N_6O_4S$ , 549.228; found for  $[M+H]^+$ : 549.2.

**SC50603:**  $[M+H]^+$  calcd. for  $C_{29}H_{32}FN_5O_4S$ , 566.223; found for  $[M+H]^+$ : 566.2.

**SC50604:**  $[M+H]^+$  calcd. for  $C_{29}H_{33}FN_6O_3S$ , 565.239; found for  $[M+H]^+$ : 565.2.

**SC50633:**  $[M+H]^+$  calcd. for  $C_{28}H_{31}N_5O_5S$ , 550.212; found for  $[M+H]^+$ : 550.2.

**SC77227:**  $[M+H]^+$  calcd. for  $C_{26}H_{26}F_3N_5O_4S$ , 562.173; found for  $[M+H]^+$ : 562.2.  $^1H$  NMR (DMSO- $d_6$ ): 9.64-9.10 (m, 3H), 8.10 (m, 1H), 7.87 (bs, 1H), 7.73-7.51 (m, 6H), 7.47-7.33 (m, 1H), 7.11-6.99 (m, 1H), 4.97 (m, 1H), 4.03 (d,  $J=5.5$ Hz, 2H), 3.29 (m, 4H) under water peak, 2.00-1.27 (m, 4H).

**SC80166:**  $[M+H]^+$  calcd. for  $C_{27}H_{28}F_3N_5O_4S$ , 576.189; found for  $[M+H]^+$ : 576.2.  $^1H$  NMR (DMSO- $d_6$ ): 9.86 (bs, 1H), 9.71 (bs, 1H), 9.40 (bs, 1H), 9.13 (bs, 1H), 7.82 (m, 1H), 7.76-7.70 (m, 4H), 7.64-7.61 (m, 1H), 7.58-7.45 (m, 2H), 7.21-7.12 (m, 2H), 4.96 (bs, 1H), 4.20 (bs, 2H), 3.90-3.77 (m, 2H), 3.63-3.45 (m, 2H), 3.30 (m, 3H) under water peak, 1.99-1.48 (m, 4H).

**SC80502:**  $[M+H]^+$  calcd. for  $C_{20}H_{17}ClN_4O_3S$ , 429.078; found for  $[M+H]^+$ : 429.1.

**SC85370:**  $[M+H]^+$  calcd. for  $C_{30}H_{38}N_6O_4S$ , 579.275; found for  $[M+H]^+$ : 579.3.

**SC85371:**  $[M+H]^+$  calcd. for  $C_{30}H_{37}N_7O_4S$ , 592.270; found for  $[M+H]^+$ : 592.3.

**SC86525:**  $[M+H]^+$  calcd. for  $C_{23}H_{32}N_6O_3S$ , 473.233; found for  $[M+H]^+$ : 473.2.

**SC87510:**  $[M+H]^+$  calcd. for  $C_{24}H_{26}N_6O_6S_2$ , 559.143; found for  $[M+H]^+$ : 559.1.  $^1H$  NMR (DMSO- $d_6$ ): 10.69-9.10 (broad, 3H, 3NH); 8.44 (broad, 1H, NH); 7.81 (m, 1H, Ar-H); 7.75-7.59 (m, 7H, Ar-H); 7.49 (m, 1H, Ar-H); 7.22-7.08 (m, 5H, Ar-H+NH<sub>2</sub>); 3.73 (broad, 4H, 2CH<sub>2</sub>); 3.54 (broad, 4H, 2CH<sub>2</sub>); water signal interferes with these two signals.

**SC87512:**  $[M+H]^+$  calcd. for  $C_{25}H_{29}N_7O_5S_2$ , 572.175; found for  $[M+H]^+$ : 572.1.  $^1H$  NMR (DMSO- $d_6$ ): 10.45 (broad, 1H, NH);

10.34 (broad, 1H, NH); 8.21 (s, 1H, NH); 7.77-7.60 (m, 8H, Ar-H); 7.51 (m, 1H, Ar-H); 7.27-7.21 (m, 2H, Ar-H); 7.19-7.12 (m, 3H, Ar-H+NH<sub>2</sub>); water signal partially covers a group signals; 2.23 (s, 3H, CH<sub>3</sub>). **SC87513**: [M+H]<sup>+</sup> calcd. for C<sub>26</sub>H<sub>32</sub>N<sub>8</sub>O<sub>5</sub>S<sub>2</sub>, 601.201; found for [M+H]<sup>+</sup>: 601.2. <sup>1</sup>H NMR (DMSO-*d*<sub>6</sub>): 11.69 (bs, 1H), 11.63 (bs, 1H), 8.42 (s, 2H), 8.03-7.97 (m, 1H), 7.82 (d, *J* = 8.2 Hz, 1H), 7.75-7.68 (m, 4H), 7.63 (d, *J* = 8.8 Hz, 2H), 7.48 (t, *J* = 8.0 Hz, 1H), 7.28-7.15 (m, 4H), 3.51 (t, *J* = 5.86, 5.86 Hz, 2H), under water and DMSO peak (11H). **SC81373**: [M+H]<sup>+</sup> calcd. for C<sub>20</sub>H<sub>17</sub>BrN<sub>4</sub>OS, 441.038; found for [M+H]<sup>+</sup>: 441. <sup>1</sup>H NMR (DMSO-*d*<sub>6</sub>): 9.40 (bs, 2H), 9.32 (bs, 2H), 8.94 (bs, 2H), 7.95 (t, *J* = 1.8 Hz, 1H), 7.70-7.73 (m, 1H), 7.61-7.47 (m, 5H), 7.42 (d, *J* = 8.7 Hz, 2H), 7.36 (d, *J* = 8.4 Hz, 1H), 7.10 (d, *J* = 8.7 Hz, 2H). **SC82748**: [M+H]<sup>+</sup> calcd. for C<sub>23</sub>H<sub>28</sub>F<sub>3</sub>N<sub>5</sub>O, 448.232; found for [M+H]<sup>+</sup>: 448.2. <sup>1</sup>H NMR (DMSO-*d*<sub>6</sub>): 9.85-9.21 (m, 4H), 8.08 (bs, 1H), 7.90 (bs, 1H), 7.67-7.48 (m, 4H), 7.33 (d, *J* = 7.6 Hz, 1H), 7.19 (d, *J* = 7.5 Hz, 1H), under DMSO and water peak (9H), 1.58-1.40 (m, 2H), 1.38-1.21 (m, 2H), 0.89 (t, *J* = 7.3 Hz, 3H). **SC88407**: [M+H]<sup>+</sup> calcd. for C<sub>21</sub>H<sub>21</sub>N<sub>5</sub>O<sub>4</sub>S, 440.139; found for [M+H]<sup>+</sup>: 440.1. **SC90612**: [M+H]<sup>+</sup> calcd. for C<sub>25</sub>H<sub>26</sub>N<sub>6</sub>O<sub>7</sub>S<sub>2</sub>, 587.138; found for [M+H]<sup>+</sup>: 587.1. <sup>1</sup>H NMR (DMSO-*d*<sub>6</sub>): 9.19 (s, 1H), 8.94 (s, 1H), 8.15-8.01 (m, 2H), 7.78-7.69 (m, 4H), 7.65 (d, *J* = 9.0 Hz, 2H), 7.59-7.47 (m, 2H), 7.44 (d, *J* = 8.5 Hz, 2H), 7.29 (bs, 2H), 4.04 (d, *J* = 6.6 Hz, 2H), 3.85-3.80 (m, 4H), 3.49-3.41 (m, 1H). **SC12215**: [M+H]<sup>+</sup> calcd. for C<sub>13</sub>H<sub>15</sub>N<sub>3</sub>O<sub>4</sub>S<sub>2</sub>, 342.058; found for [M+H]<sup>+</sup>: 342.1. <sup>1</sup>H NMR (DMSO-*d*<sub>6</sub>): 7.76-7.69 (m, 3H), 7.47-7.42 (m, 4H), 7.28 (bs, 2H), 6.23 (d, *J*=8.7Hz, 2H), 5.91 (bs, 2H), 3.96 (d, *J*=6.4Hz, 2H). **SC83244**: [M+H]<sup>+</sup> calcd. for C<sub>15</sub>H<sub>17</sub>N<sub>3</sub>O<sub>5</sub>S<sub>2</sub>, 384.068; found for [M+H]<sup>+</sup>: 384.1. <sup>1</sup>H NMR (DMSO-*d*<sub>6</sub>): 10.28 (s, 1H), 8.08 (t, *J* = 6.3 Hz, 1H), 7.80-7.70 (m, 6H), 7.42 (d, *J* = 8.3 Hz, 2H), 7.28 (bs, 2H), 4.02 (d, *J* = 6.3 Hz, 2H), 2.09 (s, 3H). **SC86438**: [M+H]<sup>+</sup> calcd. for C<sub>14</sub>H<sub>16</sub>N<sub>4</sub>O<sub>4</sub>S<sub>3</sub>, 401.041; found for [M+H]<sup>+</sup>: 401.0. <sup>1</sup>H NMR (DMSO-*d*<sub>6</sub>): 10.09 (s, 1H), 8.13 (t, *J* = 6.3 Hz, 1H), 7.81-7.70 (m, 7H), 7.45 (d, *J* = 8.4 Hz, 2H), 7.29 (bs, 2H), 4.04 (d, *J* = 6.3 Hz, 2H).

## Supplementary References

1. Fox, J. G. *et al. The Mouse in Biomedical Research: Normative Biology, Husbandry, and Models*. Elsevier Science (2006).
2. Abdullah, A. S. & Baggot, J. D. Pharmacokinetics of imidocarb in normal dogs and goats. *J Vet Pharmacol Ther* **6**, 195-199 (1983).
3. Omasits, U., Ahrens, C. H., Muller, S. & Wollscheid, B. Protter: interactive protein feature visualization and integration with experimental proteomic data. *Bioinformatics* **30**, 884-886 (2014).
